# Supplementary material for: Efficient C(sp3)–P(v) bond cleavage and reconstruction of free α-aminophosphonates via palladium catalysis
Source: Royal Society of Chemistry journal article supplement (doi:10.1039/d4cc03702b), 2024-01-01

## Supporting Information

### **Efficient C(sp<sup>3</sup>)-P(V) Bond Cleavage and Reconstruction of Free α-Aminophosphonates via Palladium Catalysis**

Li-Na Yi, Jinghan Bu, Tao Zhao, Mengyi Huang, and Qiang Yang\*

Key Laboratory of General Chemistry of the National Ethnic Affairs Commission,  
College of Chemistry and Environment, Southwest Minzu University, Chengdu  
610041, China

Email: yq09@swun.edu.cn

## Table of Contents

|                                                                                               |     |
|-----------------------------------------------------------------------------------------------|-----|
| 1. General information .....                                                                  | S1  |
| 2. General procedure for the preparation of primary diethyl $\alpha$ -aminophosphonates ..... | S1  |
| 3. Optimization of the reaction conditions.....                                               | S2  |
| 4. General procedure for Pd-catalyzed C-P bond arylation of $\alpha$ -aminophosphonates ..... | S3  |
| 5. Characterization data of products.....                                                     | S3  |
| 6. Preliminary mechanistic studies .....                                                      | S13 |
| 7. References.....                                                                            | S15 |
| 8. Copies of NMR spectra.....                                                                 | S16 |

## 1. General information

$^1\text{H}$  and  $^{13}\text{C}$  NMR spectra were recorded on Bruker advance III 600 MHz and Varian 400 MHz spectrometer in  $\text{CDCl}_3$  with TMS as internal standard. Chemical shifts ( $\delta$ ) were measured in ppm relative to TMS  $\delta = 0$  for  $^1\text{H}$ , or to chloroform  $\delta = 77.0$  for  $^{13}\text{C}$  as internal standard.  $^{31}\text{P}$  NMR spectra were recorded on a Bruker advance III 600 and 400 spectrometer. Data are reported as follows: Chemical shift, multiplicity (s = singlet, d = doublet, t = triplet, q = quartet, m = multiplet), Coupling constants are reported in Hertz (Hz). High resolution mass spectroscopic (HRMS) and mass spectra were measured using Bruker micro TOF-Q mass spectrometer and Thermo Scientific DS II mass spectrometer. Analytical thin layer chromatography (TLC) was carried out using commercial silica-gel plates, spots were detected with UV light (254 nm) and revealed with phosphomolybdic acid solutions. Melting points were determined by the BÜCHI Melting Point B-540. The aminophosphonates were synthesized by reported methods, and the halides were purchased from Sigma-Aldrich, J&K Chemicals, bidepharm and Adamas, and used without further purification. Solvents were dried and purified according to the procedure from "Purification of Laboratory Chemicals book". Column chromatography was carried out on silica gel (particle size 200-400 mesh ASTM).

## 2. General procedure for the preparation of free diethyl $\alpha$ -aminophosphonates

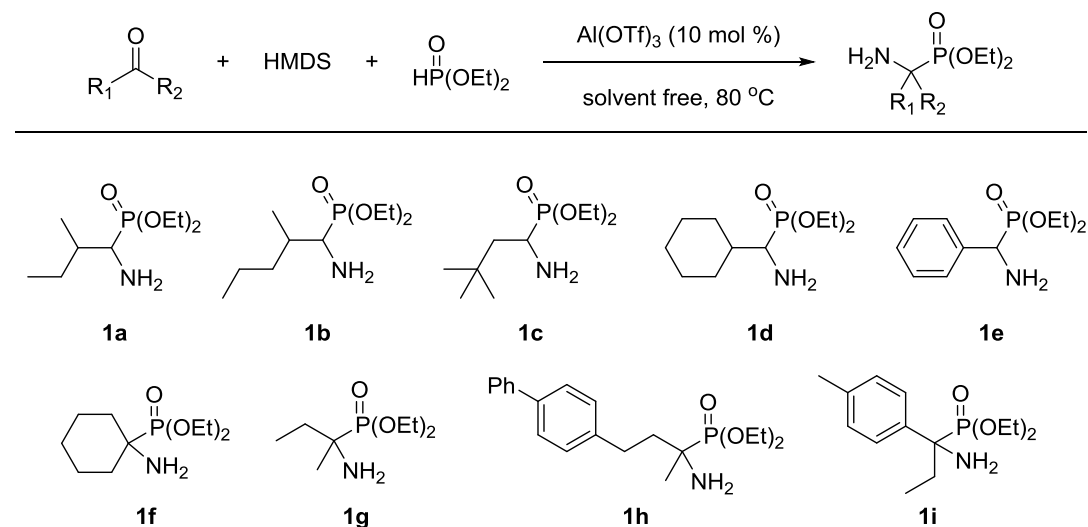

**General procedure<sup>1</sup>:** A mixture of an aldehyde/ketone (2.0 mmol, 1.7 equiv), HMDS (249.6  $\mu\text{L}$ , 1.2 mmol, 1.0 equiv), diethyl phosphite (154.4  $\mu\text{L}$ , 1.2 mmol, 1.0 equiv), and  $\text{Al(OTf)}_3$  (5.7 mg, 0.012 mmol, 1 mol %) was stirred in an oil bath at  $80^\circ\text{C}$  overnight. The reaction mixture was then cooled and acidified to  $\text{pH} = 1$  by  $\text{HCl}$  (aq). The solution was washed with  $\text{EtOAc}$  ( $2 \times 10$  mL). The aqueous phase was then made alkaline with  $\text{NaOH}$  (aq) and the product was extracted with  $\text{EtOAc}$  ( $2 \times 10$  mL). All the organic extracts were collected, combined in a vial and evaporated under reduced pressure and the resulting mixture was purified by silica gel chromatography ( $\text{PE/EA} = 1:3$ ) to afford the diethyl  $\alpha$ -aminophosphonates.

### 3. Optimization of the reaction conditions

**Table S1.** Optimization of conditions for Pd-catalyzed C-P bond arylation of  $\alpha$ -aminophosphonate **1a**<sup>a</sup>

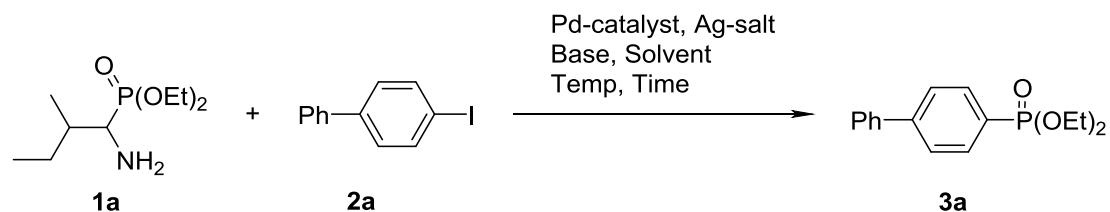

| Entry | Pd-catalyst (mol %)                                                    | Ag-salt (equiv)                       | Base (equiv)                          | Solvent            | T (°C) | Yield (%)       |
|-------|------------------------------------------------------------------------|---------------------------------------|---------------------------------------|--------------------|--------|-----------------|
| 1     | Pd(OAc) <sub>2</sub> (10)                                              | AgOTs (2)                             | KHCO <sub>3</sub> (2)                 | TFE                | 130    | 35              |
| 2     | Pd(OAc) <sub>2</sub> (10)                                              | AgOTs (2)                             | KHCO <sub>3</sub> (2)                 | HFIP               | 130    | 35              |
| 3     | Pd(OAc) <sub>2</sub> (10)                                              | AgOTs (2)                             | KHCO <sub>3</sub> (2)                 | 1,4-dioxane        | 130    | 48              |
| 4     | Pd(OAc) <sub>2</sub> (10)                                              | AgOTs (2)                             | KHCO <sub>3</sub> (2)                 | CH <sub>3</sub> CN | 130    | 21              |
| 5     | Pd(OAc) <sub>2</sub> (10)                                              | AgOTs (2)                             | KHCO <sub>3</sub> (2)                 | DCE                | 130    | 38              |
| 6     | Pd(OAc) <sub>2</sub> (10)                                              | AgOTs (2)                             | KHCO <sub>3</sub> (2)                 | Toluene            | 130    | 36              |
| 7     | Pd(OAc) <sub>2</sub> (10)                                              | AgOTs (2)                             | KHCO <sub>3</sub> (2)                 | DME                | 130    | 38              |
| 8     | Pd(OAc) <sub>2</sub> (10)                                              | AgOTs (2)                             | KHCO <sub>3</sub> (2)                 | DMF                | 130    | 35              |
| 9     | Pd(OAc) <sub>2</sub> (10)                                              | AgOAc (2)                             | KHCO <sub>3</sub> (2)                 | 1,4-dioxane        | 130    | 52              |
| 10    | Pd(OAc) <sub>2</sub> (10)                                              | Ag <sub>2</sub> CO <sub>3</sub> (2)   | KHCO <sub>3</sub> (2)                 | 1,4-dioxane        | 130    | 48              |
| 11    | Pd(OAc) <sub>2</sub> (10)                                              | Ag <sub>3</sub> PO <sub>4</sub> (2)   | KHCO <sub>3</sub> (2)                 | 1,4-dioxane        | 130    | 69              |
| 12    | Pd(OAc) <sub>2</sub> (10)                                              | AgNO <sub>3</sub> (2)                 | KHCO <sub>3</sub> (2)                 | 1,4-dioxane        | 130    | 38              |
| 13    | Pd(OAc) <sub>2</sub> (10)                                              | AgTFA (2)                             | KHCO <sub>3</sub> (2)                 | 1,4-dioxane        | 130    | 45              |
| 14    | PdCl <sub>2</sub> (10)                                                 | Ag <sub>3</sub> PO <sub>4</sub> (2)   | KHCO <sub>3</sub> (2)                 | 1,4-dioxane        | 130    | 59              |
| 15    | [PdCl(C <sub>3</sub> H <sub>5</sub> ) <sub>3</sub> ] <sub>2</sub> (10) | Ag <sub>3</sub> PO <sub>4</sub> (2)   | KHCO <sub>3</sub> (2)                 | 1,4-dioxane        | 130    | 52              |
| 16    | PdCl <sub>2</sub> [P(Cy) <sub>3</sub> ] <sub>2</sub> (10)              | Ag <sub>3</sub> PO <sub>4</sub> (2)   | KHCO <sub>3</sub> (2)                 | 1,4-dioxane        | 130    | 93              |
| 17    | Pd <sub>2</sub> (dba) <sub>3</sub> (10)                                | Ag <sub>3</sub> PO <sub>4</sub> (2)   | KHCO <sub>3</sub> (2)                 | 1,4-dioxane        | 130    | 48              |
| 18    | Pd(TFA) <sub>2</sub> (10)                                              | Ag <sub>3</sub> PO <sub>4</sub> (2)   | KHCO <sub>3</sub> (2)                 | 1,4-dioxane        | 130    | 49              |
| 19    | PdCl <sub>2</sub> [P(Cy) <sub>3</sub> ] <sub>2</sub> (10)              | Ag <sub>3</sub> PO <sub>4</sub> (2)   | NaHCO <sub>3</sub> (2)                | 1,4-dioxane        | 130    | 93              |
| 20    | PdCl <sub>2</sub> [P(Cy) <sub>3</sub> ] <sub>2</sub> (10)              | Ag <sub>3</sub> PO <sub>4</sub> (2)   | Na <sub>2</sub> CO <sub>3</sub> (2)   | 1,4-dioxane        | 130    | 97              |
| 21    | PdCl <sub>2</sub> [P(Cy) <sub>3</sub> ] <sub>2</sub> (10)              | Ag <sub>3</sub> PO <sub>4</sub> (2)   | KOAc (2)                              | 1,4-dioxane        | 130    | 52              |
| 22    | PdCl <sub>2</sub> [P(Cy) <sub>3</sub> ] <sub>2</sub> (10)              | Ag <sub>3</sub> PO <sub>4</sub> (2)   | K <sub>2</sub> HPO <sub>4</sub> (2)   | 1,4-dioxane        | 130    | 69              |
| 23    | PdCl <sub>2</sub> [P(Cy) <sub>3</sub> ] <sub>2</sub> (10)              | Ag <sub>3</sub> PO <sub>4</sub> (2)   | K <sub>2</sub> CO <sub>3</sub> (2)    | 1,4-dioxane        | 130    | 93              |
| 24    | PdCl <sub>2</sub> [P(Cy) <sub>3</sub> ] <sub>2</sub> (10)              | Ag <sub>3</sub> PO <sub>4</sub> (2)   | Na <sub>2</sub> CO <sub>3</sub> (2)   | 1,4-dioxane        | 110    | 83              |
| 25    | PdCl <sub>2</sub> [P(Cy) <sub>3</sub> ] <sub>2</sub> (10)              | Ag <sub>3</sub> PO <sub>4</sub> (2)   | Na <sub>2</sub> CO <sub>3</sub> (2)   | 1,4-dioxane        | 90     | 55              |
| 26    | PdCl <sub>2</sub> [P(Cy) <sub>3</sub> ] <sub>2</sub> (10)              | Ag <sub>3</sub> PO <sub>4</sub> (0.3) | Na <sub>2</sub> CO <sub>3</sub> (2)   | 1,4-dioxane        | 130    | 52              |
| 27    | PdCl <sub>2</sub> [P(Cy) <sub>3</sub> ] <sub>2</sub> (10)              | Ag <sub>3</sub> PO <sub>4</sub> (0.6) | Na <sub>2</sub> CO <sub>3</sub> (2)   | 1,4-dioxane        | 130    | 79              |
| 28    | PdCl <sub>2</sub> [P(Cy) <sub>3</sub> ] <sub>2</sub> (10)              | Ag <sub>3</sub> PO <sub>4</sub> (0.9) | Na <sub>2</sub> CO <sub>3</sub> (2)   | 1,4-dioxane        | 130    | 97              |
| 29    | PdCl <sub>2</sub> [P(Cy) <sub>3</sub> ] <sub>2</sub> (5)               | Ag <sub>3</sub> PO <sub>4</sub> (0.9) | Na <sub>2</sub> CO <sub>3</sub> (2)   | 1,4-dioxane        | 130    | 69              |
| 30    | PdCl <sub>2</sub> [P(Cy) <sub>3</sub> ] <sub>2</sub> (10)              | Ag <sub>3</sub> PO <sub>4</sub> (0.9) | Na <sub>2</sub> CO <sub>3</sub> (1)   | 1,4-dioxane        | 130    | 69              |
| 31    | PdCl <sub>2</sub> [P(Cy) <sub>3</sub> ] <sub>2</sub> (10)              | Ag <sub>3</sub> PO <sub>4</sub> (0.9) | Na <sub>2</sub> CO <sub>3</sub> (1.5) | 1,4-dioxane        | 130    | 86              |
| 32    | PdCl <sub>2</sub> [P(Cy) <sub>3</sub> ] <sub>2</sub> (10)              | Ag <sub>3</sub> PO <sub>4</sub> (0.9) | Na <sub>2</sub> CO <sub>3</sub> (2)   | 1,4-dioxane        | 130    | 76 <sup>b</sup> |

<sup>a</sup> **1a** (0.2 mmol), **2a** (0.4 mmol), Pd-catalyst, Ag-salt, Base, solvent (2 mL) at T °C under Ar; isolated yields; <sup>b</sup> In air.

## 4. General procedure for Pd-catalyzed C-P bond arylation of $\alpha$ -aminophosphonates

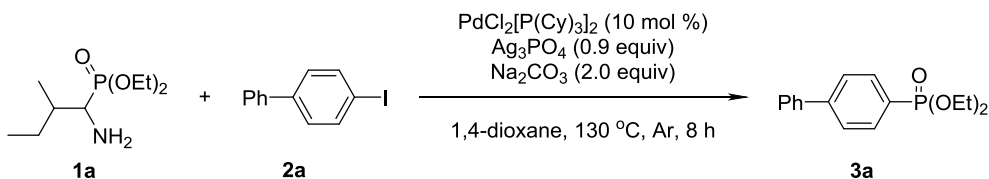

### General procedure (**3a** as example)

In a 10 mL Schlenk tube containing a magnetic stir bar, **1a** (44.6 mg, 0.2 mmol, 1.0 equiv), **2a** (112.0 mg, 0.4 mmol, 2.0 equiv),  $\text{PdCl}_2[\text{P}(\text{Cy})_3]_2$  (14.8 mg, 0.02 mmol, 10 mol %),  $\text{Ag}_3\text{PO}_4$  (75.3 mg, 0.18 mmol, 0.9 equiv),  $\text{Na}_2\text{CO}_3$  (42.4 mg, 0.4 mmol, 2 equiv) were added. The tube was evacuated and backfilled with Ar for 3 times, then 1,4-dioxane (2 mL) was added with a syringe under Ar and stirred on a pie-block preheated to 130 °C for 8 h. Upon completion, the reaction mixture was cooled to room temperature and concentrated under vacuum, and the residue was purified by silica gel chromatography (PE/EA = 2/1) to afford the product **3a** (56.3 mg, 97%).

## 5. Characterization data of products

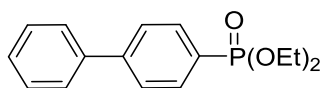

### diethyl [1,1'-biphenyl]-4-ylphosphonate (**3a**)<sup>2</sup>

The title compound was purified by silica gel chromatography (PE/EA = 2/1); yellow oil (56.3 mg, 97%).

$^1\text{H}$  NMR (400 MHz,  $\text{CDCl}_3$ )  $\delta$  7.88 (dd,  $J = 13.0, 8.1$  Hz, 2H), 7.72 – 7.66 (m, 2H), 7.60 (d,  $J = 7.4$  Hz, 2H), 7.46 (t,  $J = 7.5$  Hz, 2H), 7.39 (t,  $J = 7.3$  Hz, 1H), 4.23 – 4.06 (m, 4H), 1.34 (t,  $J = 7.1$  Hz, 6H).  $^{13}\text{C}$  NMR (101 MHz,  $\text{CDCl}_3$ )  $\delta$  145.2 (d,  $J = 3.3$  Hz), 139.9 (d,  $J = 0.9$  Hz), 132.3 (d,  $J = 10.2$  Hz), 128.9, 128.1, 127.2, 127.1 (d,  $J = 15.3$  Hz), 126.8 (d,  $J = 188.8$  Hz), 62.1 (d,  $J = 5.6$  Hz), 16.3 (d,  $J = 6.5$  Hz).  $^{31}\text{P}$  NMR (162 MHz,  $\text{CDCl}_3$ )  $\delta$  18.98. HRMS (ESI-TOF)  $m/z$ :  $[\text{M}+\text{Na}]^+$  calcd for  $\text{C}_{16}\text{H}_{19}\text{O}_3\text{PNa}$ , 313.0970; found, 313.0968.

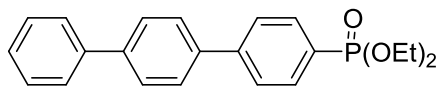

### diethyl [1,1':4',1''-terphenyl]-4-ylphosphonate (**3b**)

The title compound was purified by silica gel chromatography (PE/EA = 2/1); colorless oil (70.3 mg, 96%).

$^1\text{H}$  NMR (600 MHz,  $\text{CDCl}_3$ )  $\delta$  7.91 (dd,  $J = 13.0, 8.0$  Hz, 2H), 7.81 (s, 1H), 7.74 (dd,  $J = 8.0, 3.7$  Hz, 2H), 7.63 (dd,  $J = 12.0, 7.7$  Hz, 3H), 7.59 (d,  $J = 7.7$  Hz, 1H), 7.53 (t,  $J = 7.6$  Hz, 1H), 7.47 (t,  $J = 7.6$  Hz, 2H), 7.38 (t,  $J = 7.3$  Hz, 1H), 4.23 – 4.09 (m, 4H), 1.36 (t,  $J = 7.1$  Hz, 6H).  $^{13}\text{C}$  NMR (151 MHz,  $\text{CDCl}_3$ )  $\delta$  145.1, 142.0, 140.8, 140.5, 132.3 (d,  $J = 10.1$  Hz), 129.3, 128.8, 127.5, 127.3, 127.2, 127.1 (d,  $J = 190.7$  Hz), 126.9, 126.1 (d,  $J = 5.0$  Hz), 62.1 (d,  $J = 5.3$  Hz), 16.3 (d,  $J = 6.4$  Hz).  $^{31}\text{P}$  NMR (243

MHz, CDCl<sub>3</sub>)  $\delta$  18.91. HRMS (ESI-TOF)  $m/z$ : [M+Na]<sup>+</sup> calcd for C<sub>22</sub>H<sub>23</sub>O<sub>3</sub>PNa, 389.1283; found, 389.1286.

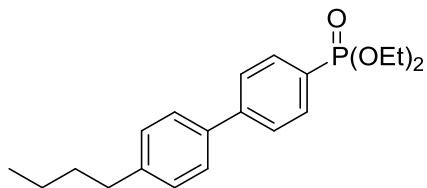

diethyl (4'-butyl-[1,1'-biphenyl]-4-yl)phosphonate (**3c**)

The title compound was purified by silica gel chromatography (PE/EA = 2/1); yellow oil (62.3 mg, 90%).

<sup>1</sup>H NMR (600 MHz, CDCl<sub>3</sub>)  $\delta$  7.86 (dd,  $J$  = 13.0, 7.9 Hz, 2H), 7.67 (dd,  $J$  = 7.8, 3.7 Hz, 2H), 7.52 (d,  $J$  = 7.8 Hz, 2H), 7.27 (d,  $J$  = 7.7 Hz, 2H), 4.21 – 4.06 (m, 4H), 2.66 (t,  $J$  = 7.8 Hz, 2H), 1.67 – 1.60 (m, 2H), 1.39 (dd,  $J$  = 14.9, 7.4 Hz, 2H), 1.34 (t,  $J$  = 7.1 Hz, 6H), 0.95 (t,  $J$  = 7.4 Hz, 3H). <sup>13</sup>C NMR (151 MHz, CDCl<sub>3</sub>)  $\delta$  145.1 (d,  $J$  = 3.1 Hz), 143.1, 137.2, 132.2 (d,  $J$  = 10.4 Hz), 129.0, 127.0, 126.9 (d,  $J$  = 15.3 Hz), 126.6 (d,  $J$  = 190.6 Hz), 62.0 (d,  $J$  = 5.3 Hz), 35.2, 33.5, 22.3, 16.3 (d,  $J$  = 6.3 Hz), 13.8. <sup>31</sup>P NMR (243 MHz, CDCl<sub>3</sub>)  $\delta$  19.07. HRMS (ESI-TOF)  $m/z$ : [M+Na]<sup>+</sup> calcd for C<sub>20</sub>H<sub>27</sub>O<sub>3</sub>PNa, 369.1596; found, 369.1600.

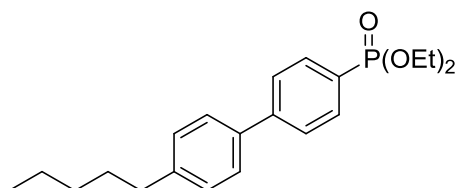

diethyl (4'-pentyl-[1,1'-biphenyl]-4-yl)phosphonate (**3d**)

The title compound was purified by silica gel chromatography (PE/EA = 2/1); yellow oil (61.2 mg, 85%).

<sup>1</sup>H NMR (600 MHz, CDCl<sub>3</sub>)  $\delta$  7.78 (dd,  $J$  = 13.0, 8.1 Hz, 2H), 7.59 (dd,  $J$  = 8.1, 3.8 Hz, 2H), 7.44 (d,  $J$  = 8.0 Hz, 2H), 7.19 (d,  $J$  = 8.1 Hz, 2H), 4.13 – 3.98 (m, 4H), 2.60 – 2.54 (m, 2H), 1.61 – 1.53 (m, 2H), 1.31 – 1.23 (m, 10H), 0.82 (t,  $J$  = 6.9 Hz, 3H). <sup>13</sup>C NMR (151 MHz, CDCl<sub>3</sub>)  $\delta$  145.1 (d,  $J$  = 3.0 Hz), 143.1, 137.2, 132.2 (d,  $J$  = 10.3 Hz), 129.0, 127.0, 126.9 (d,  $J$  = 15.3 Hz), 126.5 (d,  $J$  = 190.8 Hz), 62.0 (d,  $J$  = 5.3 Hz), 35.5, 31.5, 31.0, 22.5, 16.3 (d,  $J$  = 6.4 Hz), 13.9. <sup>31</sup>P NMR (243 MHz, CDCl<sub>3</sub>)  $\delta$  19.12. HRMS (ESI-TOF)  $m/z$ : [M+Na]<sup>+</sup> calcd for C<sub>21</sub>H<sub>29</sub>O<sub>3</sub>PNa, 383.1752; found, 383.1757.

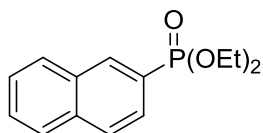

diethyl naphthalen-2-ylphosphonate (**3e**)<sup>3</sup>

The title compound was purified by silica gel chromatography (PE/EA = 2/1); colorless oil (45.9 mg, 87%).

<sup>1</sup>H NMR (400 MHz, CDCl<sub>3</sub>)  $\delta$  8.43 (d,  $J$  = 15.5 Hz, 1H), 7.95 – 7.84 (m, 3H), 7.79 – 7.71 (m, 1H), 7.62 – 7.51 (m, 2H), 4.24 – 4.04 (m, 4H), 1.32 (t,  $J$  = 7.0 Hz, 6H). <sup>13</sup>C NMR (101 MHz, CDCl<sub>3</sub>)  $\delta$  134.9 (d,  $J$  = 2.7 Hz), 134.0 (d,  $J$  = 10.2 Hz), 132.3 (d,  $J$  = 16.5 Hz), 128.8, 128.3 (d,  $J$  = 14.3 Hz),

128.2, 127.7 (d,  $J = 0.7$  Hz), 126.8 (d,  $J = 1.1$  Hz), 126.4 (d,  $J = 9.9$  Hz), 125.3 (d,  $J = 187.9$  Hz), 62.1 (d,  $J = 5.3$  Hz), 16.3 (d,  $J = 6.5$  Hz).  $^{31}\text{P}$  NMR (162 MHz,  $\text{CDCl}_3$ )  $\delta$  19.09. HRMS (ESI-TOF)  $m/z$ :  $[\text{M}+\text{Na}]^+$  calcd for  $\text{C}_{14}\text{H}_{17}\text{O}_3\text{PNa}$ , 287.0813; found, 287.0814.

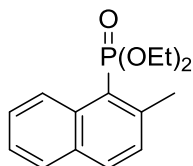

diethyl (2-methylnaphthalen-1-yl)phosphonate (**3f**)

The title compound was purified by silica gel chromatography (PE/EA = 3/1); yellow oil (52.8 mg, 95%).

$^1\text{H}$  NMR (600 MHz,  $\text{CDCl}_3$ )  $\delta$  9.00 (d,  $J = 8.8$  Hz, 1H), 7.87 (d,  $J = 8.4$  Hz, 1H), 7.79 (d,  $J = 8.1$  Hz, 1H), 7.57 – 7.52 (m, 1H), 7.45 (t,  $J = 7.4$  Hz, 1H), 7.34 (dd,  $J = 8.4, 4.6$  Hz, 1H), 4.26 – 4.15 (m, 2H), 4.09 – 3.99 (m, 2H), 2.88 (d,  $J = 2.3$  Hz, 3H), 1.29 (t,  $J = 7.1$  Hz, 6H).  $^{13}\text{C}$  NMR (151 MHz,  $\text{CDCl}_3$ )  $\delta$  144.86 (d,  $J = 10.1$  Hz), 134.5 (d,  $J = 12.8$  Hz), 132.9, 132.1 (d,  $J = 12.7$  Hz), 130.1 (d,  $J = 17.4$  Hz), 128.3, 127.0, 125.2, 121.6 (d,  $J = 177.9$  Hz), 61.5 (d,  $J = 5.2$  Hz), 23.8, 16.3 (d,  $J = 6.7$  Hz).  $^{31}\text{P}$  NMR (243 MHz,  $\text{CDCl}_3$ )  $\delta$  19.63. HRMS (ESI-TOF)  $m/z$ :  $[\text{M}+\text{Na}]^+$  calcd for  $\text{C}_{15}\text{H}_{19}\text{O}_3\text{PNa}$ , 301.0970; found, 301.0974.

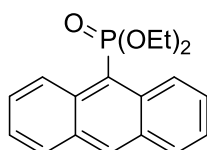

diethyl anthracen-9-ylphosphonate (**3g**)

The title compound was purified by silica gel chromatography (PE/EA = 4/1); yellow oil (53.4 mg, 85%).

$^1\text{H}$  NMR (400 MHz,  $\text{CDCl}_3$ )  $\delta$  9.37 (d,  $J = 9.2$  Hz, 2H), 8.65 (s, 1H), 8.01 (d,  $J = 8.4$  Hz, 2H), 7.65 – 7.57 (m, 2H), 7.54 – 7.45 (m, 2H), 4.32 – 4.21 (m, 2H), 4.10 – 3.83 (m, 2H), 1.27 (t,  $J = 7.1$  Hz, 6H).  $^{13}\text{C}$  NMR (101 MHz,  $\text{CDCl}_3$ )  $\delta$  135.0 (d,  $J = 11.5$  Hz), 134.6 (d,  $J = 4.1$  Hz), 131.0 (d,  $J = 15.2$  Hz), 129.0 (d,  $J = 1.3$  Hz), 127.4 (d,  $J = 1.4$  Hz), 127.3, 125.1, 118.7 (d,  $J = 177.4$  Hz), 61.8 (d,  $J = 4.9$  Hz), 16.3 (d,  $J = 6.7$  Hz).  $^{31}\text{P}$  NMR (162 MHz,  $\text{CDCl}_3$ )  $\delta$  19.61. HRMS (ESI-TOF)  $m/z$ :  $[\text{M}+\text{Na}]^+$  calcd for  $\text{C}_{18}\text{H}_{19}\text{O}_3\text{PNa}$ , 337.0970; found, 337.0967.

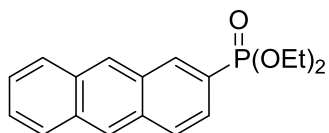

diethyl anthracen-2-ylphosphonate (**3h**)

The title compound was purified by silica gel chromatography (PE/EA = 2/1); yellow oil (48.4 mg, 77%).

$^1\text{H}$  NMR (400 MHz,  $\text{CDCl}_3$ )  $\delta$  8.64 (d,  $J = 16.4$  Hz, 1H), 8.52 (s, 1H), 8.42 (s, 1H), 8.07 – 7.98 (m, 3H), 7.67 (t,  $J = 9.5$  Hz, 1H), 7.51 (p,  $J = 7.0$  Hz, 2H), 4.28 – 4.08 (m, 4H), 1.35 (t,  $J = 7.1$  Hz, 6H).  $^{13}\text{C}$  NMR (101 MHz,  $\text{CDCl}_3$ )  $\delta$  135.4 (d,  $J = 10.0$  Hz), 132.9, 132.1 (d,  $J = 2.6$  Hz), 132.0 (d,  $J = 1.4$  Hz),

130.0 (d,  $J = 17.4$  Hz), 128.7 (d,  $J = 13.9$  Hz), 128.4, 128.1 (d,  $J = 2.5$  Hz), 126.5, 126.3, 125.9, 124.8, 124.70 (d,  $J = 188.6$  Hz), 124.69, 62.2 (d,  $J = 5.3$  Hz), 16.3 (d,  $J = 6.5$  Hz).  $^{31}\text{P}$  NMR (162 MHz,  $\text{CDCl}_3$ )  $\delta$  19.11. HRMS (ESI-TOF)  $m/z$ :  $[\text{M}+\text{Na}]^+$  calcd for  $\text{C}_{18}\text{H}_{19}\text{O}_3\text{PNa}$ , 337.0970; found, 337.0967.

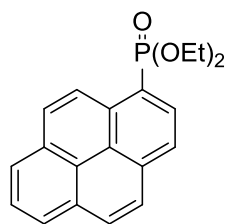

diethyl pyren-1-ylphosphonate (**3i**)<sup>4</sup>

The title compound was purified by silica gel chromatography (PE/EA = 2/1); white solid (56.1 mg, 83%). mp = 71-72 °C.

$^1\text{H}$  NMR (400 MHz,  $\text{CDCl}_3$ )  $\delta$  8.87 (d,  $J = 9.3$  Hz, 1H), 8.68 (dd,  $J = 14.3, 7.9$  Hz, 1H), 8.28 – 8.16 (m, 4H), 8.12 (d,  $J = 8.9$  Hz, 1H), 8.02 (t,  $J = 8.2$  Hz, 2H), 4.33 – 4.21 (m, 2H), 4.20 – 4.07 (m, 2H), 1.33 (t,  $J = 7.0$  Hz, 6H).  $^{13}\text{C}$  NMR (101 MHz,  $\text{CDCl}_3$ )  $\delta$  134.5 (d,  $J = 3.1$  Hz), 132.8 (d,  $J = 10.9$  Hz), 131.8 (d,  $J = 9.4$  Hz), 130.9, 130.3, 129.7, 129.0, 127.1, 126.3, 126.23, 126.17, 125.6 (d,  $J = 5.0$  Hz), 124.6 (d,  $J = 14.4$  Hz), 124.1 (d,  $J = 1.6$  Hz), 123.9 (d,  $J = 15.5$  Hz), 120.9 (d,  $J = 184.5$  Hz), 62.2 (d,  $J = 5.1$  Hz), 16.3 (d,  $J = 6.6$  Hz).  $^{31}\text{P}$  NMR (162 MHz,  $\text{CDCl}_3$ )  $\delta$  19.88. HRMS (ESI-TOF)  $m/z$ :  $[\text{M}+\text{Na}]^+$  calcd for  $\text{C}_{20}\text{H}_{19}\text{O}_3\text{PNa}$ , 361.0970; found, 361.0972.

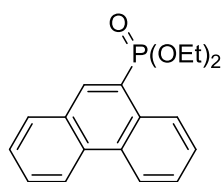

diethyl phenanthren-9-ylphosphonate (**3j**)<sup>5</sup>

The title compound was purified by silica gel chromatography (PE/EA = 2/1); colorless oil (62.2 mg, 99%).

$^1\text{H}$  NMR (400 MHz,  $\text{CDCl}_3$ )  $\delta$  8.71 (d,  $J = 7.3$  Hz, 1H), 8.69 – 8.61 (m, 2H), 8.59 – 8.50 (m, 1H), 7.99 (d,  $J = 7.9$  Hz, 1H), 7.77 – 7.61 (m, 4H), 4.30 – 4.19 (m, 2H), 4.16 – 4.04 (m, 2H), 1.31 (t,  $J = 7.1$  Hz, 6H).  $^{13}\text{C}$  NMR (101 MHz,  $\text{CDCl}_3$ )  $\delta$  138.1 (d,  $J = 8.8$  Hz), 132.2 (d,  $J = 2.8$  Hz), 130.5 (d,  $J = 11.9$  Hz), 130.0, 129.9 (d,  $J = 2.8$  Hz), 129.7 (d,  $J = 3.4$  Hz), 129.1, 127.4 (d,  $J = 3.6$  Hz), 127.1, 127.1, 126.9, 123.2 (d,  $J = 182.4$  Hz), 122.9 (d,  $J = 1.6$  Hz), 122.5, 62.2 (d,  $J = 5.1$  Hz), 16.3 (d,  $J = 6.5$  Hz).  $^{31}\text{P}$  NMR (162 MHz,  $\text{CDCl}_3$ )  $\delta$  19.36. HRMS (ESI-TOF)  $m/z$ :  $[\text{M}+\text{Na}]^+$  calcd for  $\text{C}_{18}\text{H}_{19}\text{O}_3\text{PNa}$ , 337.0970; found, 337.0974.

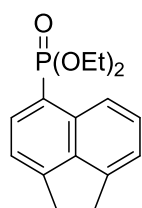

diethyl (1,2-dihydroacenaphthylen-5-yl)phosphonate (**3k**)



The title compound was purified by silica gel chromatography (PE/EA = 2/1); yellow oil (56.3 mg, 97%).

$^1\text{H}$  NMR (600 MHz,  $\text{CDCl}_3$ )  $\delta$  8.17 (dd,  $J = 15.9, 7.1$  Hz, 1H), 8.11 (d,  $J = 8.4$  Hz, 1H), 7.57 – 7.53 (m, 1H), 7.35 (d,  $J = 6.9$  Hz, 1H), 7.34 – 7.31 (m, 1H), 4.18 (dp,  $J = 10.1, 7.2$  Hz, 2H), 4.07 – 4.00 (m, 2H), 3.41 (s, 4H), 1.29 (t,  $J = 7.1$  Hz, 6H).  $^{13}\text{C}$  NMR (151 MHz,  $\text{CDCl}_3$ )  $\delta$  152.5, 146.4, 139.1 (d,  $J = 14.1$  Hz), 136.5 (d,  $J = 11.3$  Hz), 131.1 (d,  $J = 10.8$  Hz), 129.3, 122.0, 120.1, 119.4 (d,  $J = 187.9$  Hz), 118.4 (d,  $J = 16.8$  Hz), 61.8 (d,  $J = 5.0$  Hz), 30.4, 30.2, 16.3 (d,  $J = 6.5$  Hz).  $^{31}\text{P}$  NMR (243 MHz,  $\text{CDCl}_3$ )  $\delta$  19.92. HRMS (ESI-TOF)  $m/z$ :  $[\text{M}+\text{Na}]^+$  calcd for  $\text{C}_{16}\text{H}_{19}\text{O}_3\text{PNa}$ , 313.0970; found, 313.0975.

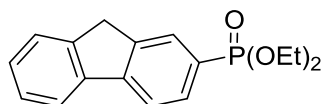

diethyl (9H-fluoren-2-yl)phosphonate (**3l**)<sup>5</sup>

The title compound was purified by silica gel chromatography (PE/EA = 3/1); yellow oil (51.3 mg, 85%).

$^1\text{H}$  NMR (600 MHz,  $\text{CDCl}_3$ )  $\delta$  8.00 (d,  $J = 13.1$  Hz, 1H), 7.88 – 7.81 (m, 3H), 7.57 (d,  $J = 7.3$  Hz, 1H), 7.42 – 7.35 (m, 2H), 4.21 – 4.07 (m, 4H), 3.94 (s, 2H), 1.34 (t,  $J = 7.1$  Hz, 6H).  $^{13}\text{C}$  NMR (151 MHz,  $\text{CDCl}_3$ )  $\delta$  145.8, 143.9, 143.1 (d,  $J = 16.4$  Hz), 140.5, 130.6 (d,  $J = 10.8$  Hz), 128.4 (d,  $J = 10.5$  Hz), 128.0, 127.0, 125.9 (d,  $J = 187.6$  Hz), 125.2, 120.7, 119.8 (d,  $J = 16.5$  Hz), 62.0 (d,  $J = 5.2$  Hz), 36.8, 16.3 (d,  $J = 6.4$  Hz).  $^{31}\text{P}$  NMR (243 MHz,  $\text{CDCl}_3$ )  $\delta$  19.96. HRMS (ESI-TOF)  $m/z$ :  $[\text{M}+\text{Na}]^+$  calcd for  $\text{C}_{17}\text{H}_{19}\text{O}_3\text{PNa}$ , 325.0970; found, 325.0975.

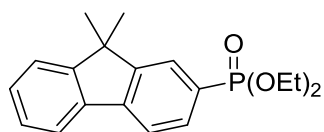

diethyl (9,9-dimethyl-9H-fluoren-2-yl)phosphonate (**3m**)<sup>5</sup>

The title compound was purified by silica gel chromatography (PE/EA = 2/1); yellow oil (55.4 mg, 84%).

$^1\text{H}$  NMR (400 MHz,  $\text{CDCl}_3$ )  $\delta$  7.90 (d,  $J = 13.2$  Hz, 1H), 7.76 (dd,  $J = 12.2, 6.5$  Hz, 3H), 7.44 (d,  $J = 5.1$  Hz, 1H), 7.39 – 7.31 (m, 2H), 4.23 – 4.03 (m, 4H), 1.49 (s, 6H), 1.33 (t,  $J = 7.1$  Hz, 6H).  $^{13}\text{C}$  NMR (101 MHz,  $\text{CDCl}_3$ )  $\delta$  154.2, 153.4 (d,  $J = 15.4$  Hz), 143.3 (d,  $J = 3.1$  Hz), 137.8, 130.7 (d,  $J = 10.8$  Hz), 128.4, 127.1, 126.3 (d,  $J = 188.2$  Hz), 126.2 (d,  $J = 10.7$  Hz), 122.7, 120.7, 119.8 (d,  $J = 16.3$  Hz), 62.0 (d,  $J = 5.4$  Hz), 47.0 (d,  $J = 1.8$  Hz), 26.8, 16.3 (d,  $J = 6.5$  Hz).  $^{31}\text{P}$  NMR (162 MHz,  $\text{CDCl}_3$ )  $\delta$  20.05. HRMS (ESI-TOF)  $m/z$ :  $[\text{M}+\text{H}]^+$  calcd for  $\text{C}_{19}\text{H}_{24}\text{O}_3\text{P}$ , 331.1463; found, 331.1459.

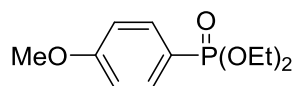

diethyl (4-methoxyphenyl)phosphonate (**3n**)<sup>7</sup>

The title compound was purified by silica gel chromatography (PE/EA = 2/1); colorless oil (41.5 mg, 85%).

$^1\text{H}$  NMR (400 MHz,  $\text{CDCl}_3$ )  $\delta$  7.74 (dd,  $J = 12.7, 8.7$  Hz, 2H), 6.96 (dd,  $J = 8.5, 2.9$  Hz, 2H), 4.18 – 3.98 (m, 4H), 3.84 (s, 3H), 1.30 (t,  $J = 7.0$  Hz, 6H).  $^{13}\text{C}$  NMR (101 MHz,  $\text{CDCl}_3$ )  $\delta$  162.8, 133.8 (d,  $J =$

11.3 Hz), 119.5 (d,  $J = 194.1$  Hz), 114.0 (d,  $J = 16.0$  Hz), 61.88 (d,  $J = 5.2$  Hz), 55.3, 16.31 (d,  $J = 6.6$  Hz).  $^{31}\text{P}$  NMR (162 MHz,  $\text{CDCl}_3$ )  $\delta$  19.73. HRMS (ESI-TOF)  $m/z$ :  $[\text{M}+\text{Na}]^+$  calcd for  $\text{C}_{11}\text{H}_{17}\text{O}_4\text{PNa}$ , 267.0762; found, 267.0764.

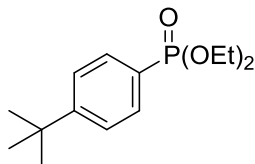

diethyl (4-(tert-butyl)phenyl)phosphonate (**3o**)<sup>2</sup>

The title compound was purified by silica gel chromatography (PE/EA = 2/1); colorless oil (50.2 mg, 93%).

$^1\text{H}$  NMR (600 MHz,  $\text{CDCl}_3$ )  $\delta$  7.71 (dd,  $J = 13.0, 8.4$  Hz, 2H), 7.48 – 7.41 (m, 2H), 4.15 – 3.98 (m, 4H), 1.33 – 1.26 (m, 15H).  $^{13}\text{C}$  NMR (151 MHz,  $\text{CDCl}_3$ )  $\delta$  155.8, 131.6 (d,  $J = 10.5$  Hz), 125.4 (d,  $J = 15.2$  Hz), 124.9 (d,  $J = 189.8$  Hz), 61.9 (d,  $J = 5.2$  Hz), 35.0, 31.0, 16.3 (d,  $J = 6.5$  Hz).  $^{31}\text{P}$  NMR (243 MHz,  $\text{CDCl}_3$ )  $\delta$  19.47. HRMS (ESI-TOF)  $m/z$ :  $[\text{M}+\text{Na}]^+$  calcd for  $\text{C}_{14}\text{H}_{23}\text{O}_3\text{PNa}$ , 293.1283; found, 293.1288.

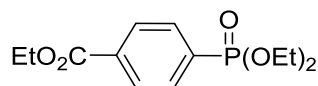

ethyl 4-(diethoxyphosphoryl)benzoate (**3p**)<sup>3</sup>

The title compound was purified by silica gel chromatography (PE/EA = 2/1); colorless oil (52.1 mg, 91%).

$^1\text{H}$  NMR (400 MHz,  $\text{CDCl}_3$ )  $\delta$  8.09 (dd,  $J = 7.8, 3.6$  Hz, 2H), 7.85 (dd,  $J = 12.9, 8.1$  Hz, 2H), 4.36 (q,  $J = 7.1$  Hz, 2H), 4.10 (qd,  $J = 17.2, 9.7$  Hz, 4H), 1.37 (t,  $J = 7.1$  Hz, 3H), 1.29 (t,  $J = 7.1$  Hz, 6H).  $^{13}\text{C}$  NMR (101 MHz,  $\text{CDCl}_3$ )  $\delta$  165.6, 133.8 (d,  $J = 3.3$  Hz), 131.7 (d,  $J = 10.0$  Hz), 129.3 (d,  $J = 15.0$  Hz), 133.0 (d,  $J = 186.4$  Hz), 62.3 (d,  $J = 5.4$  Hz), 61.34, 16.2 (d,  $J = 6.4$  Hz), 14.18.  $^{31}\text{P}$  NMR (162 MHz,  $\text{CDCl}_3$ )  $\delta$  17.08. HRMS (ESI-TOF)  $m/z$ :  $[\text{M}+\text{Na}]^+$  calcd for  $\text{C}_{13}\text{H}_{19}\text{O}_5\text{PNa}$ , 309.0868; found, 309.0865.

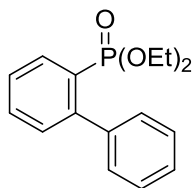

diethyl [1,1'-biphenyl]-2-ylphosphonate (**3q**)<sup>8</sup>

The title compound was purified by silica gel chromatography (PE/EA = 2/1); yellow oil (51.0 mg, 88%).

$^1\text{H}$  NMR (600 MHz,  $\text{CDCl}_3$ )  $\delta$  8.04 (ddd,  $J = 14.3, 7.7, 1.0$  Hz, 1H), 7.55 (dd,  $J = 10.7, 4.4$  Hz, 1H), 7.46 – 7.41 (m, 3H), 7.40 – 7.34 (m, 3H), 7.32 (dd,  $J = 9.7, 3.4$  Hz, 1H), 3.92 (dp,  $J = 10.1, 7.1$  Hz, 2H), 3.86 – 3.79 (m, 2H), 1.12 (t,  $J = 7.1$  Hz, 6H).  $^{13}\text{C}$  NMR (151 MHz,  $\text{CDCl}_3$ )  $\delta$  146.0 (d,  $J = 9.7$  Hz), 141.4 (d,  $J = 4.2$  Hz), 133.8 (d,  $J = 9.8$  Hz), 131.9, 131.30 (d,  $J = 14.1$  Hz), 129.3, 127.42, 127.37, 127.0 (d,  $J = 187.7$  Hz), 126.9, 126.8, 61.7 (d,  $J = 6.0$  Hz), 16.0 (d,  $J = 6.8$  Hz).  $^{31}\text{P}$  NMR (243 MHz,  $\text{CDCl}_3$ )  $\delta$  18.12. HRMS (ESI-TOF)  $m/z$ :  $[\text{M}+\text{Na}]^+$  calcd for  $\text{C}_{16}\text{H}_{19}\text{O}_3\text{PNa}$ , 313.0970; found, 313.0974.

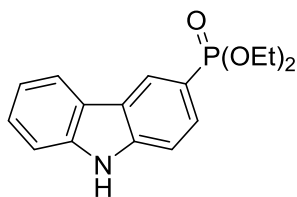

diethyl (9H-carbazol-3-yl)phosphonate (**3r**)

The title compound was purified by silica gel chromatography (PE/EA = 2/1); yellow oil (27.9 mg, 46%).

$^1\text{H}$  NMR (400 MHz,  $\text{CDCl}_3$ )  $\delta$  9.27 (s, 1H), 8.59 (d,  $J = 13.9$  Hz, 1H), 8.07 (d,  $J = 7.8$  Hz, 1H), 7.85 – 7.77 (m, 1H), 7.52 – 7.39 (m, 3H), 7.26 (dd,  $J = 8.4, 6.3$  Hz, 1H), 4.24 – 4.04 (m, 4H), 1.33 (t,  $J = 7.1$  Hz, 6H).  $^{13}\text{C}$  NMR (101 MHz,  $\text{CDCl}_3$ )  $\delta$  142.0 (d,  $J = 2.8$  Hz), 139.9, 128.7 (d,  $J = 11.8$  Hz), 126.6, 125.2 (d,  $J = 11.7$  Hz), 123.2 (d,  $J = 17.6$  Hz), 122.8 (d,  $J = 1.7$  Hz), 120.6, 120.1, 119.0 (d,  $J = 181.9$  Hz), 111.0, 110.9 (d,  $J = 16.5$  Hz), 62.0 (d,  $J = 5.1$  Hz), 16.4 (d,  $J = 6.6$  Hz).  $^{31}\text{P}$  NMR (162 MHz,  $\text{CDCl}_3$ )  $\delta$  21.78. HRMS (ESI-TOF)  $m/z$ :  $[\text{M}+\text{Na}]^+$  calcd for  $\text{C}_{16}\text{H}_{18}\text{NO}_3\text{PNa}$ , 326.0922; found, 326.0924.

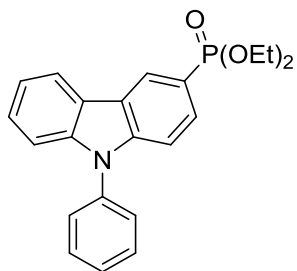

diethyl (9-phenyl-9H-carbazol-3-yl)phosphonate (**3s**)<sup>9</sup>

The title compound was purified by silica gel chromatography (PE/EA = 2/1); yellow oil (65.9 mg, 87%).

$^1\text{H}$  NMR (600 MHz,  $\text{CDCl}_3$ )  $\delta$  8.68 (d,  $J = 13.8$  Hz, 1H), 8.19 (d,  $J = 7.8$  Hz, 1H), 7.85 – 7.78 (m, 1H), 7.62 (t,  $J = 7.7$  Hz, 2H), 7.56 – 7.49 (m, 3H), 7.47 – 7.42 (m, 2H), 7.39 (d,  $J = 8.2$  Hz, 1H), 7.34 (t,  $J = 7.4$  Hz, 1H), 4.24 – 4.15 (m, 2H), 4.11 (dp,  $J = 10.0, 7.1$  Hz, 2H), 1.35 (t,  $J = 7.1$  Hz, 6H).  $^{13}\text{C}$  NMR (151 MHz,  $\text{CDCl}_3$ )  $\delta$  143.1, 141.4, 137.0, 130.0, 129.0 (d,  $J = 11.9$  Hz), 128.0, 127.1, 126.7, 125.3 (d,  $J = 11.7$  Hz), 123.2 (d,  $J = 17.5$  Hz), 122.9, 120.8, 120.6, 118.3 (d,  $J = 191.6$  Hz), 110.1, 109.9 (d,  $J = 16.2$  Hz), 61.9 (d,  $J = 5.0$  Hz), 16.3 (d,  $J = 6.5$  Hz).  $^{31}\text{P}$  NMR (243 MHz,  $\text{CDCl}_3$ )  $\delta$  21.25. HRMS (ESI-TOF)  $m/z$ :  $[\text{M}+\text{Na}]^+$  calcd for  $\text{C}_{22}\text{H}_{22}\text{NO}_3\text{PNa}$ , 402.1235; found, 402.1240.

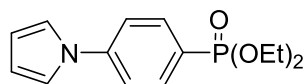

diethyl (4-(1H-pyrrol-1-yl)phenyl)phosphonate (**3t**)

The title compound was purified by silica gel chromatography (PE/EA = 2/1); yellow oil (46.9 mg, 84%).

$^1\text{H}$  NMR (600 MHz,  $\text{CDCl}_3$ )  $\delta$  7.85 (dd,  $J = 12.8, 8.5$  Hz, 2H), 7.46 (dd,  $J = 8.5, 3.2$  Hz, 2H), 7.15 – 7.11 (m, 2H), 6.39 – 6.33 (m, 2H), 4.19 – 4.05 (m, 4H), 1.32 (t,  $J = 7.1$  Hz, 6H).  $^{13}\text{C}$  NMR (151 MHz,  $\text{CDCl}_3$ )  $\delta$  143.5 (d,  $J = 3.3$  Hz), 133.4 (d,  $J = 10.7$  Hz), 124.9 (d,  $J = 193.3$  Hz), 119.5 (d,  $J = 15.6$  Hz),

118.9, 111.4, 62.1 (d,  $J = 5.3$  Hz), 16.3 (d,  $J = 6.4$  Hz).  $^{31}\text{P}$  NMR (243 MHz,  $\text{CDCl}_3$ )  $\delta$  18.21. HRMS (ESI-TOF)  $m/z$ :  $[\text{M}+\text{Na}]^+$  calcd for  $\text{C}_{14}\text{H}_{18}\text{NO}_3\text{PNa}$ , 302.0922; found, 302.0927.

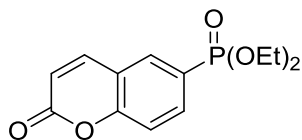

diethyl (2-oxo-2H-chromen-6-yl)phosphonate (**3u**)

The title compound was purified by silica gel chromatography (PE/EA = 2/1); colorless oil (44.0 mg, 78%).

$^1\text{H}$  NMR (400 MHz,  $\text{CDCl}_3$ )  $\delta$  7.98 (d,  $J = 13.5$  Hz, 1H), 7.92 – 7.84 (m, 1H), 7.73 (d,  $J = 9.6$  Hz, 1H), 7.38 (dd,  $J = 8.5, 2.9$  Hz, 1H), 6.47 (d,  $J = 9.6$  Hz, 1H), 4.11 (tdd,  $J = 17.2, 9.8, 7.7$  Hz, 4H), 1.31 (t,  $J = 7.1$  Hz, 6H).  $^{13}\text{C}$  NMR (101 MHz,  $\text{CDCl}_3$ )  $\delta$  159.7, 156.4 (d,  $J = 3.4$  Hz), 142.8, 134.5 (d,  $J = 10.4$  Hz), 132.4 (d,  $J = 11.5$  Hz), 125.0 (d,  $J = 192.8$  Hz), 118.7 (d,  $J = 16.9$  Hz), 117.6, 117.3 (d,  $J = 15.0$  Hz), 62.4 (d,  $J = 5.5$  Hz), 16.3 (d,  $J = 6.4$  Hz).  $^{31}\text{P}$  NMR (162 MHz,  $\text{CDCl}_3$ )  $\delta$  16.60. HRMS (ESI-TOF)  $m/z$ :  $[\text{M}+\text{Na}]^+$  calcd for  $\text{C}_{13}\text{H}_{15}\text{O}_5\text{PNa}$ , 305.0555; found, 305.0554.

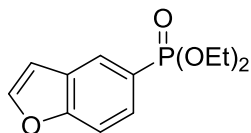

diethyl benzofuran-5-ylphosphonate (**3v**)

The title compound was purified by silica gel chromatography (PE/EA = 2/1); yellow oil (40.6 mg, 80%).

$^1\text{H}$  NMR (400 MHz,  $\text{CDCl}_3$ )  $\delta$  8.13 (d,  $J = 13.8$  Hz, 1H), 7.78 – 7.66 (m, 2H), 7.58 (dd,  $J = 8.2, 2.0$  Hz, 1H), 6.83 (s, 1H), 4.11 (tdd,  $J = 17.2, 9.9, 7.7$  Hz, 4H), 1.32 (t,  $J = 7.0$  Hz, 6H).  $^{13}\text{C}$  NMR (101 MHz,  $\text{CDCl}_3$ )  $\delta$  157.0 (d,  $J = 3.3$  Hz), 146.1, 127.6 (d,  $J = 11.9$  Hz), 127.5 (d,  $J = 18.6$  Hz), 126.2 (d,  $J = 11.6$  Hz), 122.4 (d,  $J = 190.1$  Hz), 111.8 (d,  $J = 16.7$  Hz), 106.8, 62.1 (d,  $J = 5.3$  Hz), 16.3 (d,  $J = 6.6$  Hz).  $^{31}\text{P}$  NMR (162 MHz,  $\text{CDCl}_3$ )  $\delta$  19.96. HRMS (ESI-TOF)  $m/z$ :  $[\text{M}+\text{Na}]^+$  calcd for  $\text{C}_{12}\text{H}_{15}\text{O}_4\text{PNa}$ , 277.0606; found, 277.0609.

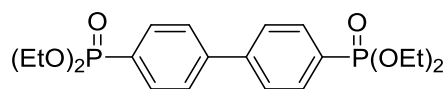

tetraethyl [1,1'-biphenyl]-4,4'-diylbis(phosphonate) (**3w**)<sup>10</sup>

The title compound was purified by silica gel chromatography (PE/EA = 1/1); white solid (27.3 mg, 32%). mp = 45-46 °C.

$^1\text{H}$  NMR (400 MHz,  $\text{CDCl}_3$ )  $\delta$  7.88 (dd,  $J = 12.8, 8.2$  Hz, 4H), 7.68 (dd,  $J = 11.4, 9.7$  Hz, 4H), 4.24 – 4.01 (m, 8H), 1.32 (t,  $J = 7.0$  Hz, 12H).  $^{13}\text{C}$  NMR (101 MHz,  $\text{CDCl}_3$ )  $\delta$  143.8 (d,  $J = 3.3$  Hz), 132.3 (d,  $J = 10.2$  Hz), 127.9 (d,  $J = 189.5$  Hz), 127.2 (d,  $J = 15.2$  Hz), 62.1 (d,  $J = 5.5$  Hz), 16.3 (d,  $J = 6.5$  Hz).  $^{31}\text{P}$  NMR (162 MHz,  $\text{CDCl}_3$ )  $\delta$  18.41. HRMS (ESI-TOF)  $m/z$ :  $[\text{M}+\text{Na}]^+$  calcd for  $\text{C}_{20}\text{H}_{28}\text{O}_6\text{P}_2\text{Na}$ , 449.1259; found, 449.1254.

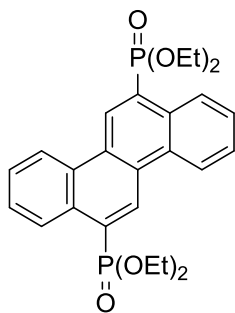

tetraethyl chrysene-6,12-diylbis(phosphonate) (**3xa**)

The title compound was purified by silica gel chromatography (PE/EA = 1/1); yellow oil (27.0 mg, 27%).

$^1\text{H}$  NMR (400 MHz,  $\text{CDCl}_3$ )  $\delta$  9.60 (d,  $J$  = 18.5 Hz, 2H), 8.98 (d,  $J$  = 8.2 Hz, 2H), 8.65 (d,  $J$  = 8.2 Hz, 2H), 7.78 (dt,  $J$  = 15.0, 7.2 Hz, 4H), 4.36 – 4.23 (m, 4H), 4.20 – 4.06 (m, 4H), 1.34 (t,  $J$  = 7.1 Hz, 12H).  $^{13}\text{C}$  NMR (101 MHz,  $\text{CDCl}_3$ )  $\delta$  131.1, 131.0, 130.8, 130.4 (d,  $J$  = 10.6 Hz), 129.1 (d,  $J$  = 3.1 Hz), 128.9 (d,  $J$  = 3.0 Hz), 127.7 (d,  $J$  = 6.1 Hz), 127.4 (d,  $J$  = 3.8 Hz), 126.4 (d,  $J$  = 181.7 Hz), 123.8, 62.5 (d,  $J$  = 5.2 Hz), 16.4 (d,  $J$  = 6.5 Hz).  $^{31}\text{P}$  NMR (162 MHz,  $\text{CDCl}_3$ )  $\delta$  18.96. HRMS (ESI-TOF)  $m/z$ :  $[\text{M}+\text{Na}]^+$  calcd for  $\text{C}_{26}\text{H}_{30}\text{O}_6\text{P}_2\text{Na}$ , 523.1415; found, 523.1412.

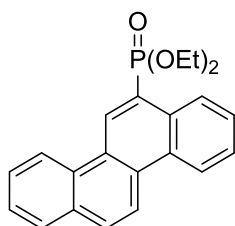

diethyl chrysen-6-ylphosphonate (**3xb**)

The title compound was purified by silica gel chromatography (PE/EA = 2/1); yellow oil (31.3 mg, 43%).

$^1\text{H}$  NMR (400 MHz,  $\text{CDCl}_3$ )  $\delta$  9.61 (d,  $J$  = 18.5 Hz, 1H), 8.93 (d,  $J$  = 8.4 Hz, 1H), 8.83 (d,  $J$  = 7.8 Hz, 1H), 8.68 (dd,  $J$  = 18.3, 8.7 Hz, 2H), 8.11 (d,  $J$  = 9.1 Hz, 1H), 8.00 (d,  $J$  = 7.9 Hz, 1H), 7.75 (dd,  $J$  = 15.0, 7.5 Hz, 3H), 7.67 (t,  $J$  = 7.4 Hz, 1H), 4.35 – 4.23 (m, 2H), 4.20 – 4.08 (m, 2H), 1.35 (t,  $J$  = 7.1 Hz, 6H).  $^{13}\text{C}$  NMR (101 MHz,  $\text{CDCl}_3$ )  $\delta$  133.6, 132.1 (d,  $J$  = 0.9 Hz), 131.7 (d,  $J$  = 9.9 Hz), 131.1 (d,  $J$  = 2.9 Hz), 130.8 (d,  $J$  = 12.5 Hz), 130.6, 130.4 (d,  $J$  = 10.6 Hz), 130.1, 128.5, 127.4, 127.4, 127.1, 126.9 (d,  $J$  = 13.6 Hz), 126.2 (d,  $J$  = 16.7 Hz), 123.6 (d,  $J$  = 1.6 Hz), 123.29, 123.25 (d,  $J$  = 182.8 Hz), 120.7, 62.3 (d,  $J$  = 5.1 Hz), 16.4 (d,  $J$  = 6.5 Hz).  $^{31}\text{P}$  NMR (162 MHz,  $\text{CDCl}_3$ )  $\delta$  19.86. HRMS (ESI-TOF)  $m/z$ :  $[\text{M}+\text{Na}]^+$  calcd for  $\text{C}_{22}\text{H}_{21}\text{O}_3\text{PNa}$ , 387.1126; found, 387.1125.

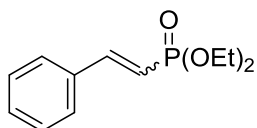

diethyl styrylphosphonate (**3y**)<sup>11</sup>

The title compound was purified by silica gel chromatography (PE/EA = 2/1); yellow oil (35.0 mg, 73%), *E-Z* stereoselectivity determined by  $^{31}\text{P}$  NMR (*E/Z* = 8:5).

$^1\text{H}$  NMR (400 MHz,  $\text{CDCl}_3$ )  $\delta$  7.68 (d,  $J = 7.0$  Hz, 2H), 7.57 – 7.32 (m, 10H), 6.26 (t,  $J = 17.6$  Hz, 1H), 5.81 (t,  $J = 14.9$  Hz, 1H), 4.18 – 4.09 (m, 4H), 4.06 – 3.93 (m, 4H), 1.36 (t,  $J = 7.0$  Hz, 6H), 1.19 (t,  $J = 7.1$  Hz, 6H).  $^{13}\text{C}$  NMR (101 MHz,  $\text{CDCl}_3$ )  $\delta$  148.9 (d,  $J = 6.9$  Hz), 148.4 (d,  $J = 1.6$  Hz), 135.2 (d,  $J = 8.9$  Hz), 134.8 (d,  $J = 22.8$  Hz), 130.2, 129.5, 129.3, 128.8, 128.1, 127.7, 116.5 (d,  $J = 185.4$  Hz), 113.8 (d,  $J = 191.3$  Hz), 61.82 (d,  $J = 7.5$  Hz), 61.76 (d,  $J = 5.9$  Hz), 16.4 (d,  $J = 6.5$  Hz), 16.1 (d,  $J = 6.7$  Hz).  $^{31}\text{P}$  NMR (162 MHz,  $\text{CDCl}_3$ )  $\delta$  19.56, 16.03. HRMS (ESI-TOF)  $m/z$ :  $[\text{M}+\text{Na}]^+$  calcd for  $\text{C}_{12}\text{H}_{17}\text{O}_3\text{NaP}$ , 263.0813; found, 263.0817.

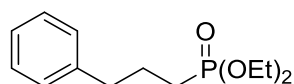

diethyl (3-phenylpropyl)phosphonate (**3z**)<sup>12</sup>

The title compound was purified by silica gel chromatography (PE/EA = 2/1); yellow oil (17.4 mg, 34%).

$^1\text{H}$  NMR (400 MHz,  $\text{CDCl}_3$ )  $\delta$  7.28 (t,  $J = 7.3$  Hz, 2H), 7.18 (t,  $J = 9.3$  Hz, 3H), 4.07 (dt,  $J = 7.1$ , 6.1 Hz, 4H), 2.69 (t,  $J = 7.5$  Hz, 2H), 2.00 – 1.85 (m, 2H), 1.79 – 1.67 (m, 2H), 1.30 (t,  $J = 7.0$  Hz, 6H).  $^{13}\text{C}$  NMR (101 MHz,  $\text{CDCl}_3$ )  $\delta$  141.0, 128.4, 128.4, 126.0, 61.4 (d,  $J = 6.5$  Hz), 36.4 (d,  $J = 17.2$  Hz), 25.0 (d,  $J = 141.0$  Hz), 24.1 (d,  $J = 4.8$  Hz), 16.4 (d,  $J = 6.0$  Hz).  $^{31}\text{P}$  NMR (162 MHz,  $\text{CDCl}_3$ )  $\delta$  32.16. HRMS (ESI-TOF)  $m/z$ :  $[\text{M}+\text{Na}]^+$  calcd for  $\text{C}_{13}\text{H}_{21}\text{O}_3\text{PNa}$ , 279.1126; found, 279.1123.

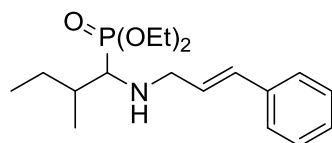

diethyl (1-(cinnamylamino)-2-methylbutyl)phosphonate (**4**)

The title compound was purified by silica gel chromatography (PE/EA = 3/1); yellow oil (40.0 mg, 59%, dr = 4:3); diastereoselectivity determined by  $^{31}\text{P}$  NMR.

$^1\text{H}$  NMR (400 MHz,  $\text{CDCl}_3$ )  $\delta$  7.34 (d,  $J = 7.4$  Hz, 2H), 7.31 – 7.25 (m, 2H), 7.19 (t,  $J = 7.2$  Hz, 1H), 6.51 (d,  $J = 15.9$  Hz, 1H), 6.28 – 6.09 (m, 1H), 4.23 – 4.04 (m, 4H), 3.67 – 3.54 (m, 1H), 3.47 (dd,  $J = 13.9$ , 6.6 Hz, 1H), 2.87 (ddd,  $J = 19.5$ , 15.7, 2.9 Hz, 1H), 1.83 (dd,  $J = 14.1$ , 6.9 Hz, 1H), 1.74 – 1.61 (m, 1H), 1.61 – 1.38 (m, 1H), 1.38 – 1.22 (m, 7H), 1.01 (dd,  $J = 22.8$ , 6.8 Hz, 3H), 0.88 (q,  $J = 7.6$  Hz, 3H).  $^{13}\text{C}$  NMR (101 MHz,  $\text{CDCl}_3$ )  $\delta$  137.0, 131.5, 128.4, 128.3, 127.3, 126.1, 61.6 (d,  $J = 7.3$  Hz), 61.5 (d,  $J = 7.4$  Hz), 58.9 (d,  $J = 143.8$  Hz), 56.8 (d,  $J = 141.4$  Hz), 51.4 (d,  $J = 3.6$  Hz), 51.1 (d,  $J = 5.5$  Hz), 36.1 (d,  $J = 5.2$  Hz), 35.7 (d,  $J = 5.1$  Hz), 27.3, 27.1, 16.53 (d,  $J = 2.8$  Hz), 16.47 (d,  $J = 2.8$  Hz), 14.9, 12.0.  $^{31}\text{P}$  NMR (162 MHz,  $\text{CDCl}_3$ )  $\delta$  29.05, 28.14. HRMS (ESI-TOF)  $m/z$ :  $[\text{M}+\text{Na}]^+$  calcd for  $\text{C}_{18}\text{H}_{30}\text{NO}_3\text{PNa}$ , 362.1861; found, 362.1858.

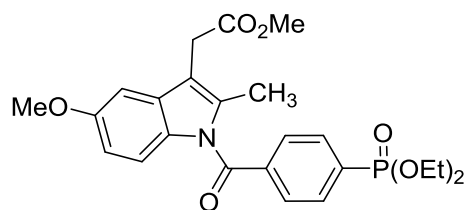

methyl 2-(1-(4-(diethoxyphosphoryl)benzoyl)-5-methoxy-2-methyl-1H-indol-3-yl)acetate (**3bb**)

The title compound was purified by silica gel chromatography (PE/EA = 2/1); yellow oil (39.8 mg, 42%).

$^1\text{H}$  NMR (600 MHz,  $\text{CDCl}_3$ )  $\delta$  7.94 (dd,  $J = 12.9, 7.9$  Hz, 2H), 7.78 (dd,  $J = 7.8, 3.7$  Hz, 2H), 6.96 (d,  $J = 2.2$  Hz, 1H), 6.89 (d,  $J = 9.0$  Hz, 1H), 6.66 (dd,  $J = 9.0, 2.2$  Hz, 1H), 4.24 – 4.12 (m, 4H), 3.84 (s, 3H), 3.71 (s, 3H), 3.67 (s, 2H), 2.35 (s, 3H), 1.36 (t,  $J = 7.1$  Hz, 6H).  $^{13}\text{C}$  NMR (151 MHz,  $\text{CDCl}_3$ )  $\delta$  171.2, 168.4, 156.2, 139.2, 135.8, 133.1 (d,  $J = 187.5$  Hz), 132.0 (d,  $J = 9.9$  Hz), 130.7 (d,  $J = 9.3$  Hz), 129.2 (d,  $J = 14.9$  Hz), 115.1, 112.9, 111.7, 101.4, 62.5 (d,  $J = 5.6$  Hz), 55.7, 52.1, 30.1, 16.3 (d,  $J = 6.0$  Hz), 13.5.  $^{31}\text{P}$  NMR (243 MHz,  $\text{CDCl}_3$ )  $\delta$  16.48. HRMS (ESI-TOF)  $m/z$ :  $[\text{M}+\text{Na}]^+$  calcd for  $\text{C}_{24}\text{H}_{29}\text{N O}_7\text{P}$ , 474.1682; found, 474.1687.

## 6. Preliminary mechanistic studies

### 6.1 Control experiments

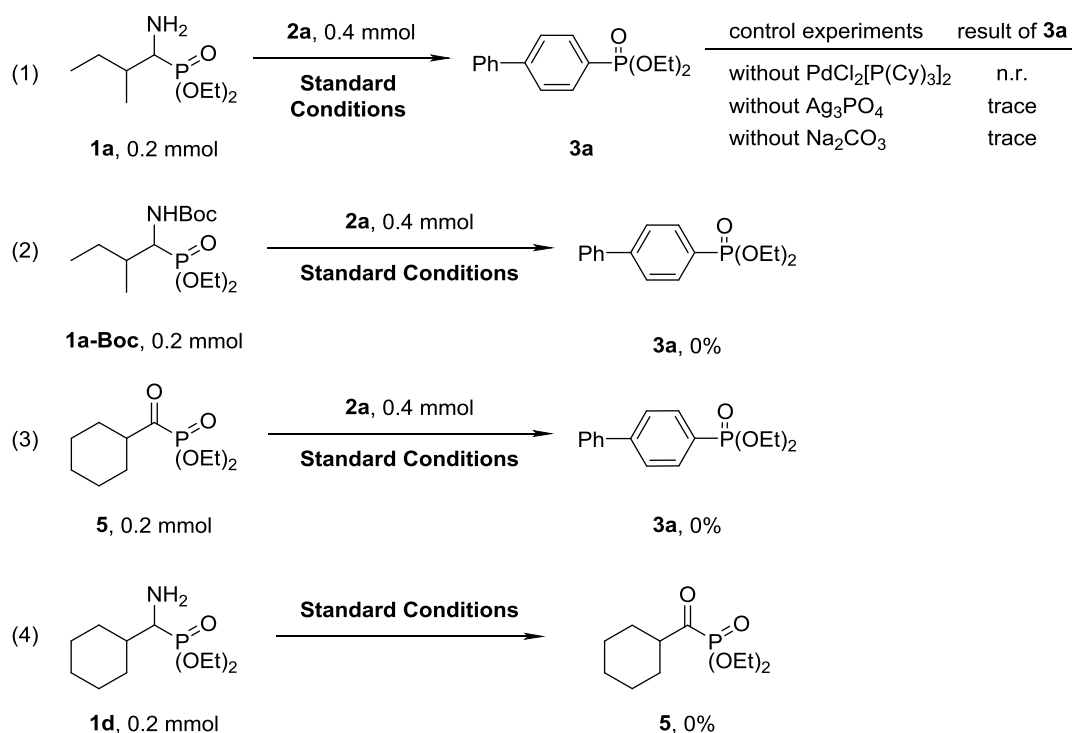

Controlled experiments 1-4 were carried out with **1a**, **1a-Boc**, or **1d** (0.2 mmol, 1.0 equiv) under Standard Conditions. The procedure was performed as in General procedure, but the results were monitored by TLC.

### 6.2 Radical-trapping experiments

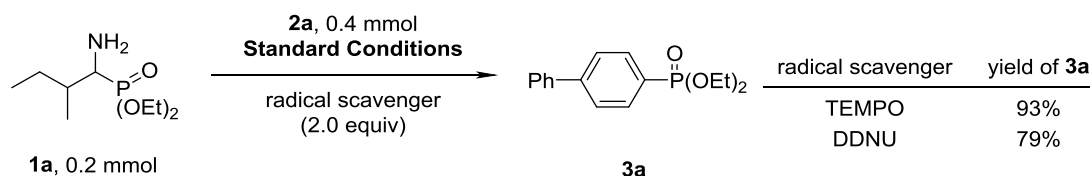

Under the Standard Conditions, 2.0 equivalents of radical scavengers were added into the mixture. After the reaction finished, the mixture was concentrated under vacuum, and the residue was purified by silica gel chromatography (PE/EA = 2/1) to afford the product **3a**, respectively.

### 6.3 Analytical data of ESI-MS

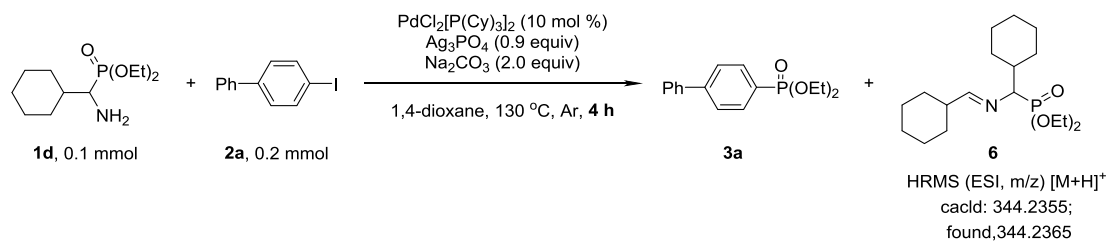

In a 10 mL Schlenk tube containing a magnetic stir bar, **1d** (24.9mg, 0.1 mmol, 1.0 equiv), **2a** (56.0 mg, 0.2 mmol, 2.0 equiv),  $\text{PdCl}_2[\text{P}(\text{Cy})_3]_2$  (7.4 mg, 0.01 mmol, 10 mol %),  $\text{Ag}_3\text{PO}_4$  (37.7 mg, 0.09 mmol, 0.9 equiv),  $\text{Na}_2\text{CO}_3$  (21.2 mg, 0.2 mmol, 2 equiv) were added. The tube was evacuated and backfilled with Ar for 3 times, then 1,4-dioxane (1 mL) was added with a syringe under Ar and stirred on a pie-block preheated to 130 °C for 4 h. The reaction was cooled to room temperature, concentrated under vacuum, and diluted with  $\text{CH}_3\text{CN}$  prior to the injection into the mass spectrometer.

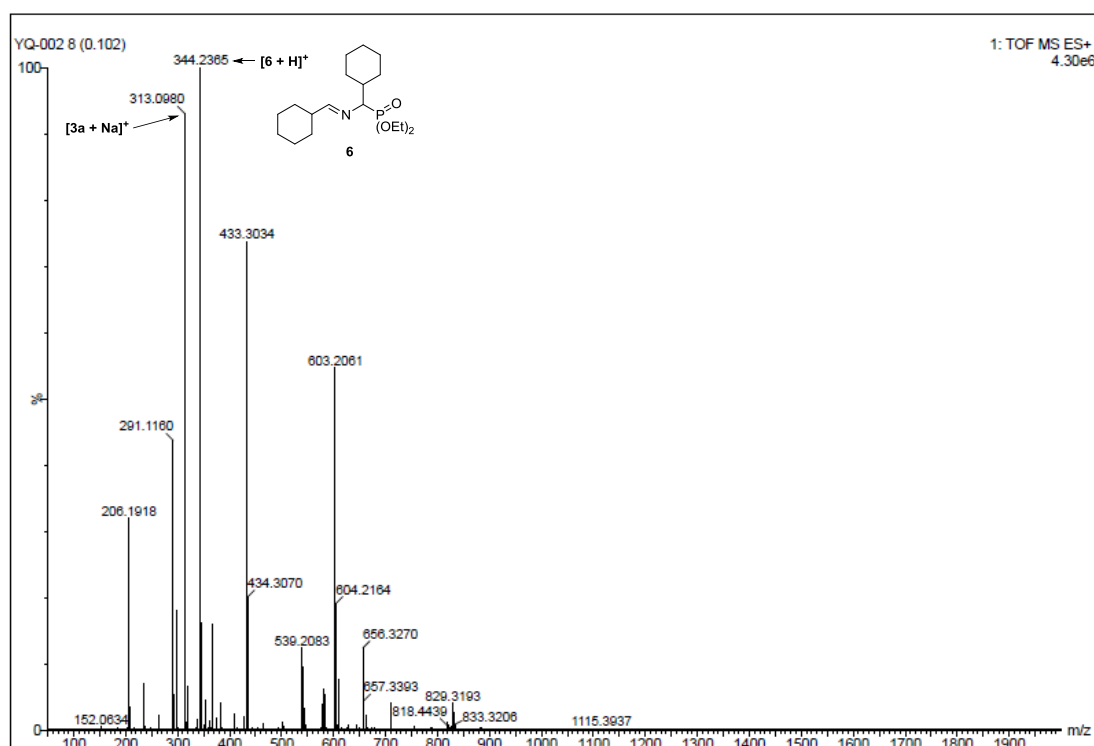

## 6.4 Proposed mechanism

Based on these results and previous reports on C-P bonds cleavage,<sup>13</sup> a reaction mechanism was proposed. Firstly,  $\text{Pd}^{\text{II}}$  was reduced to form  $\text{Pd}^0$  *in situ*, followed by oxidative addition with halogenates to produce **Int-A**. On the other hand, the aminophosphonate was decomposed to phosphonate amine salt and aldehyde or ketone. Subsequently, the phosphonate amine salt immediately generated **Int-B** with silver salt, which was transmetalized with **Int-A** to give **Int-C**. Ultimately, reductive elimination produced  $\text{Pd}^0$  and C-P bond functionalized product **3**.



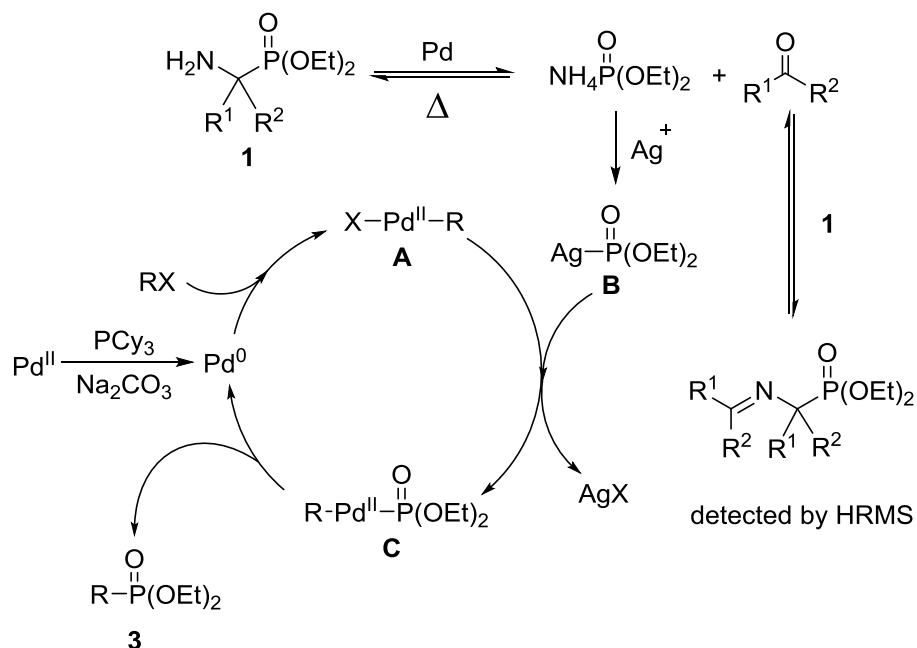

## 7. References

- (1) S. Sobhani and Z. Tashrifi, *Synth. Commun.*, 2009, **39**, 120.
- (2) H. Xu, X. Li, Y. Dong, S. Ji, J. Zuo, J. Lv and D. Yang, *Org. Lett.* 2023, **25**, 3784.
- (3) N. Shen, R. Li, C. Liu, X. Shen, W. Guan and R. Shang, *ACS Catal.* 2022, **12**, 2788.
- (4) L. Qiu, W. Hu, D. Wu, Z. Duan and F. Mathey, *Org. Lett.* 2018, **20**, 7821.
- (5) Y. Bai, N. Liu, S. Wang, S. Wang, S. Ning, L. Shi, L. Cui, Z. Zhang and J. Xiang, *Org. Lett.* 2019, **21**, 6835.
- (6) Q. Evrard, Z. Chaker, M. Roger, C. M. Sevrain, E. Delahaye, M. Gallart, P. Gilliot, C. Leuvrey, J.-M. Rueff, P. Rabu, C. Massobrio, M. Boero, A. Pautrat, P.-A. Jaffrès, G. Ori and G. Rogez, *Adv. Funct. Mater.* 2017, 1703576.
- (7) R. Zhuang, J. Xu, Z. Cai, G. Tang, M. Fang and Y. Zhao, *Org. Lett.* 2011, **13**, 2110.
- (8) C. Liu, C.-L. Ji, T. Zhou, X. Hong and M. Szostak, *Org. Lett.* 2019, **21**, 9256.
- (9) B. Huszár, R. Szolga, S. Bősze, R. O. Szabó, A. Simon, K. Karaghiosoff, M. Czugler, L. Drahos and G. Keglevich, *Chem.-Eur. J.* 2023, **29**, e202302465.
- (10) C.-Y. Lo, C.-H. Chen, T. W. T. Tsai, L. Zhang, T.-S. Lim, W. Fann, J. C. C. Chan and T.-Y. Luh, *J. Chin. Chem. Soc.* 2010, **57**, 539.
- (11) P. E. McDermott, M. P. Ó. Fearraigh, A. M. Horan, E. M. McGarrigle, *Org. Biomol. Chem.* 2023, **21**, 1027.
- (12) J. Yin, X. Lin, L. Chai, C.-Y. Wang, L. Zhu and C. Li, *Chem*, 2023, **9**, 1945.
- (13) (a) D.P. Jaisi, H. Li, A. F. Wallace, P. Paudel, M. Sun, A. Balakrishna and R. N. Lerch, *J. Agric. Food Chem.* 2016, **64**, 8474; (b) M. Doskocz, S. Roszak, D. Majumdar, J. Doskocz, R. Gancarz and J. Leszczynski, *J. Phys. Chem. A.* 2008, **112**, 2077.

## 8. Copies of NMR spectra

### $^1\text{H}$ NMR (400 MHz, $\text{CDCl}_3$ ) spectrum for 3a

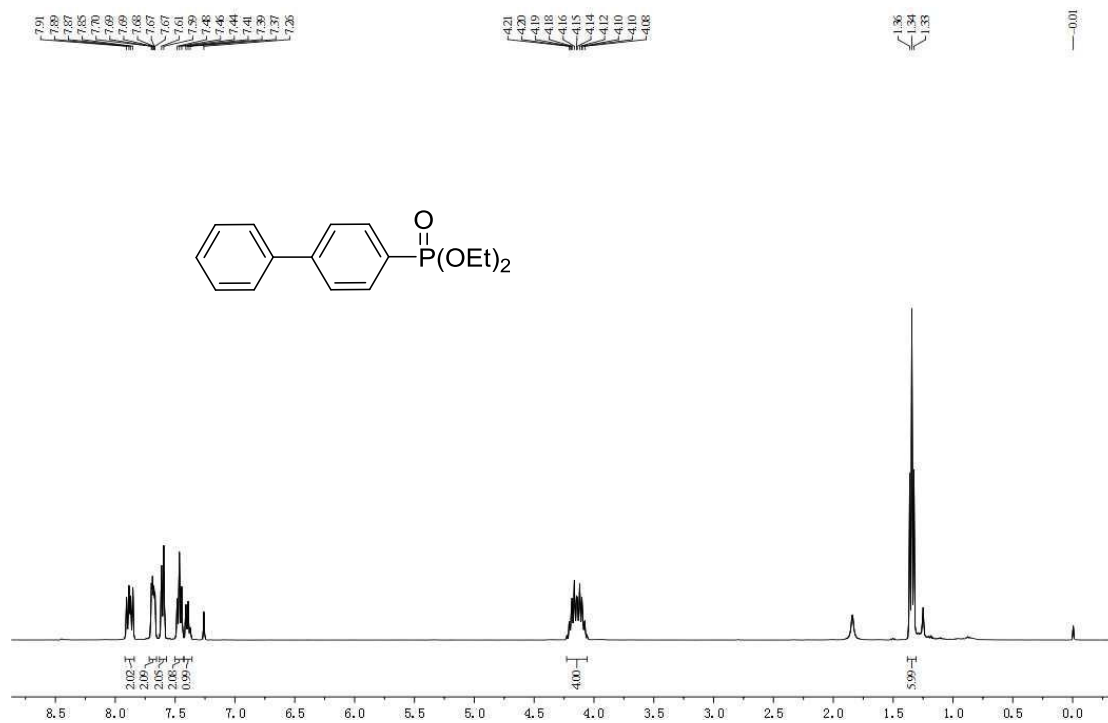

### $^{13}\text{C}$ NMR (101 MHz, $\text{CDCl}_3$ ) spectrum for 3a

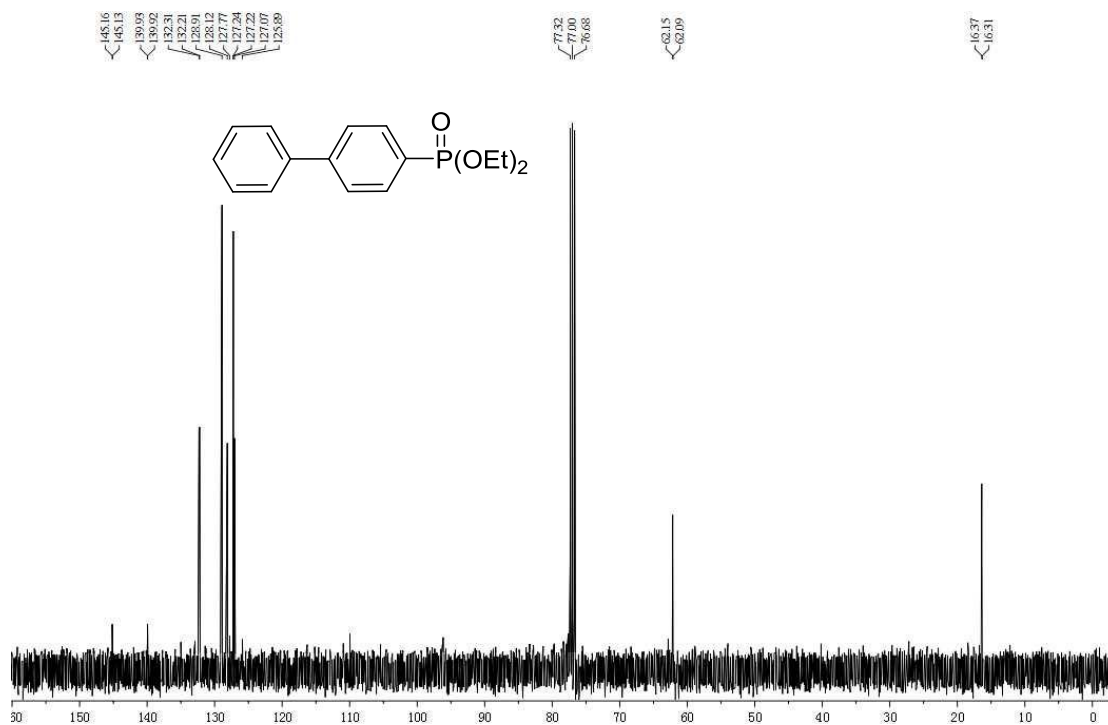

**<sup>31</sup>P NMR (162 MHz, CDCl<sub>3</sub>) spectrum for 3a**

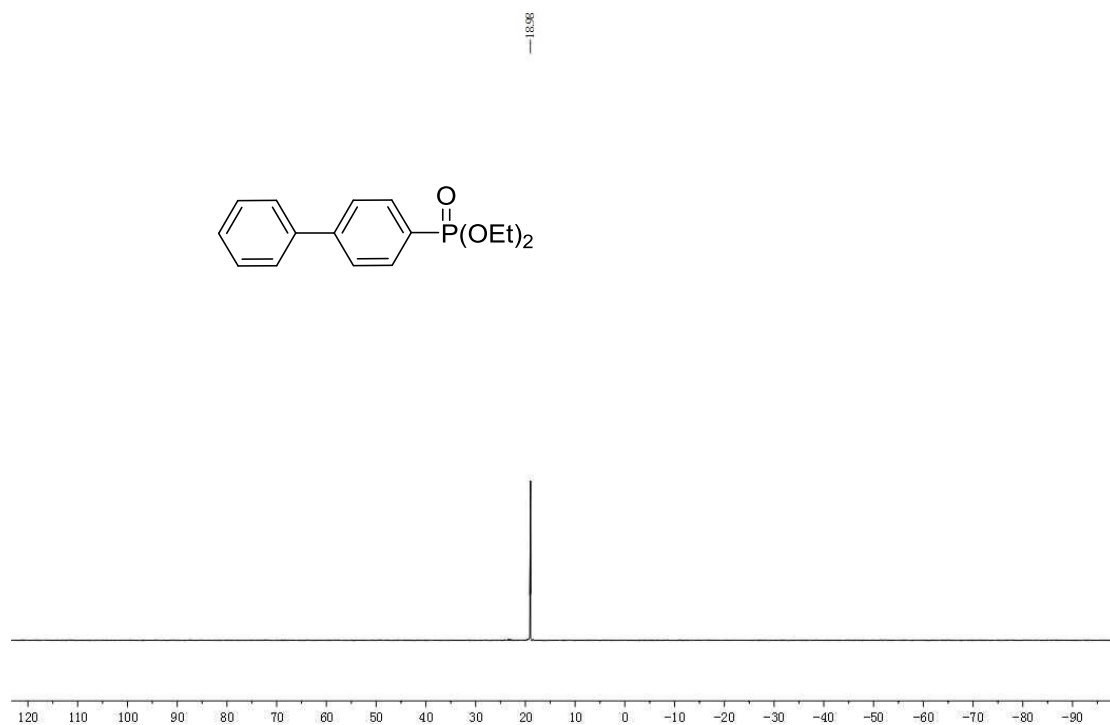

**<sup>1</sup>H NMR (600 MHz, CDCl<sub>3</sub>) spectrum for 3b**

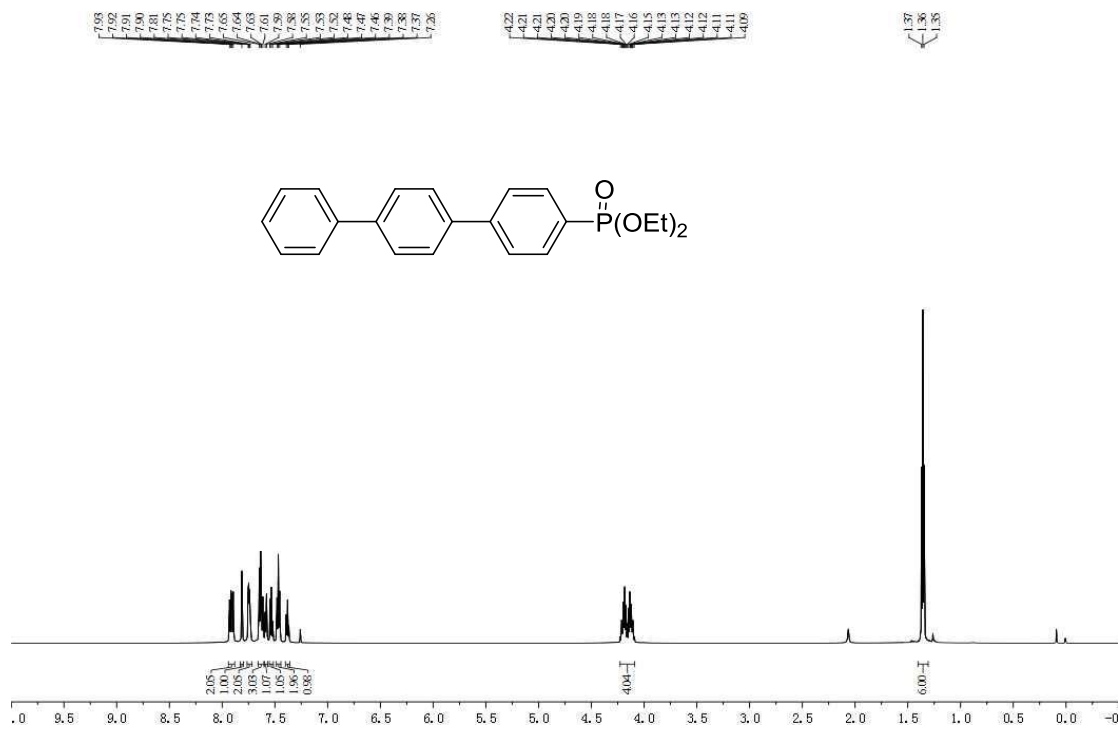

**<sup>13</sup>C NMR (151 MHz, CDCl<sub>3</sub>) spectrum for 3b**

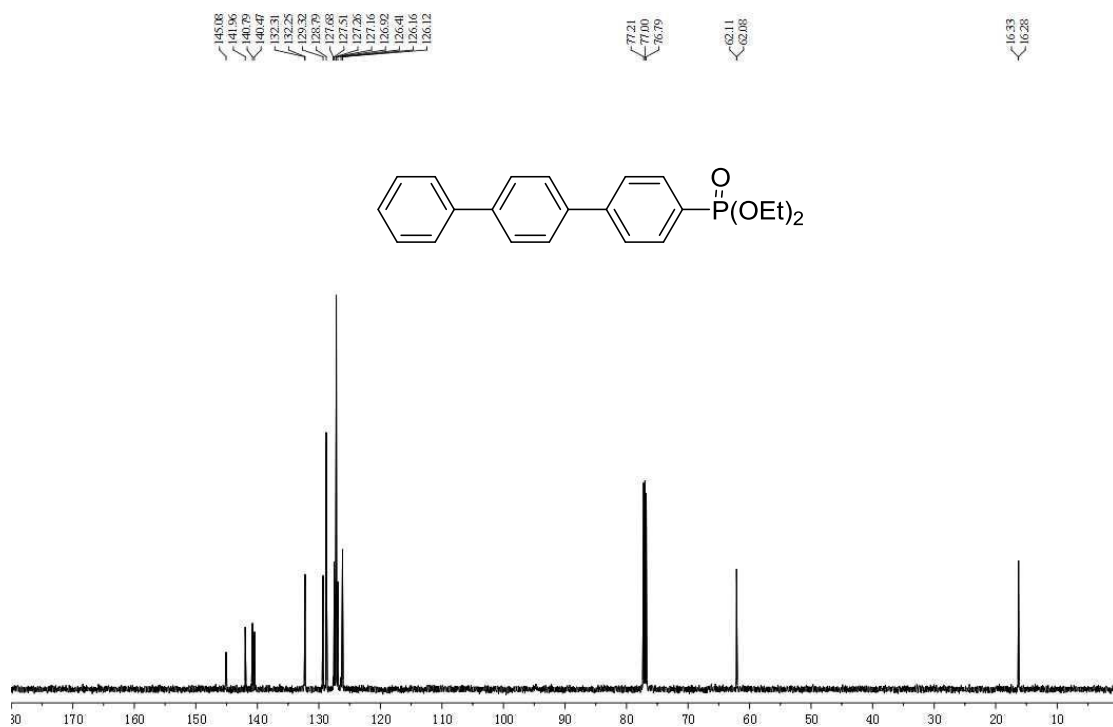

**<sup>31</sup>P NMR (243 MHz, CDCl<sub>3</sub>) spectrum for 3b**

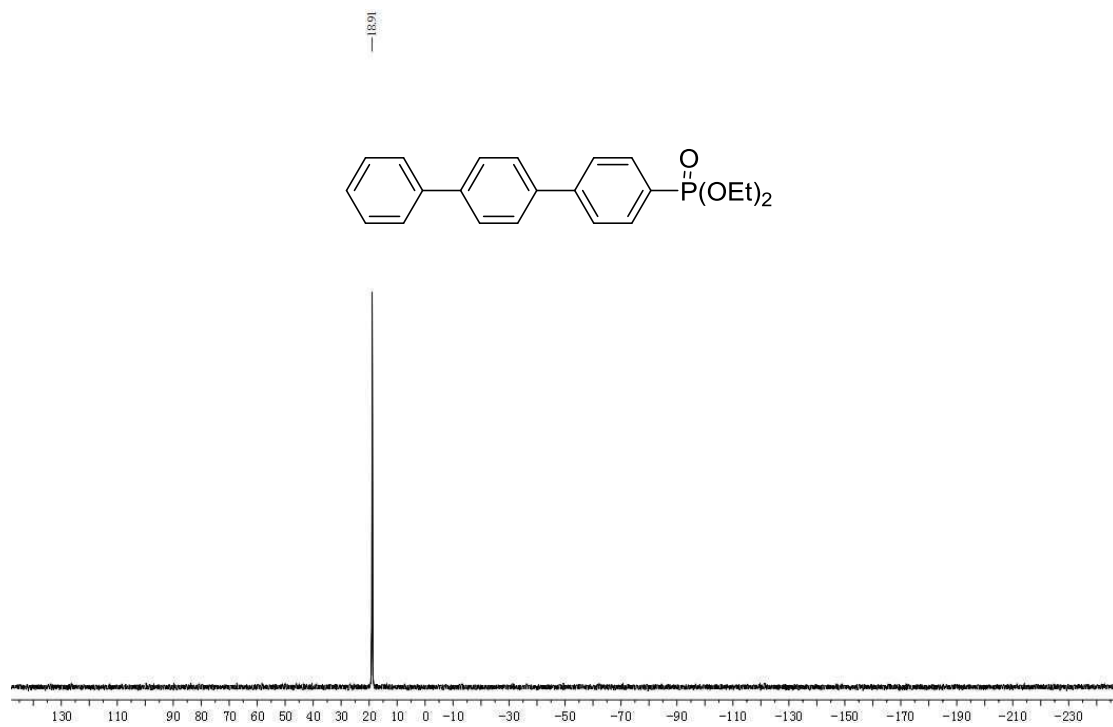

**<sup>1</sup>H NMR (600 MHz, CDCl<sub>3</sub>) spectrum for 3c**

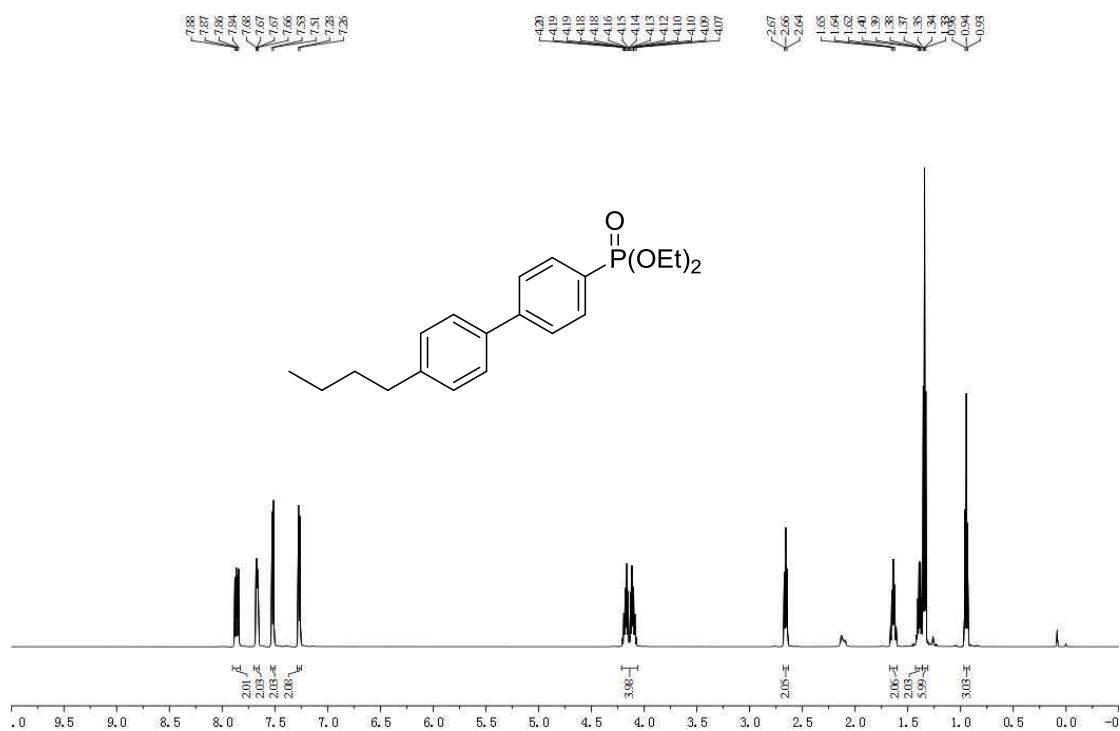

**<sup>13</sup>C NMR (151 MHz, CDCl<sub>3</sub>) spectrum for 3c**

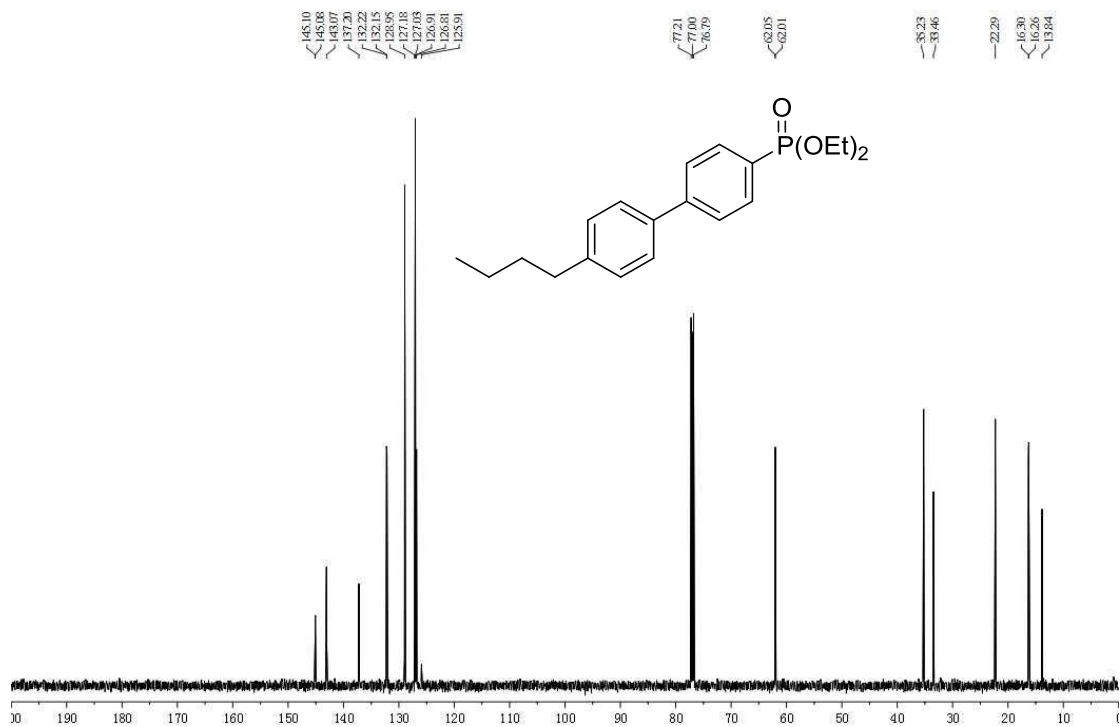

**<sup>31</sup>P NMR (243 MHz, CDCl<sub>3</sub>) spectrum for 3c**

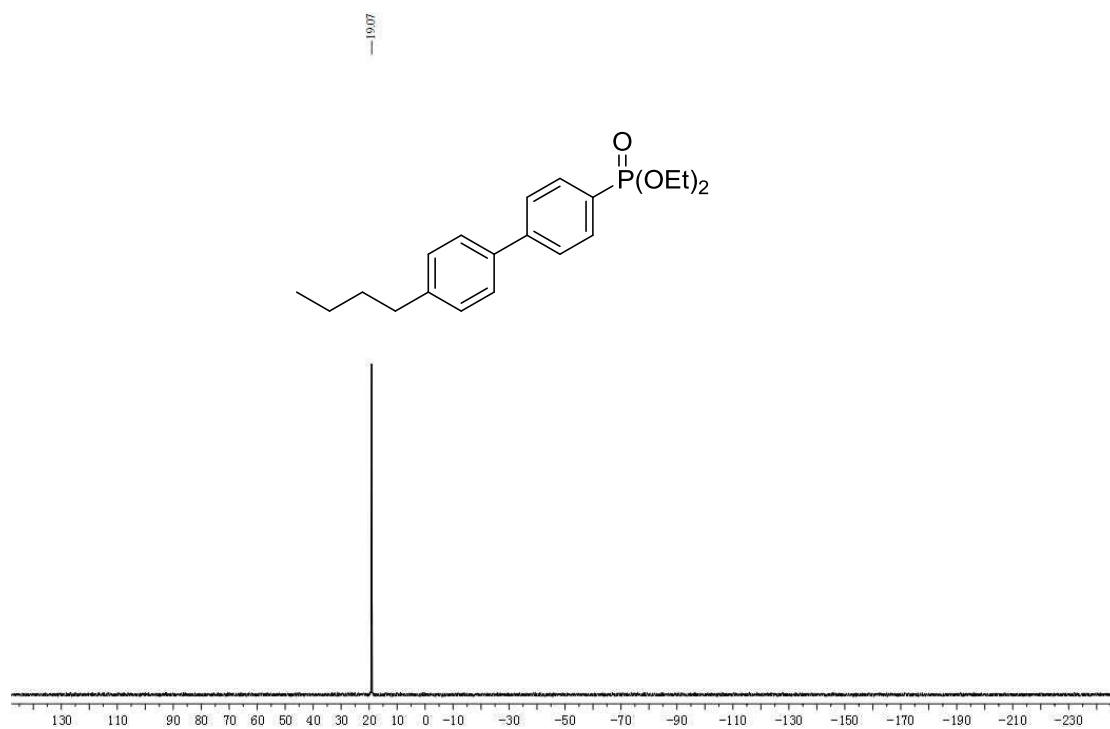

**<sup>1</sup>H NMR (600 MHz, CDCl<sub>3</sub>) spectrum for 3d**

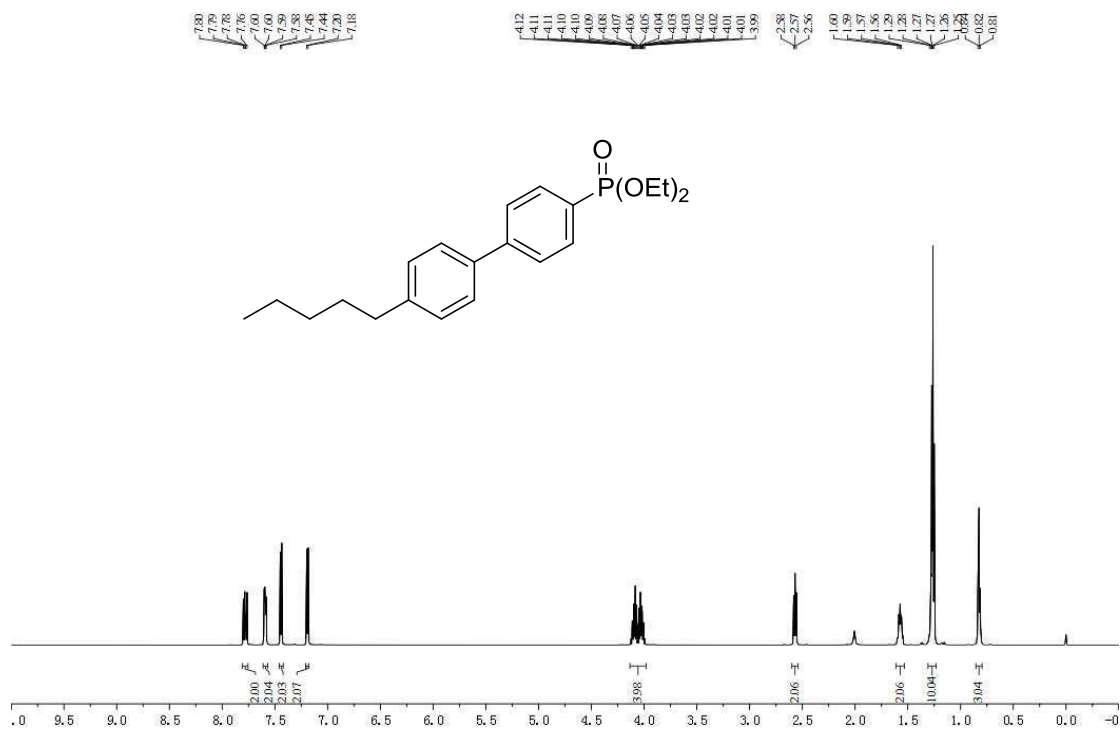

**<sup>13</sup>C NMR (151 MHz, CDCl<sub>3</sub>) spectrum for 3d**

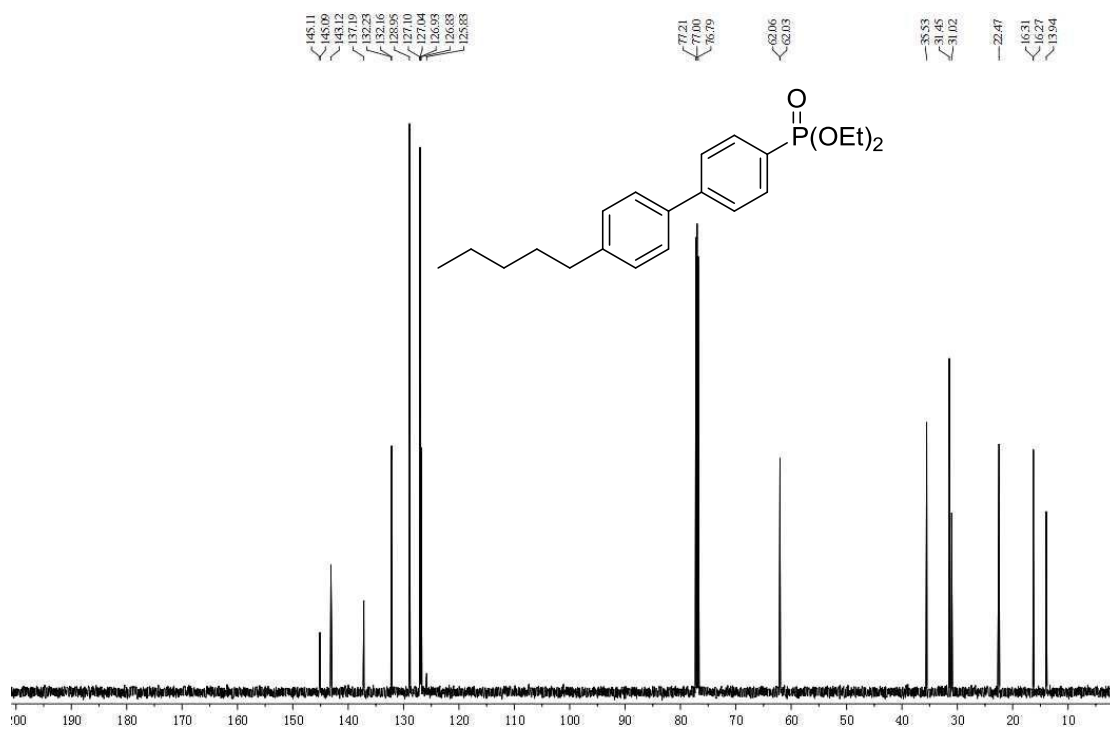

**<sup>31</sup>P NMR (243 MHz, CDCl<sub>3</sub>) spectrum for 3d**

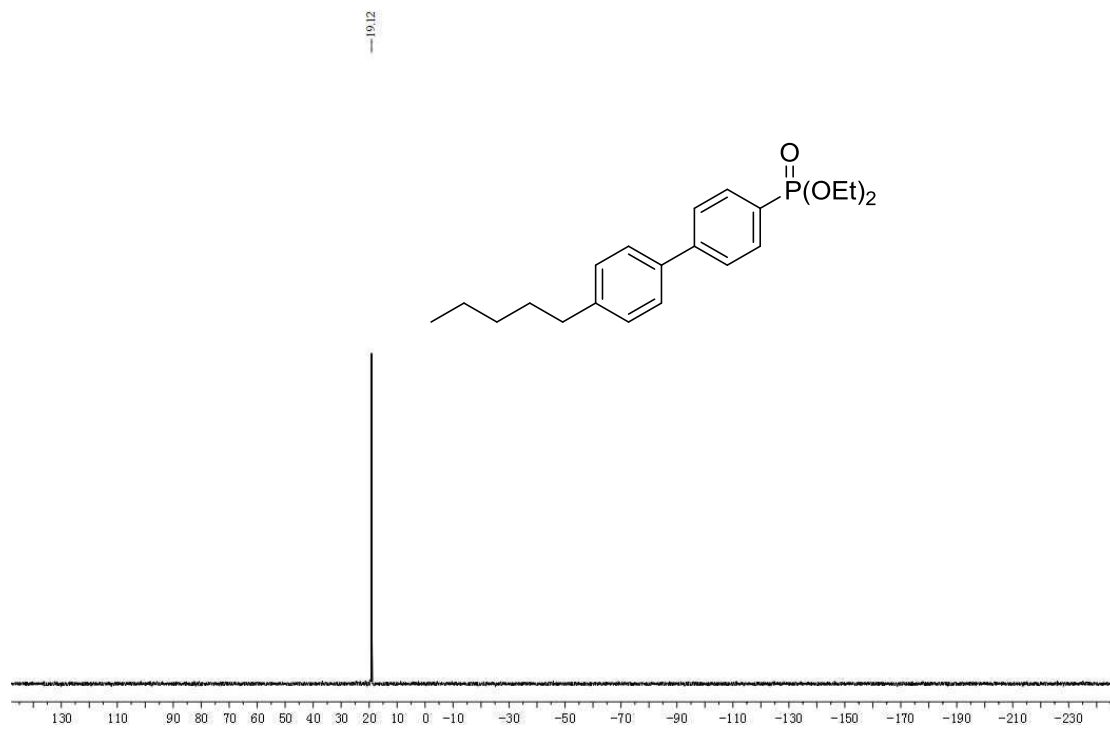

**<sup>1</sup>H NMR (400 MHz, CDCl<sub>3</sub>) spectrum for 3e**

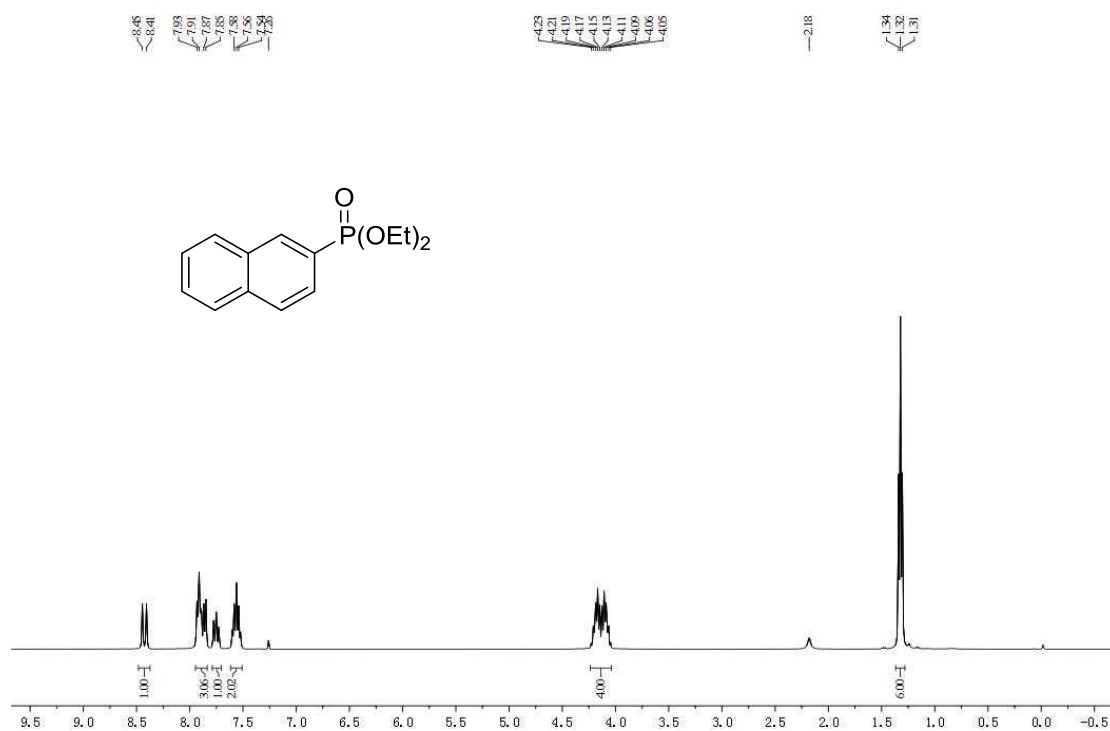

**<sup>13</sup>C NMR (101 MHz, CDCl<sub>3</sub>) spectrum for 3e**

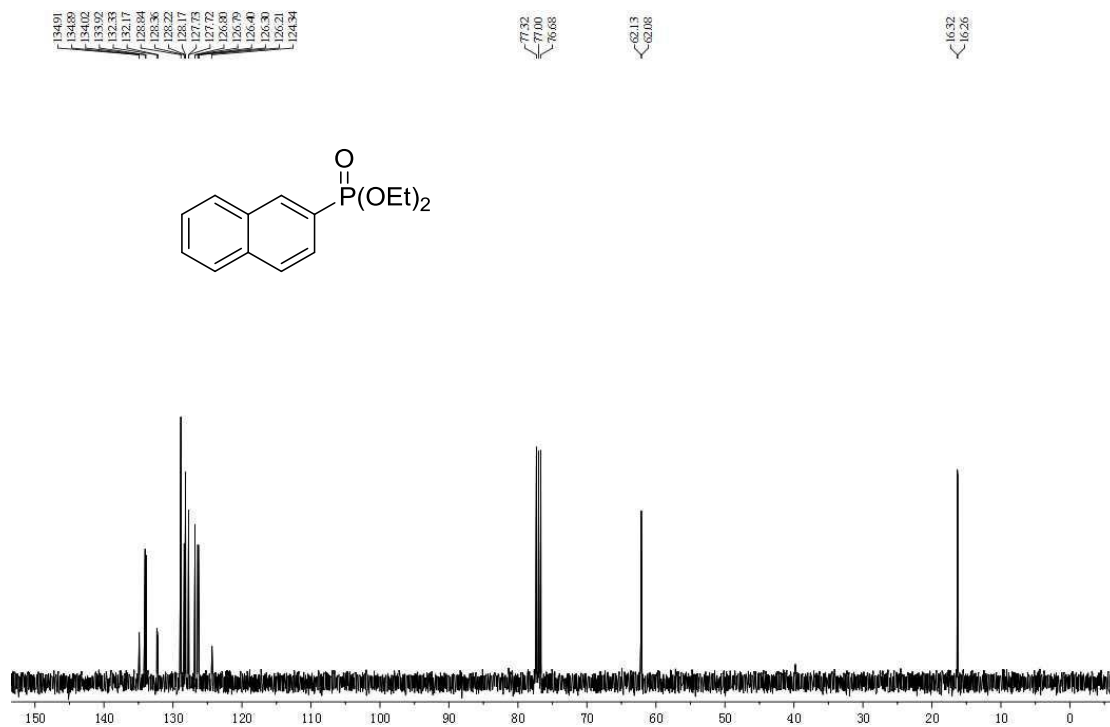



**$^{31}\text{P}$  NMR (162 MHz,  $\text{CDCl}_3$ ) spectrum for 3e**

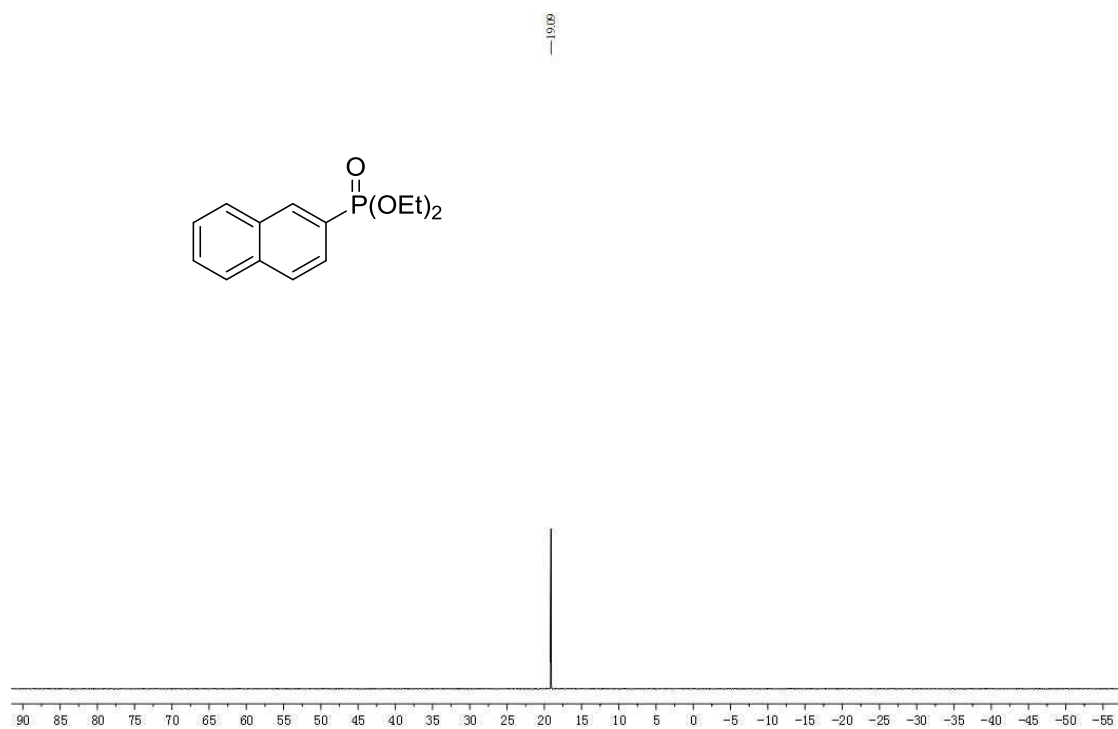

**$^1\text{H}$  NMR (600 MHz,  $\text{CDCl}_3$ ) spectrum for 3f**

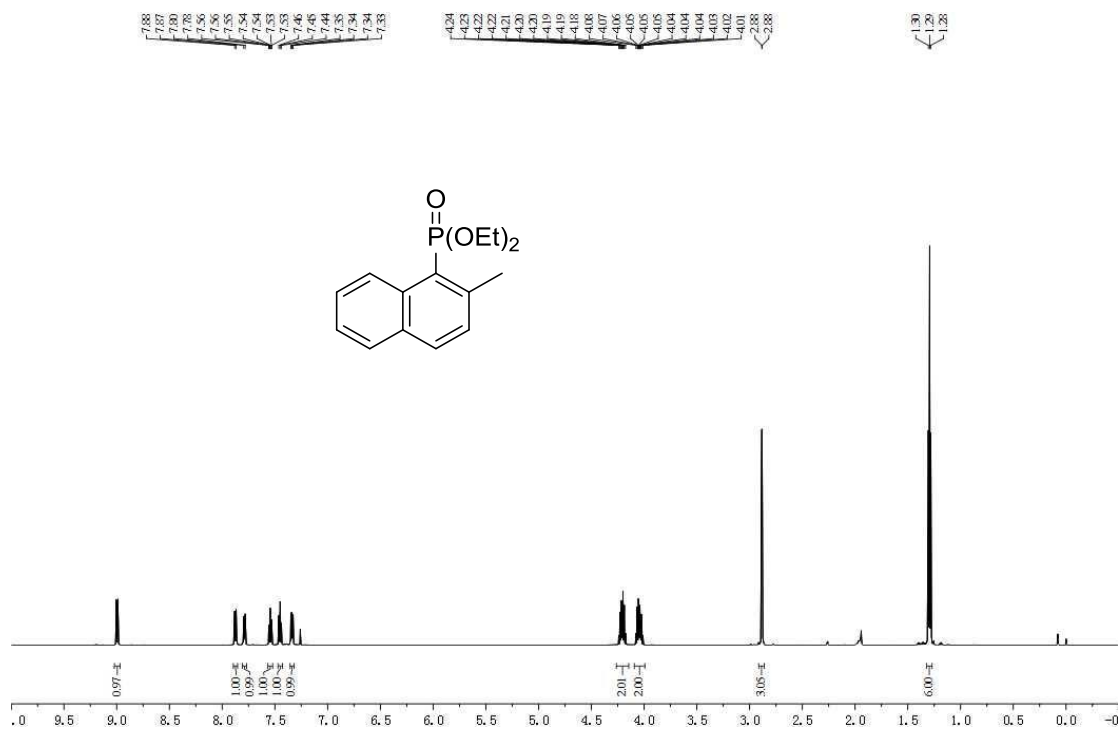

**<sup>13</sup>C NMR (151 MHz, CDCl<sub>3</sub>) spectrum for 3f**

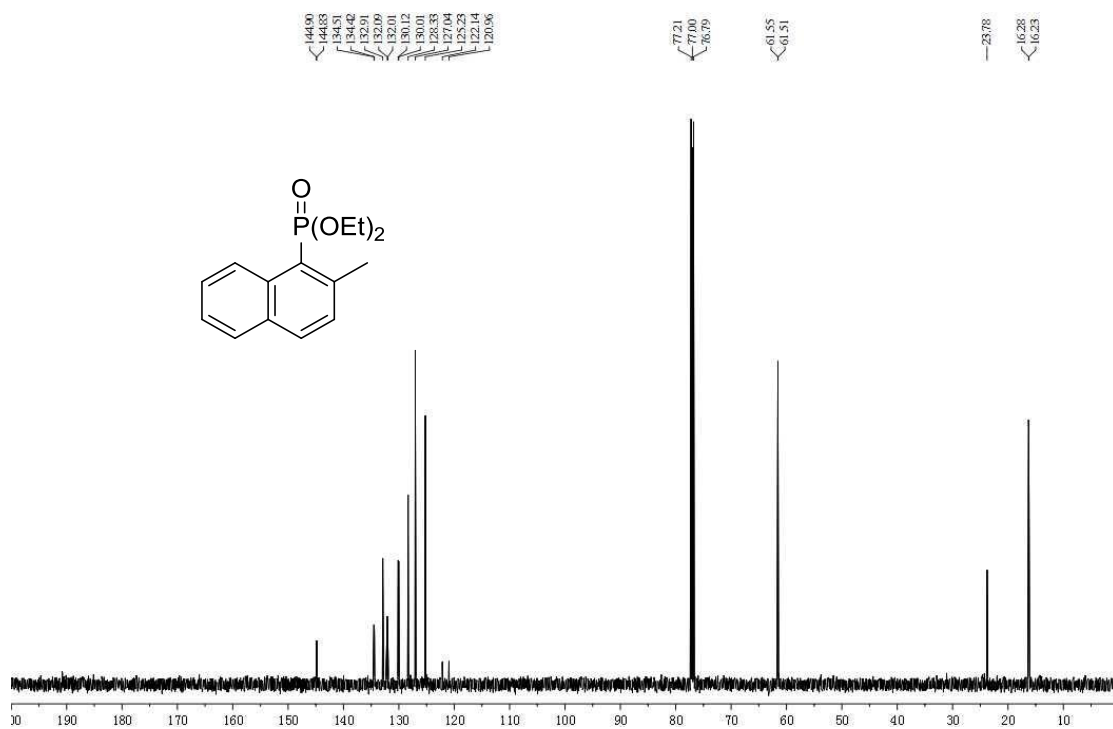

**<sup>31</sup>P NMR (243 MHz, CDCl<sub>3</sub>) spectrum for 3f**

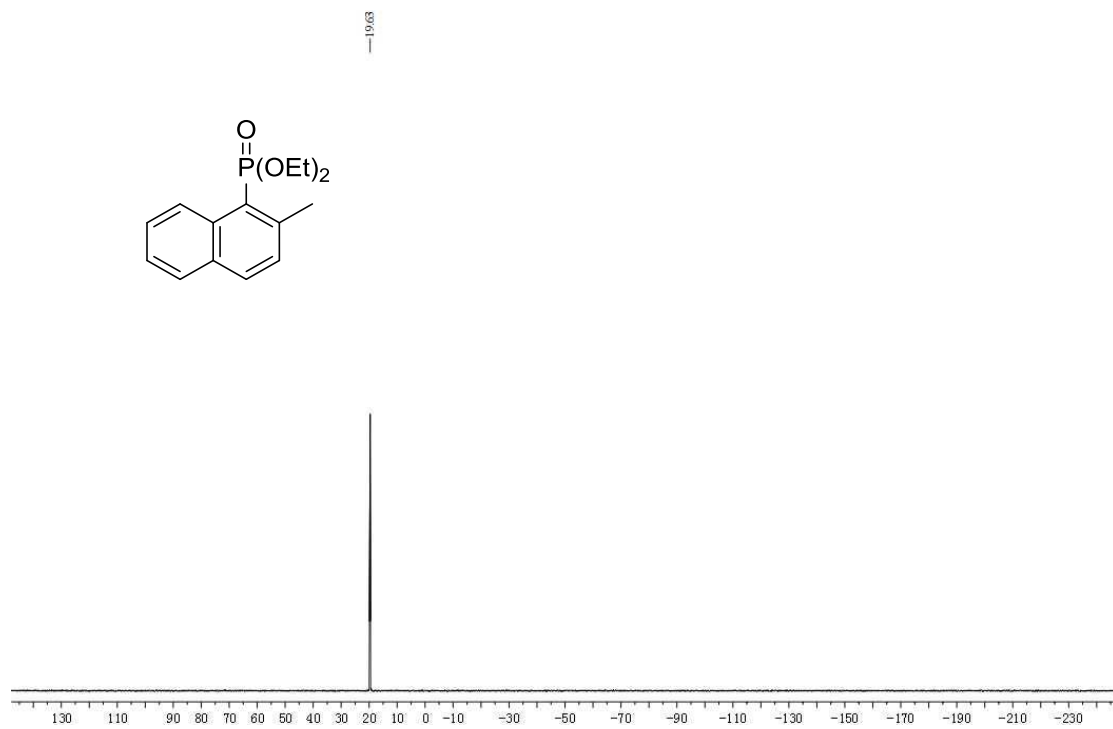

**<sup>1</sup>H NMR (400 MHz, CDCl<sub>3</sub>) spectrum for 3g**

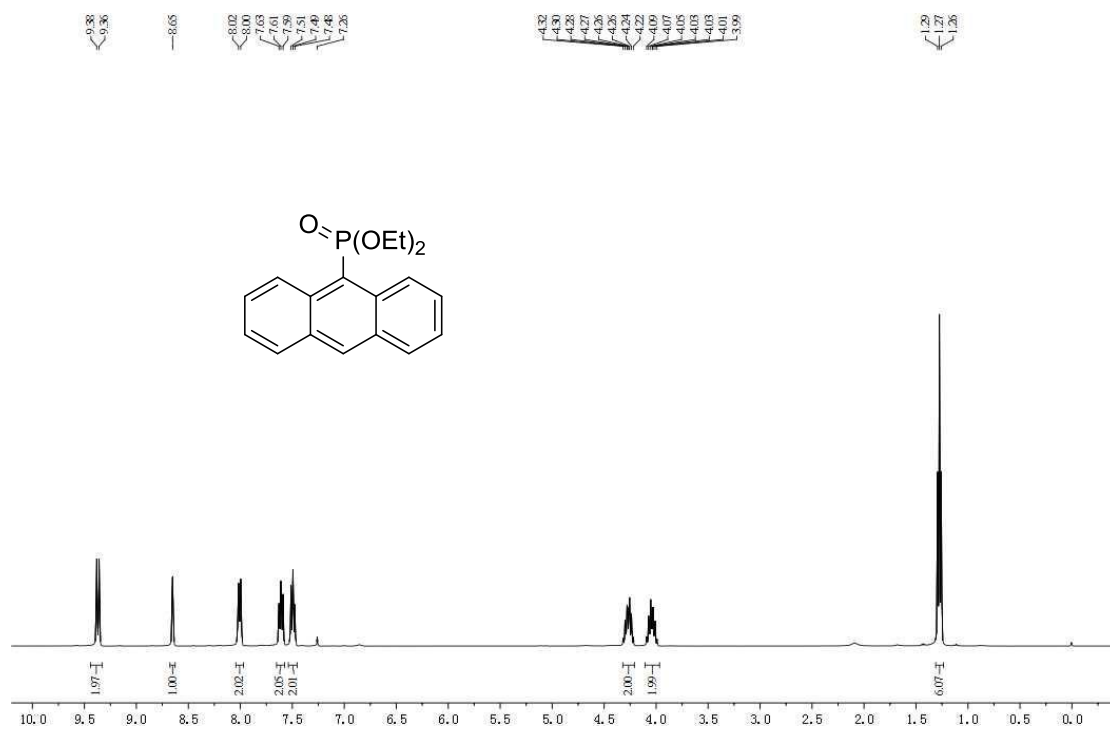

**<sup>13</sup>C NMR (101 MHz, CDCl<sub>3</sub>) spectrum for 3g**

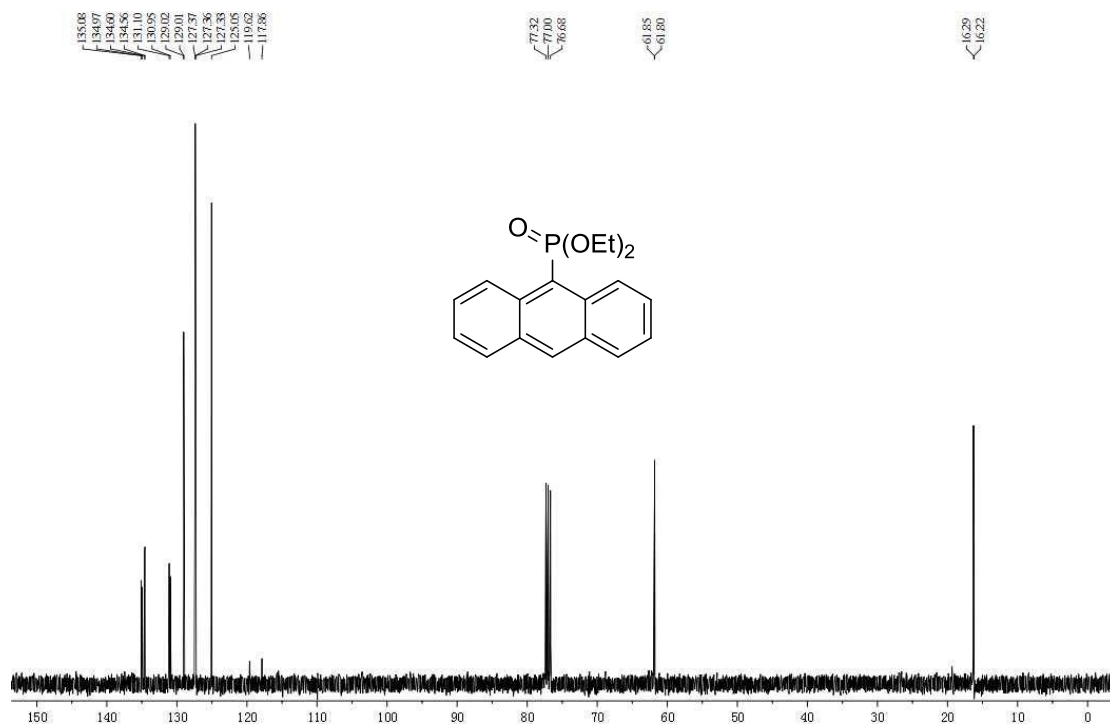

<sup>31</sup>P NMR (162 MHz, CDCl<sub>3</sub>) spectrum for 3g

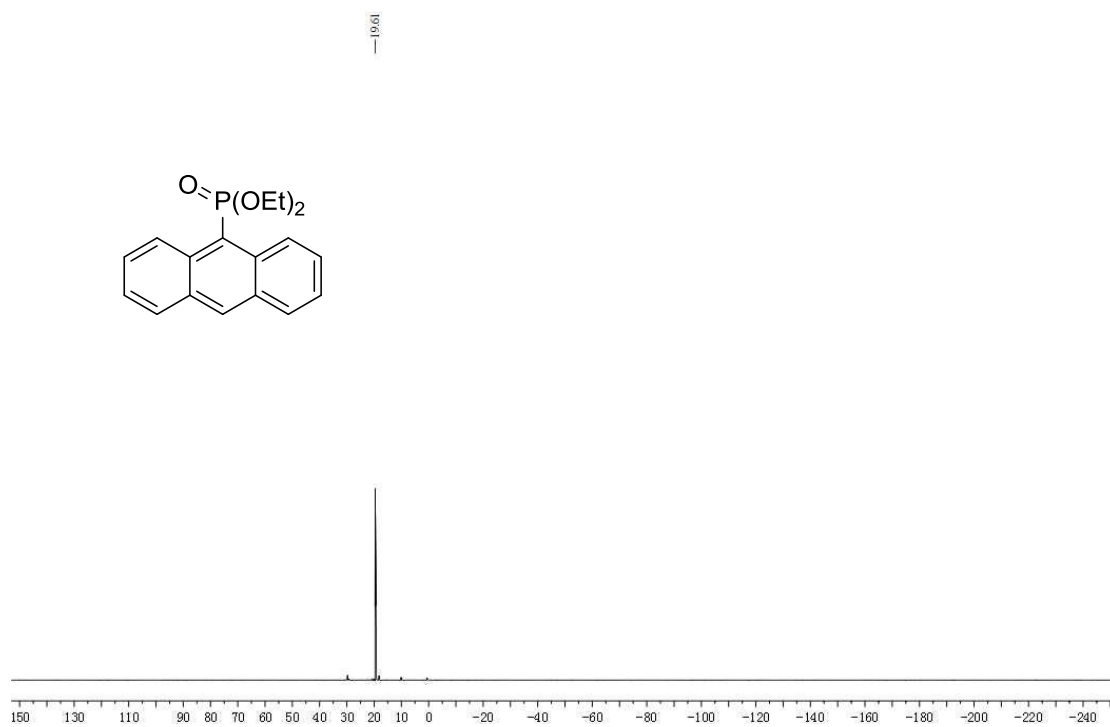

<sup>1</sup>H NMR (400 MHz, CDCl<sub>3</sub>) spectrum for 3h

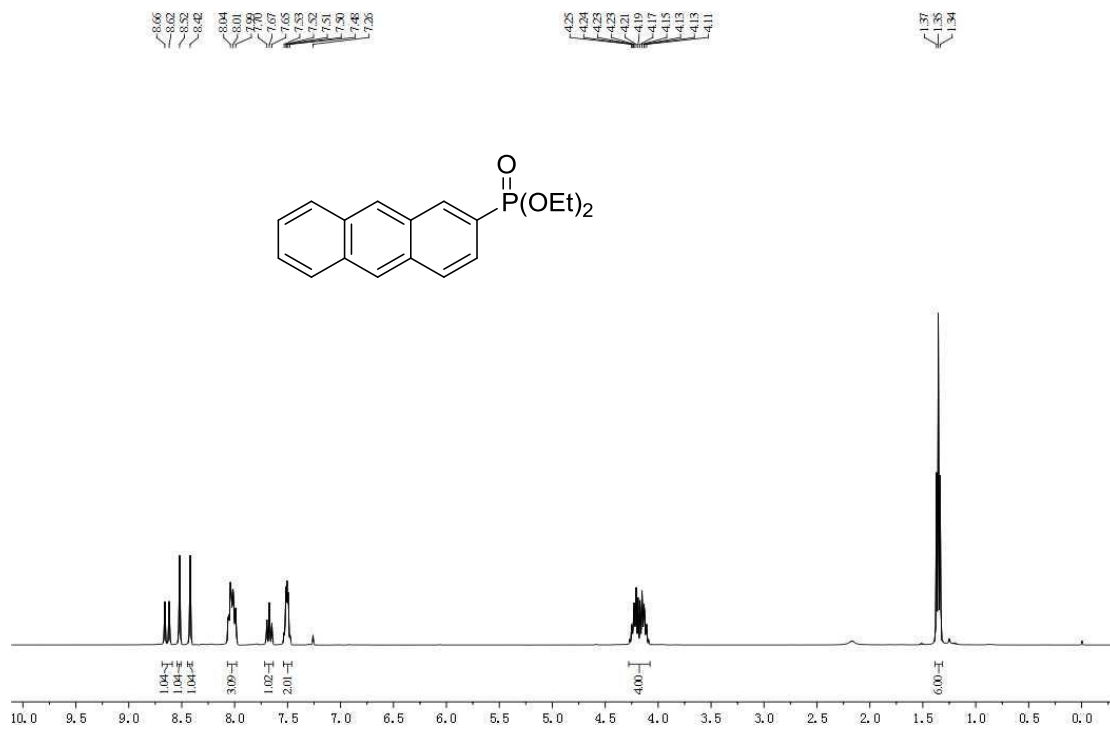

**<sup>13</sup>C NMR (101 MHz, CDCl<sub>3</sub>) spectrum for 3h**

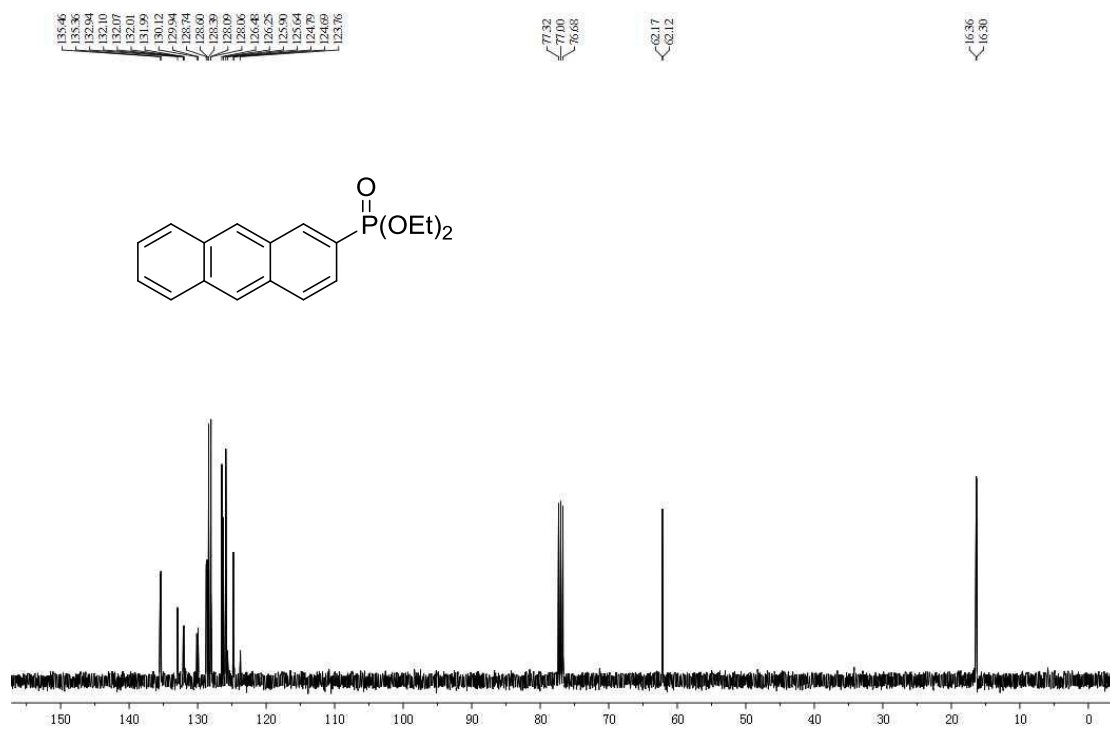

**<sup>31</sup>P NMR (162 MHz, CDCl<sub>3</sub>) spectrum for 3h**

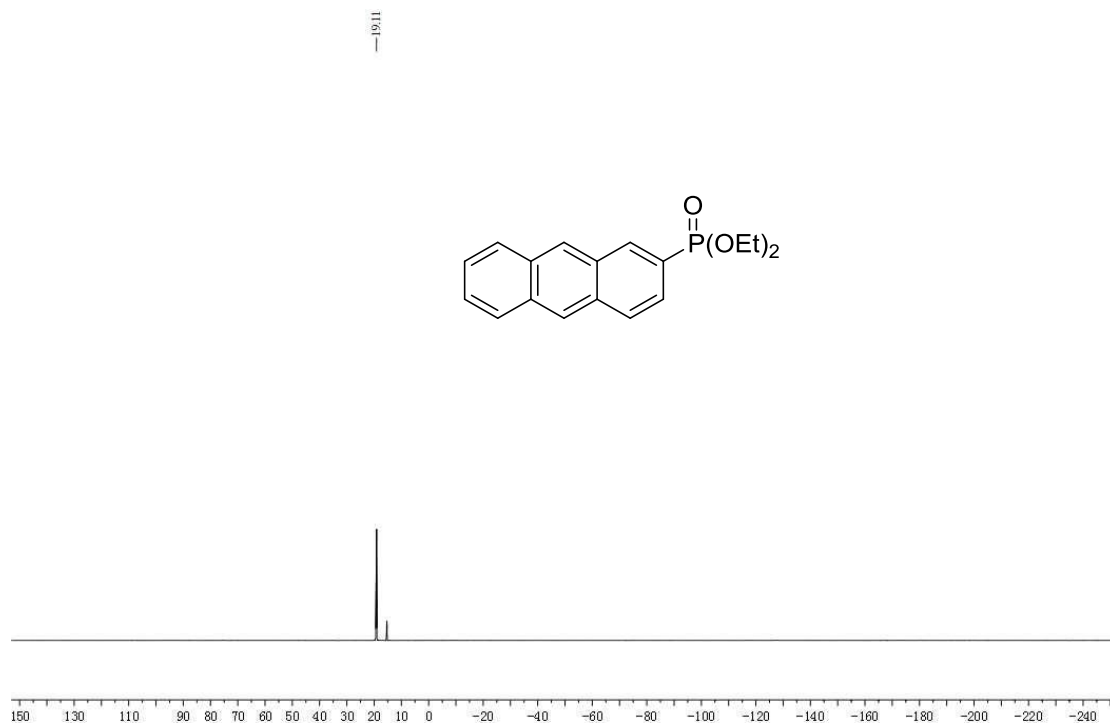

**<sup>1</sup>H NMR (400 MHz, CDCl<sub>3</sub>) spectrum for 3i**

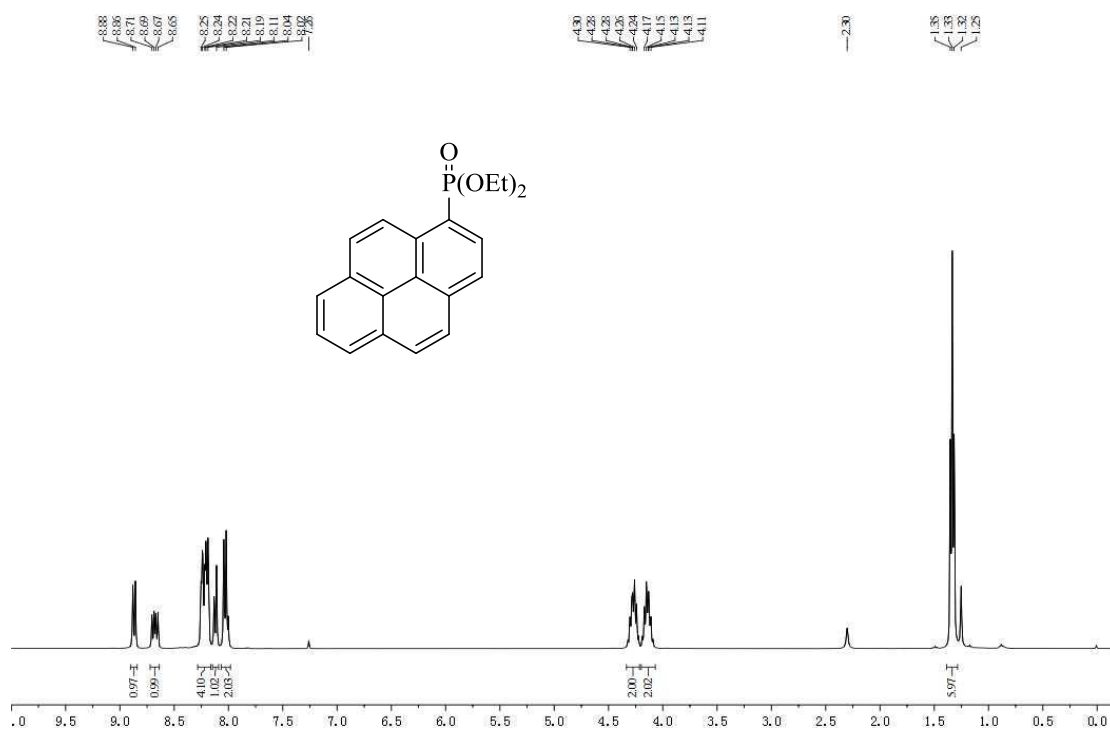

**<sup>13</sup>C NMR (101 MHz, CDCl<sub>3</sub>) spectrum for 3i**

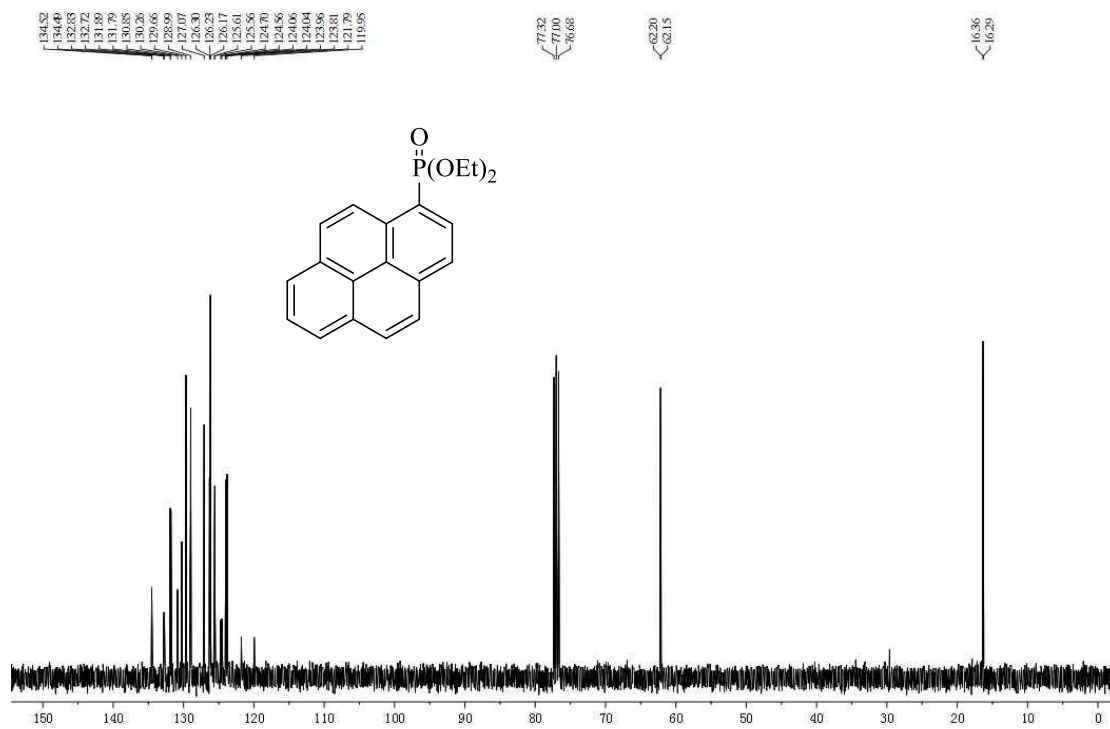

**<sup>31</sup>P NMR (162 MHz, CDCl<sub>3</sub>) spectrum for 3i**

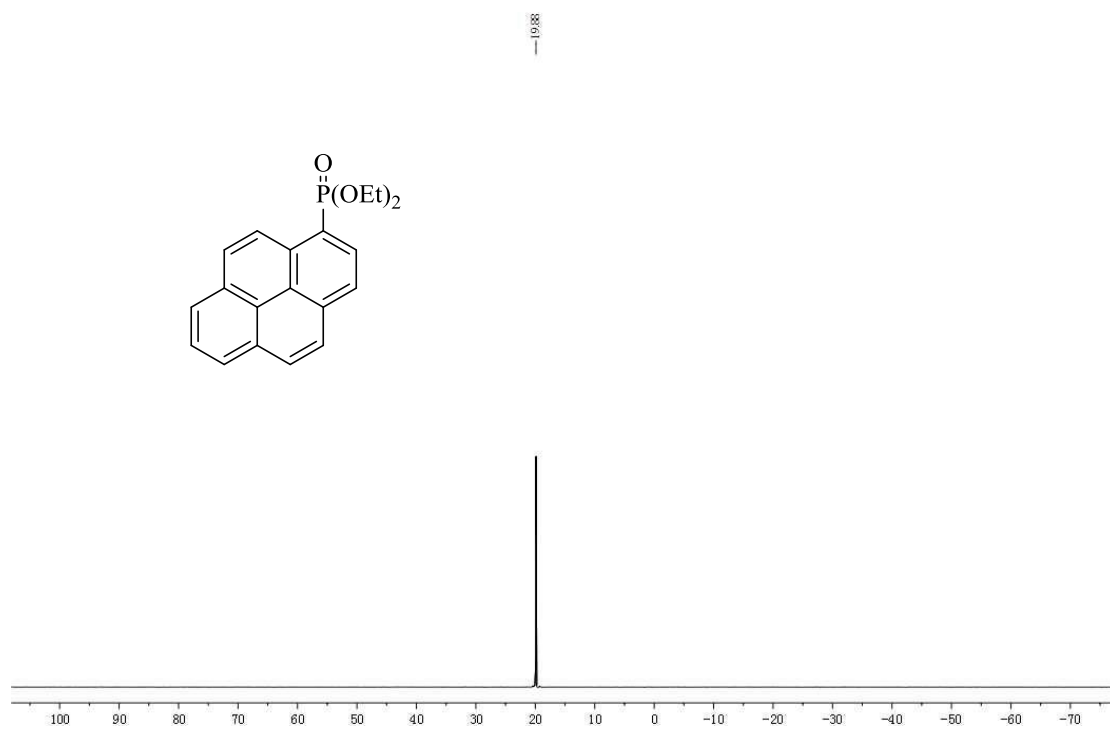

**<sup>1</sup>H NMR (400 MHz, CDCl<sub>3</sub>) spectrum for 3j**

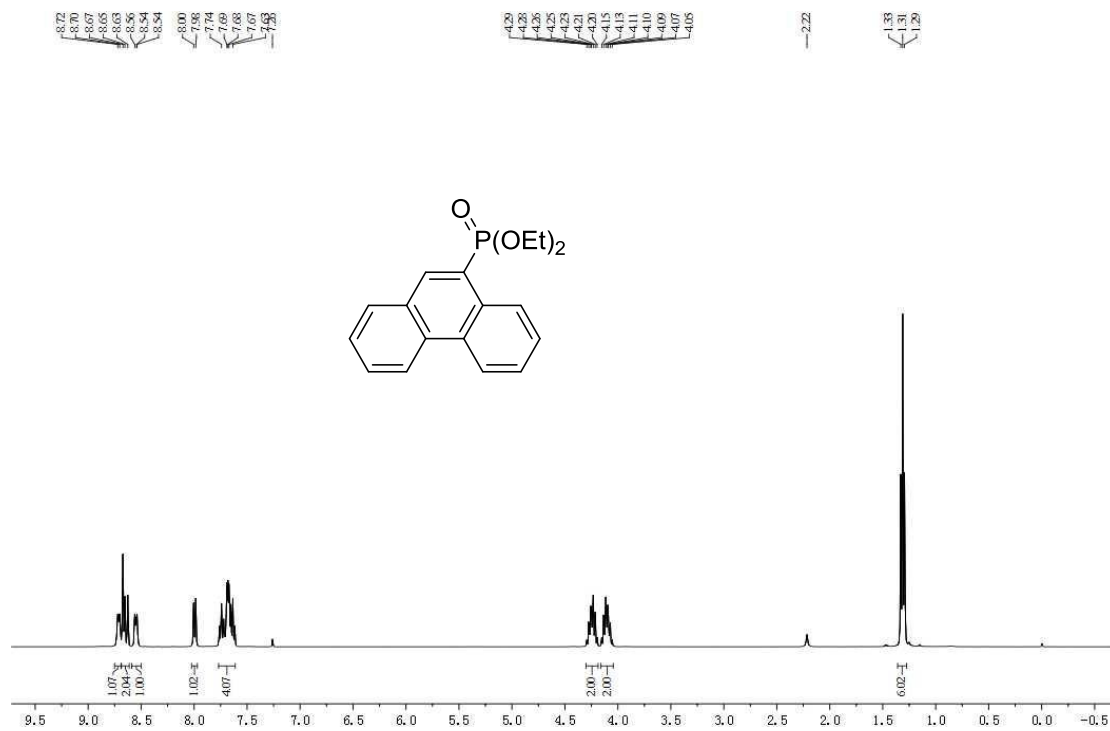

**<sup>13</sup>C NMR (101 MHz, CDCl<sub>3</sub>) spectrum for 3j**

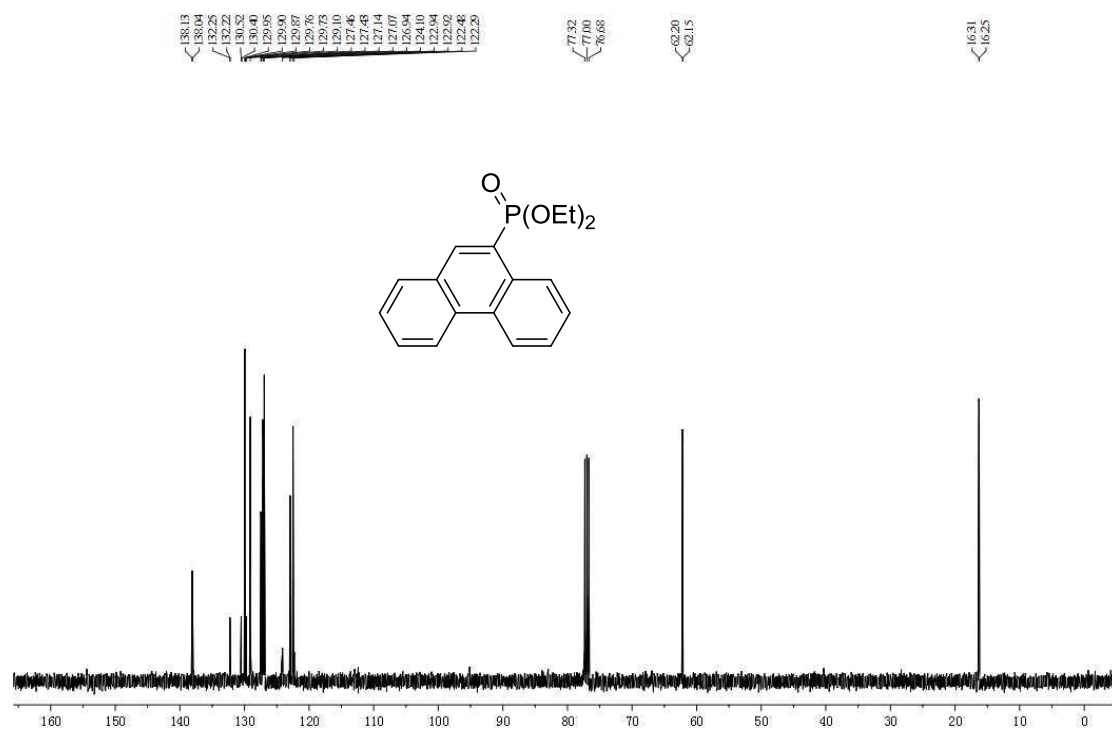

**<sup>31</sup>P NMR (162 MHz, CDCl<sub>3</sub>) spectrum for 3j**

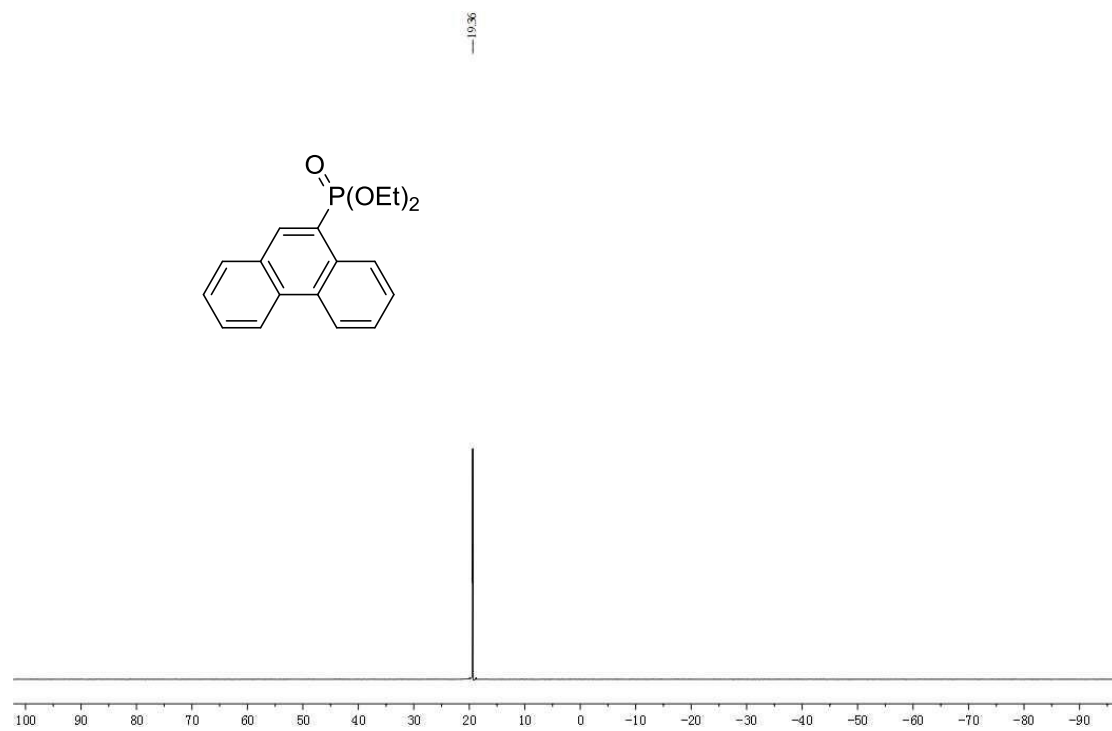



**$^1\text{H}$  NMR (600 MHz,  $\text{CDCl}_3$ ) spectrum for 3k**

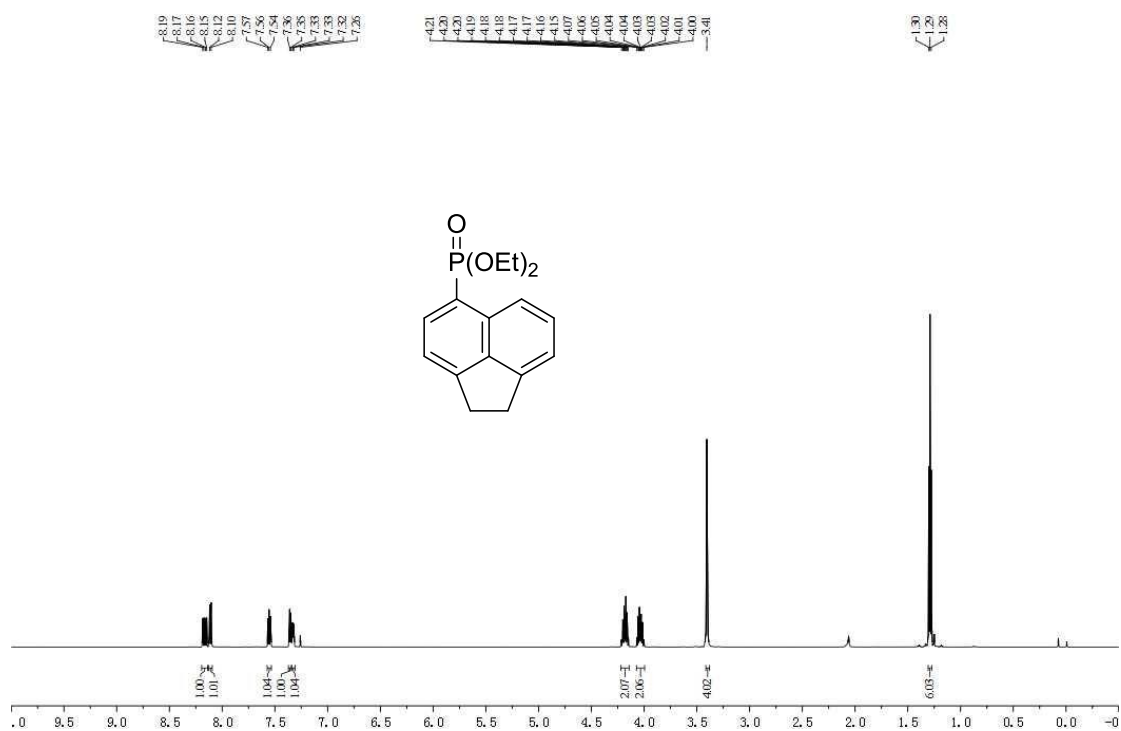

**$^{13}\text{C}$  NMR (151 MHz,  $\text{CDCl}_3$ ) spectrum for 3k**

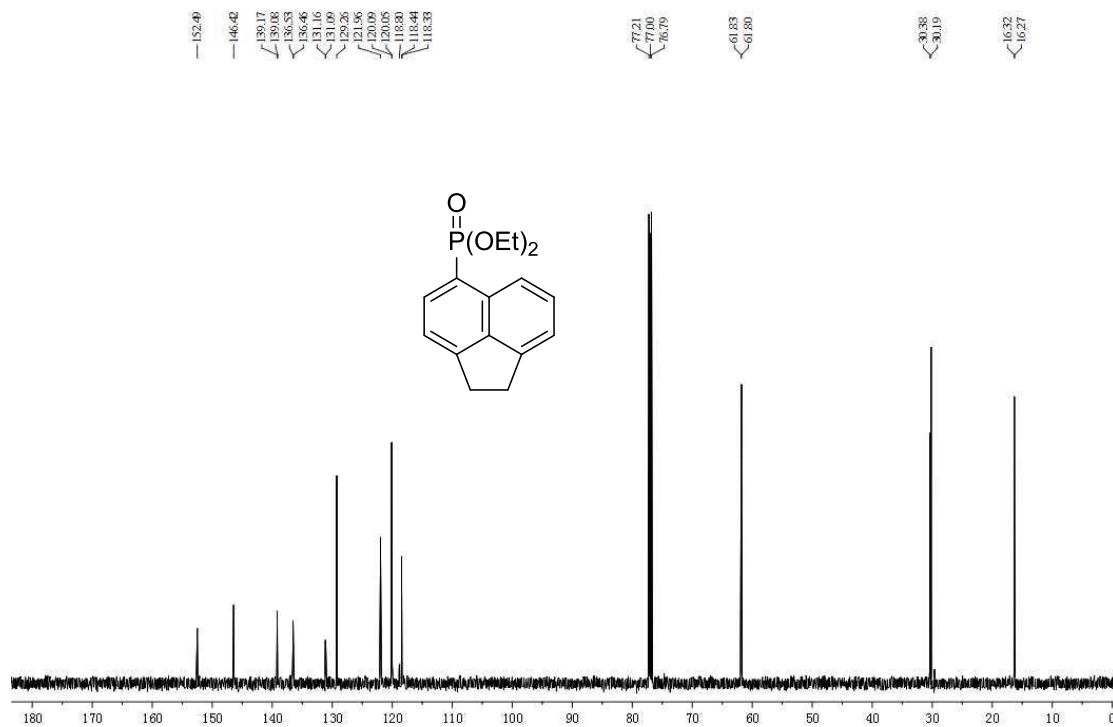

<sup>31</sup>P NMR (243 MHz, CDCl<sub>3</sub>) spectrum for 3k

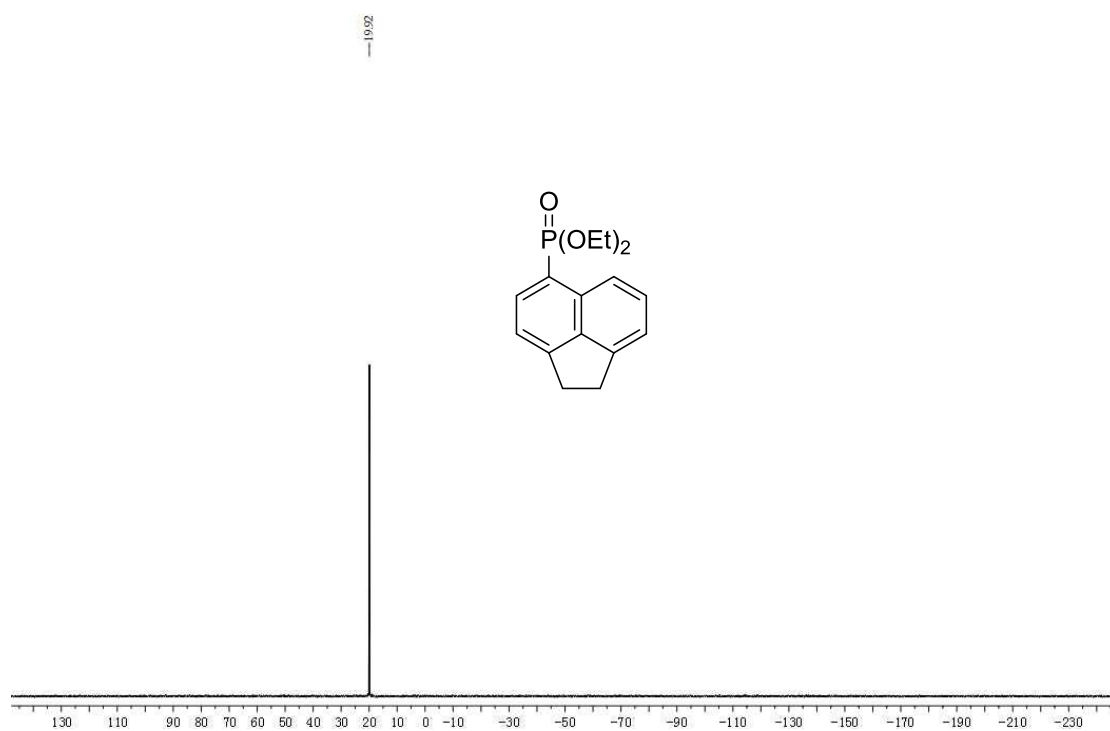

<sup>1</sup>H NMR (600 MHz, CDCl<sub>3</sub>) spectrum for 3l

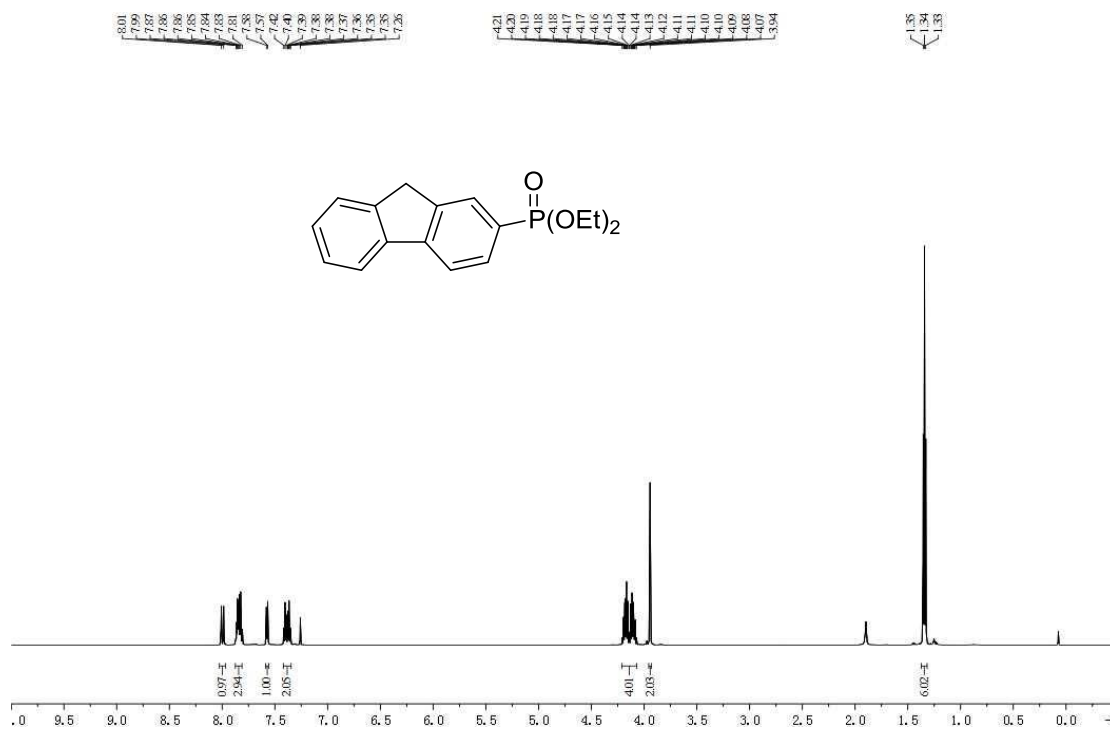

**<sup>13</sup>C NMR (151 MHz, CDCl<sub>3</sub>) spectrum for 3l**

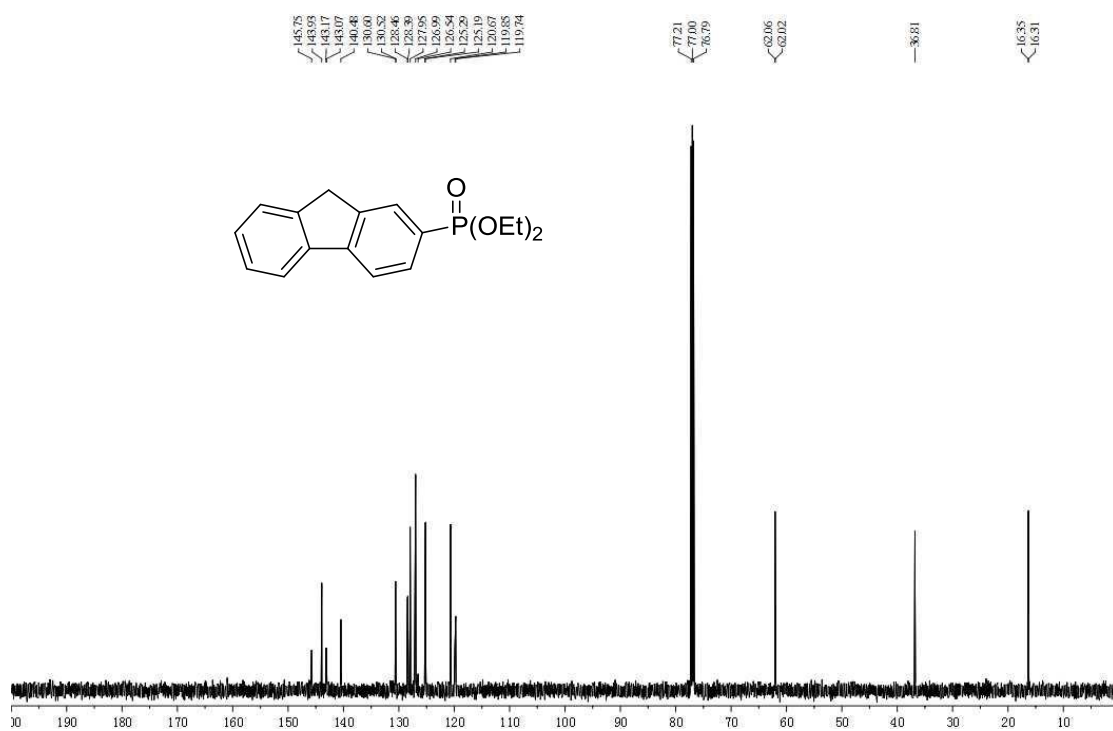

**<sup>31</sup>P NMR (243 MHz, CDCl<sub>3</sub>) spectrum for 3l**

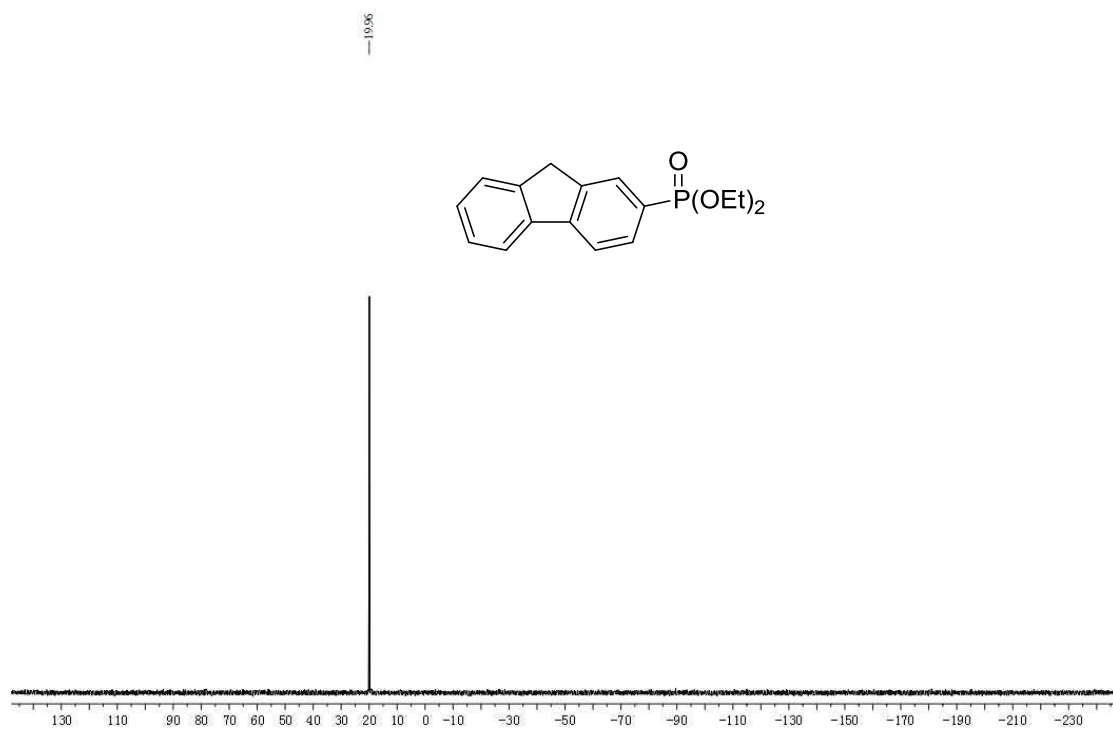

**<sup>1</sup>H NMR (400 MHz, CDCl<sub>3</sub>) spectrum for 3m**

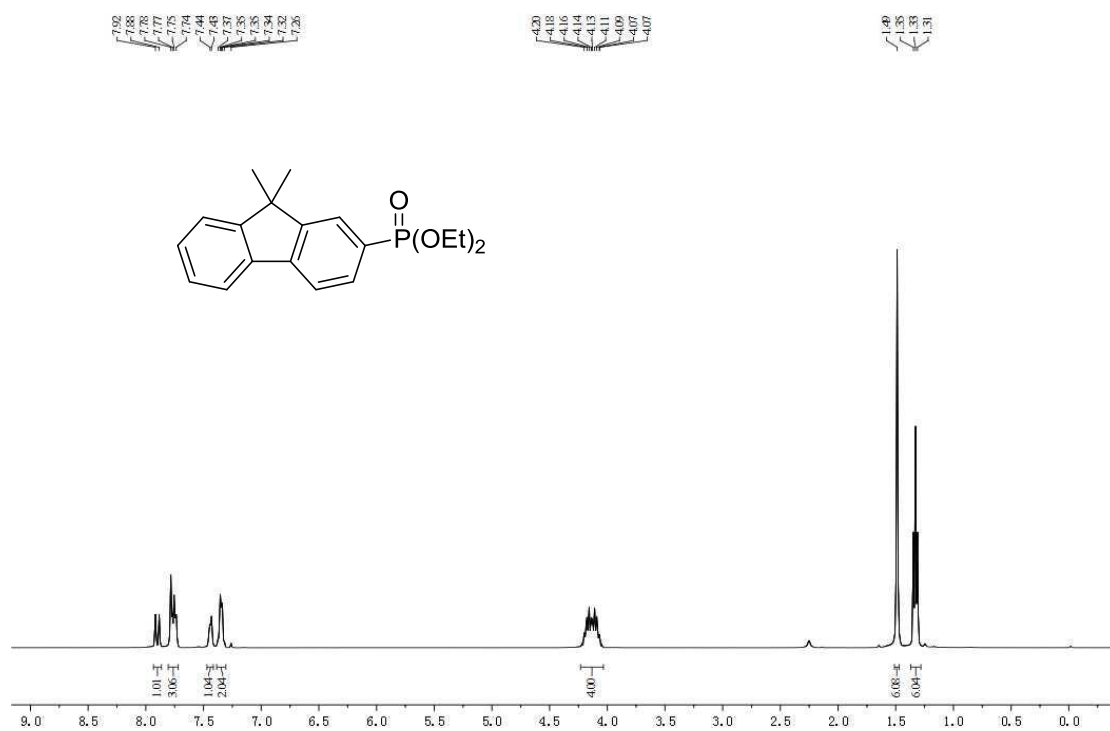

**<sup>13</sup>C NMR (101 MHz, CDCl<sub>3</sub>) spectrum for 3m**

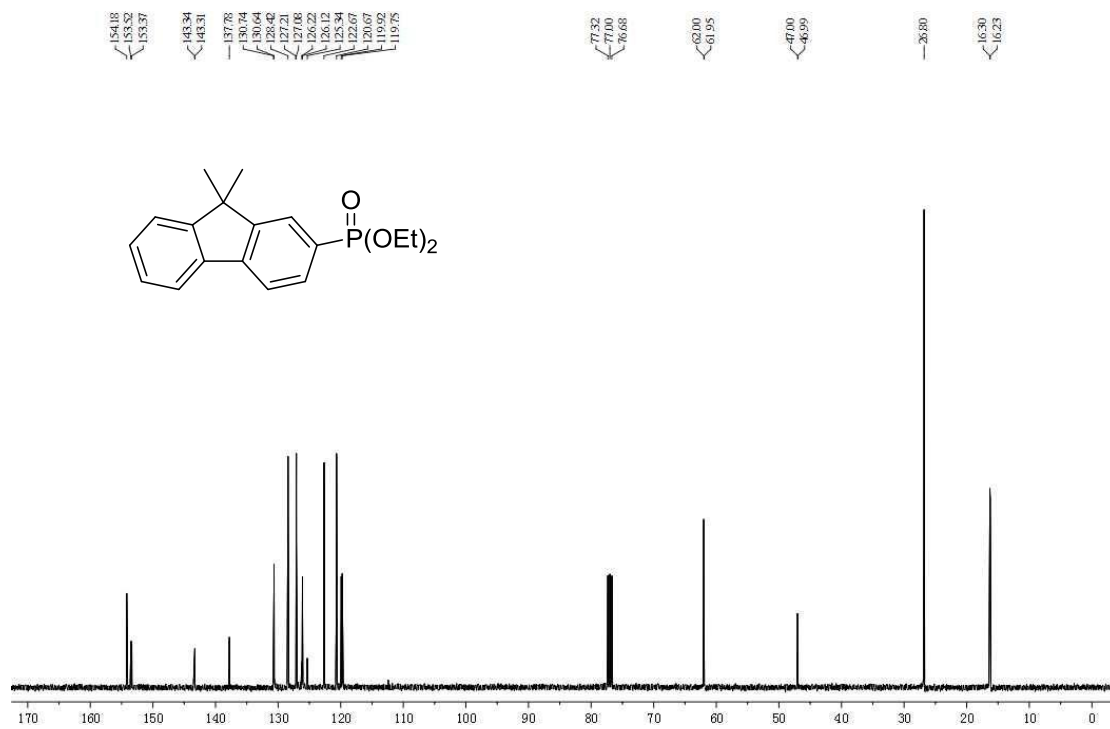

**$^{31}\text{P}$  NMR (162 MHz,  $\text{CDCl}_3$ ) spectrum for 3m**

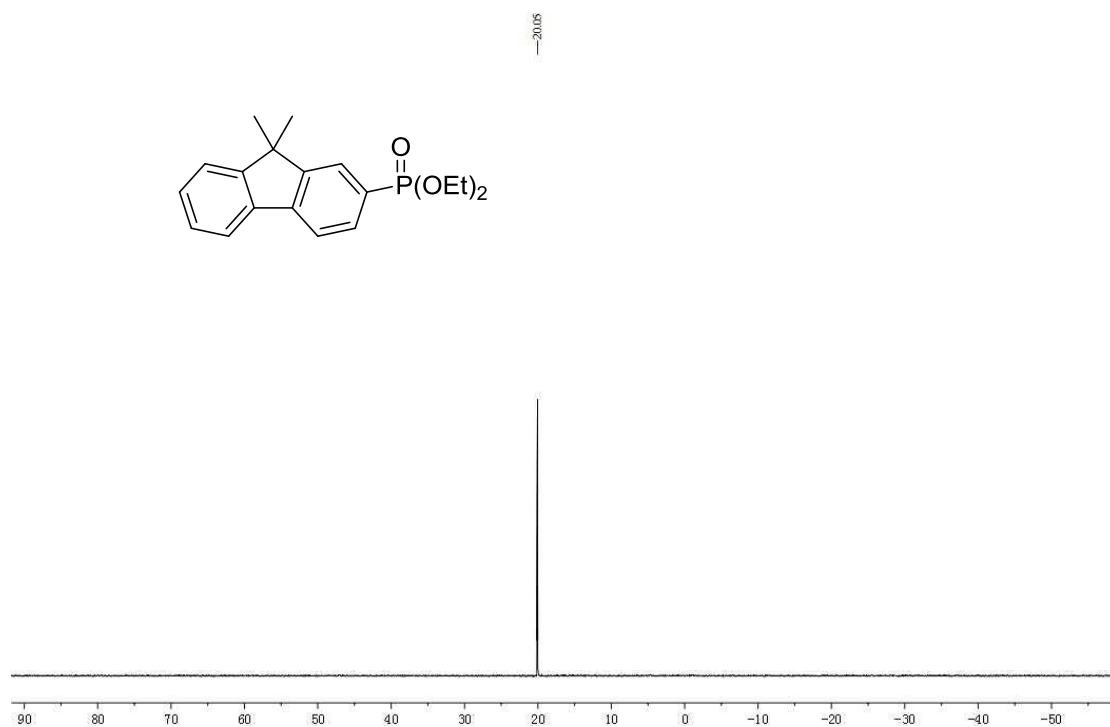

**$^1\text{H}$  NMR (400 MHz,  $\text{CDCl}_3$ ) spectrum for 3n**

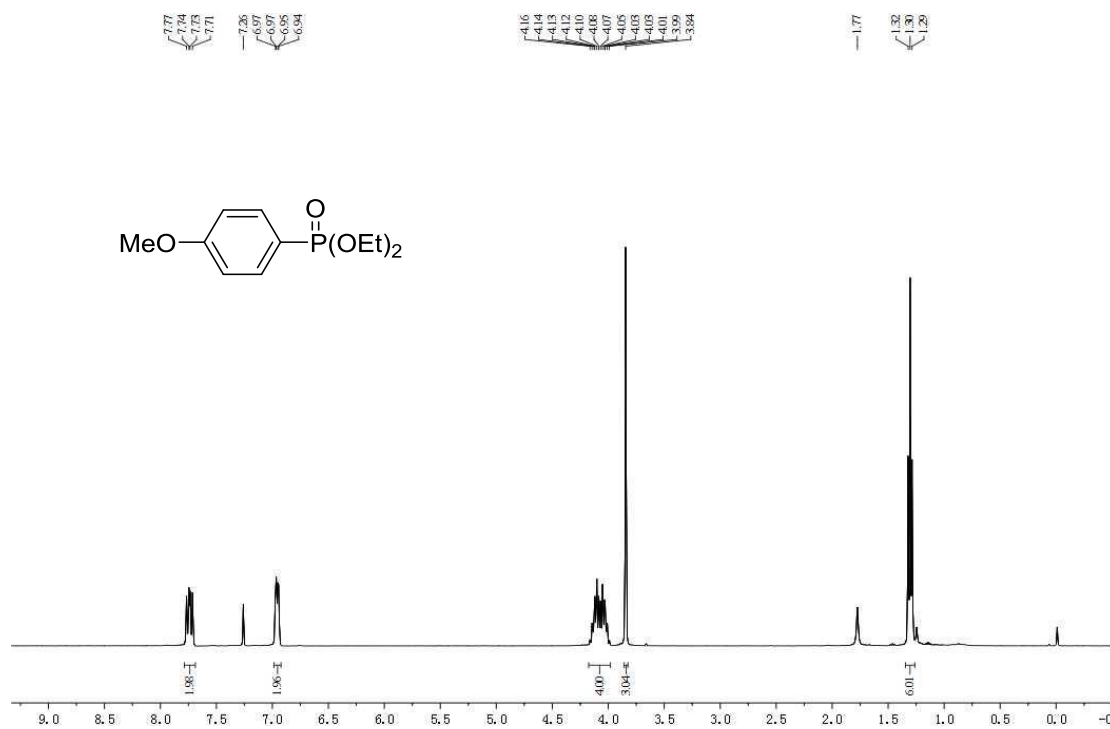

**<sup>13</sup>C NMR (101 MHz, CDCl<sub>3</sub>) spectrum for 3n**

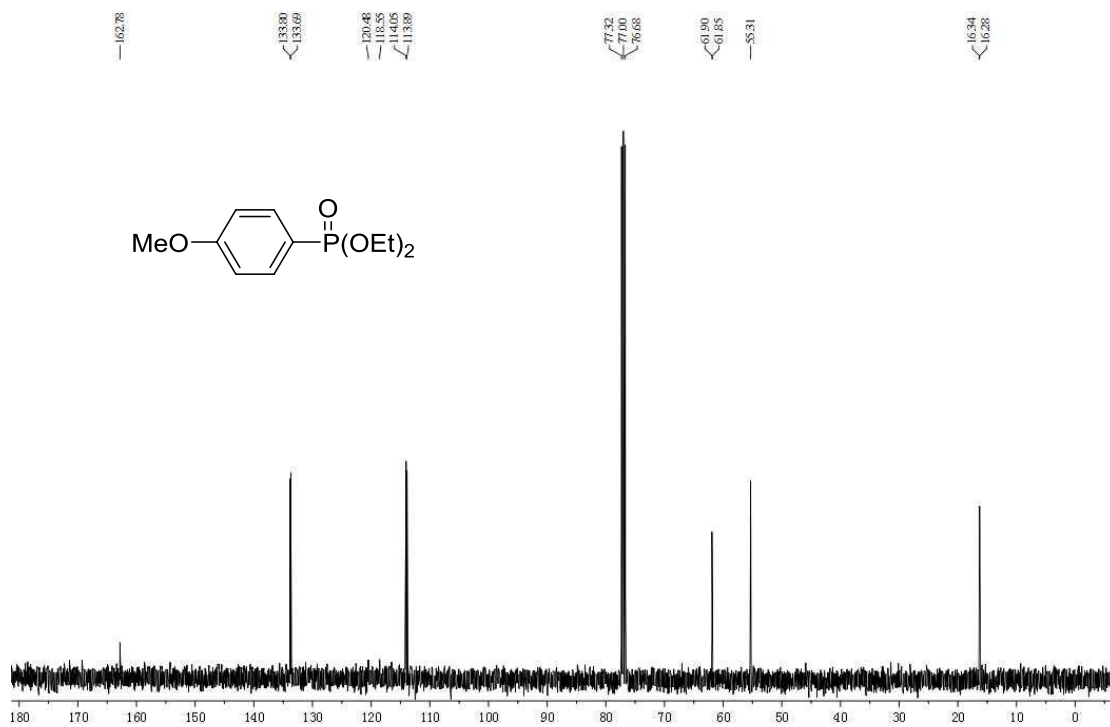

**<sup>31</sup>P NMR (162 MHz, CDCl<sub>3</sub>) spectrum for 3n**

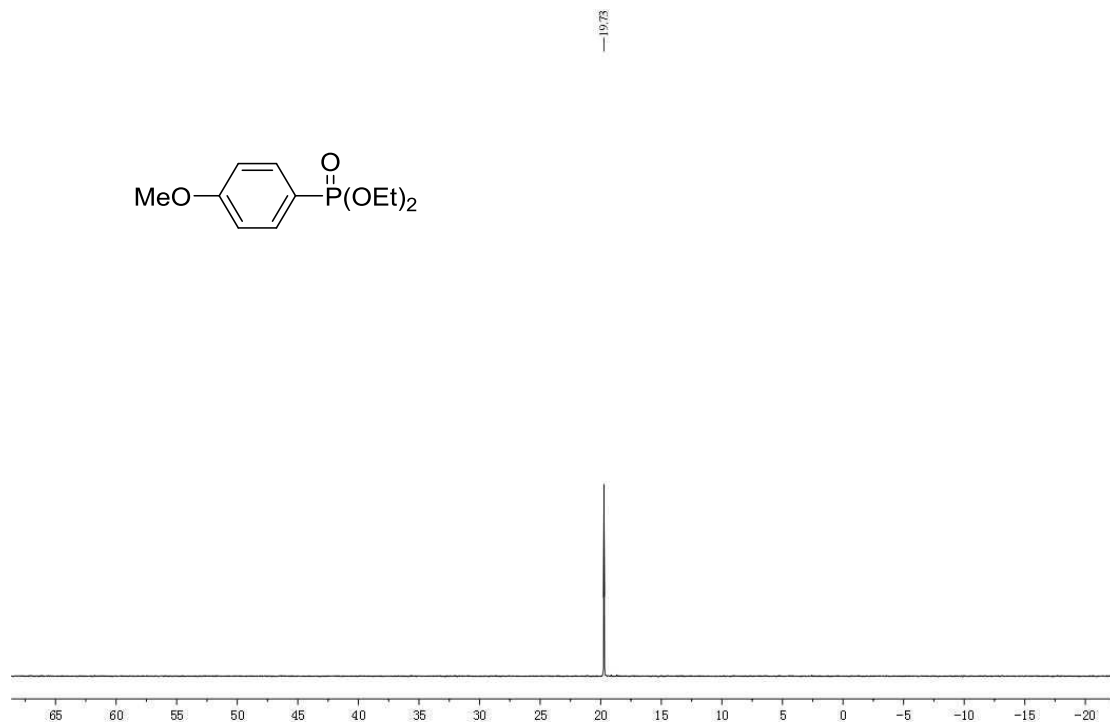

**<sup>1</sup>H NMR (600 MHz, CDCl<sub>3</sub>) spectrum for 3o**

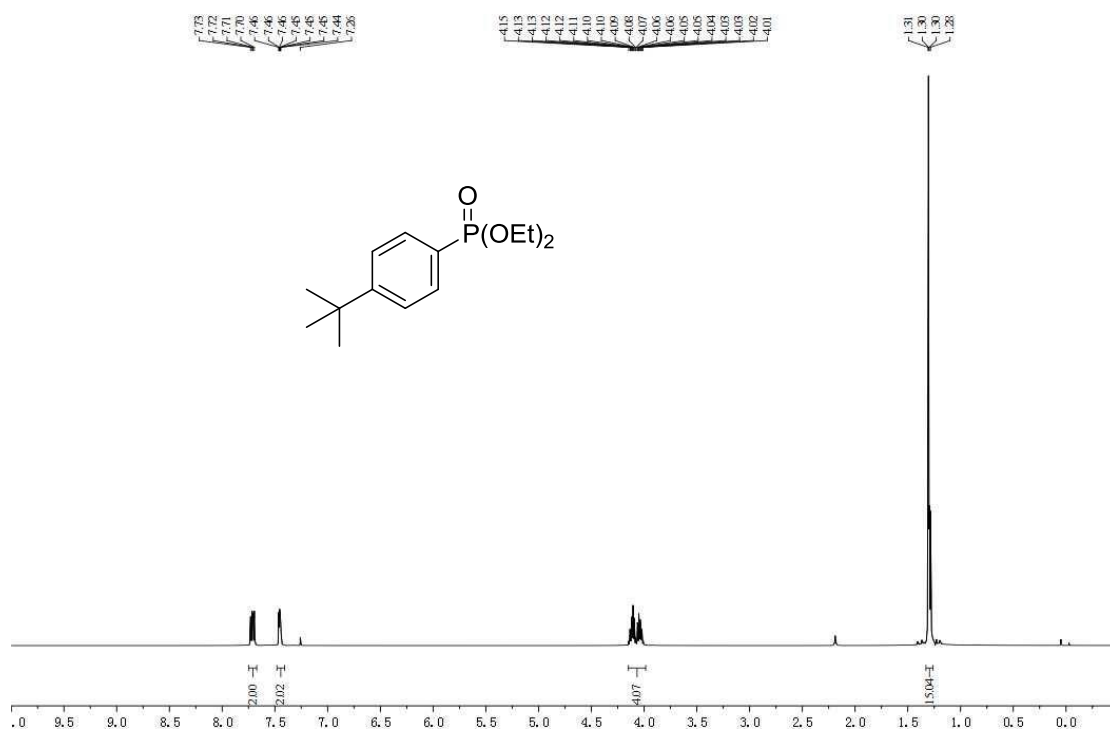

**<sup>13</sup>C NMR (151 MHz, CDCl<sub>3</sub>) spectrum for 3o**

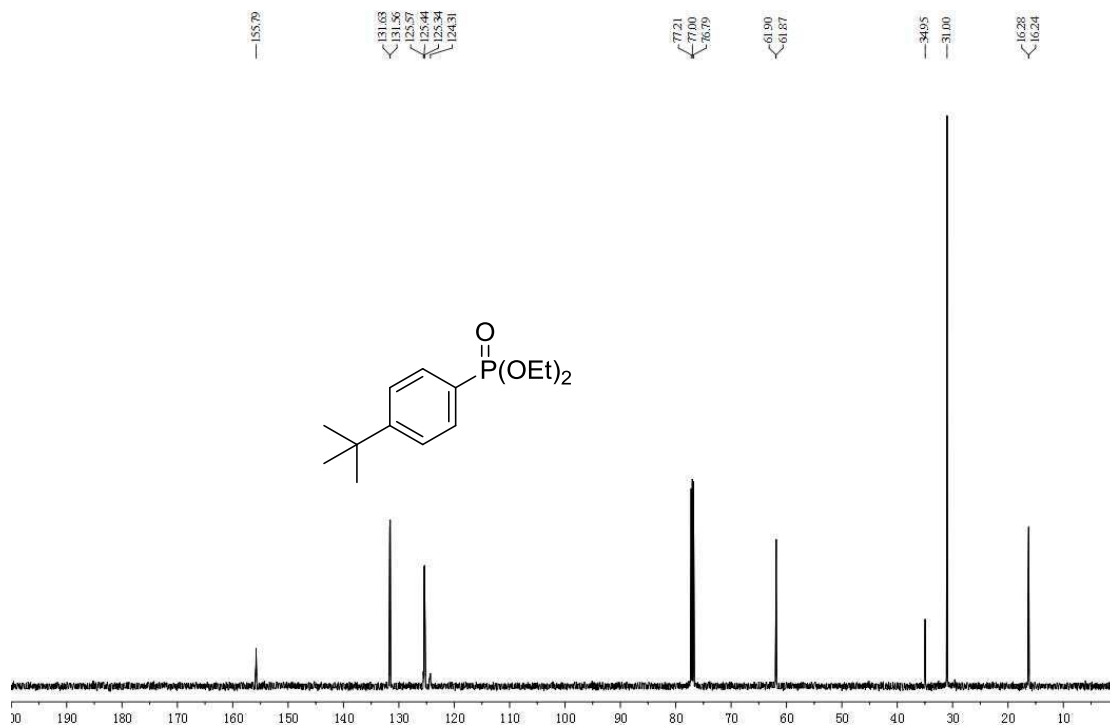

**$^{31}\text{P}$  NMR (243 MHz,  $\text{CDCl}_3$ ) spectrum for 3o**

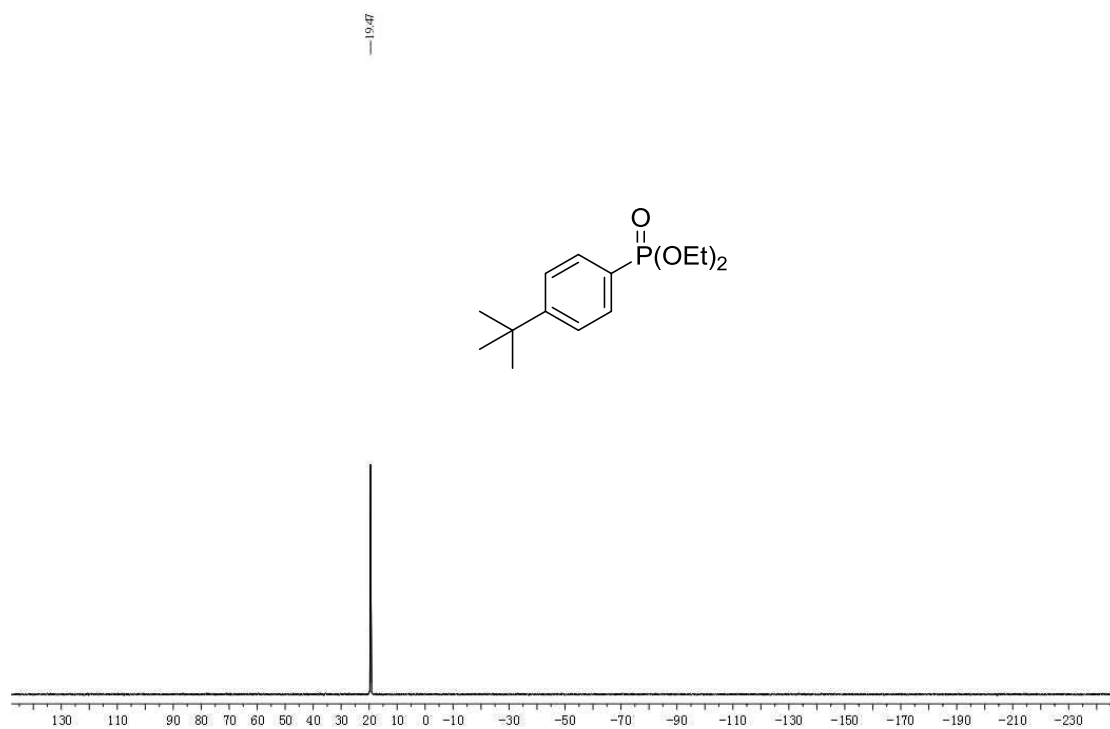

**$^1\text{H}$  NMR (400 MHz,  $\text{CDCl}_3$ ) spectrum for 3p**

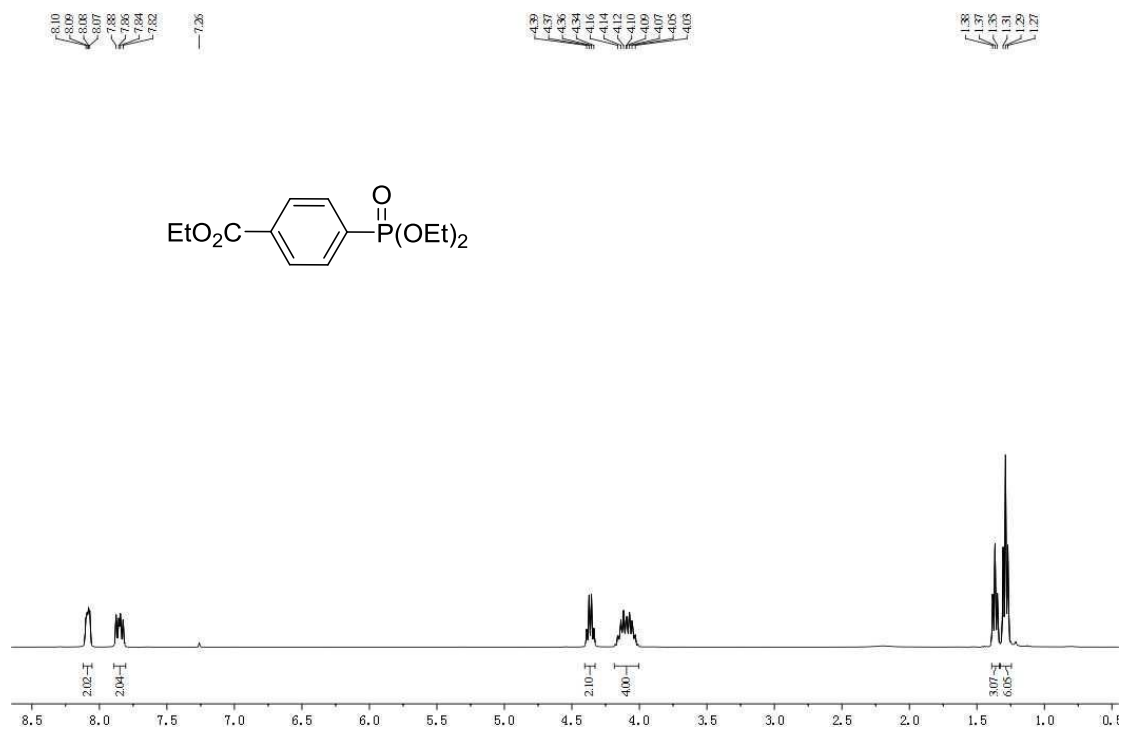



**<sup>13</sup>C NMR (101 MHz, CDCl<sub>3</sub>) spectrum for 3p**

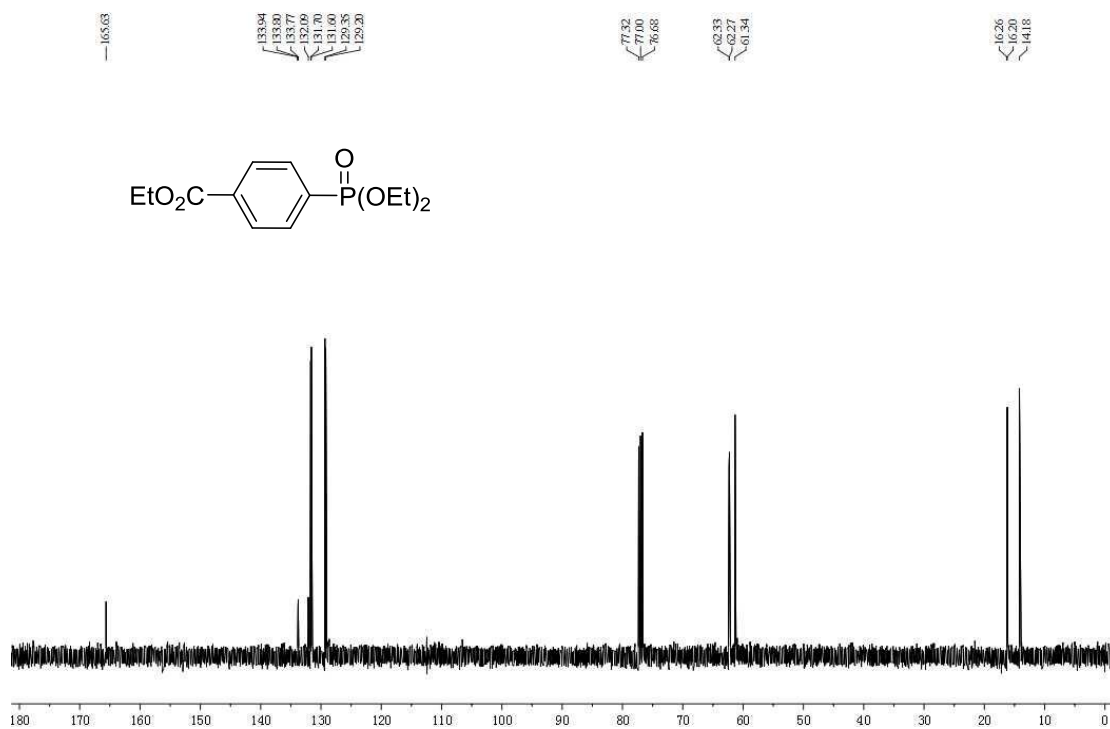

**<sup>31</sup>P NMR (162 MHz, CDCl<sub>3</sub>) spectrum for 3p**

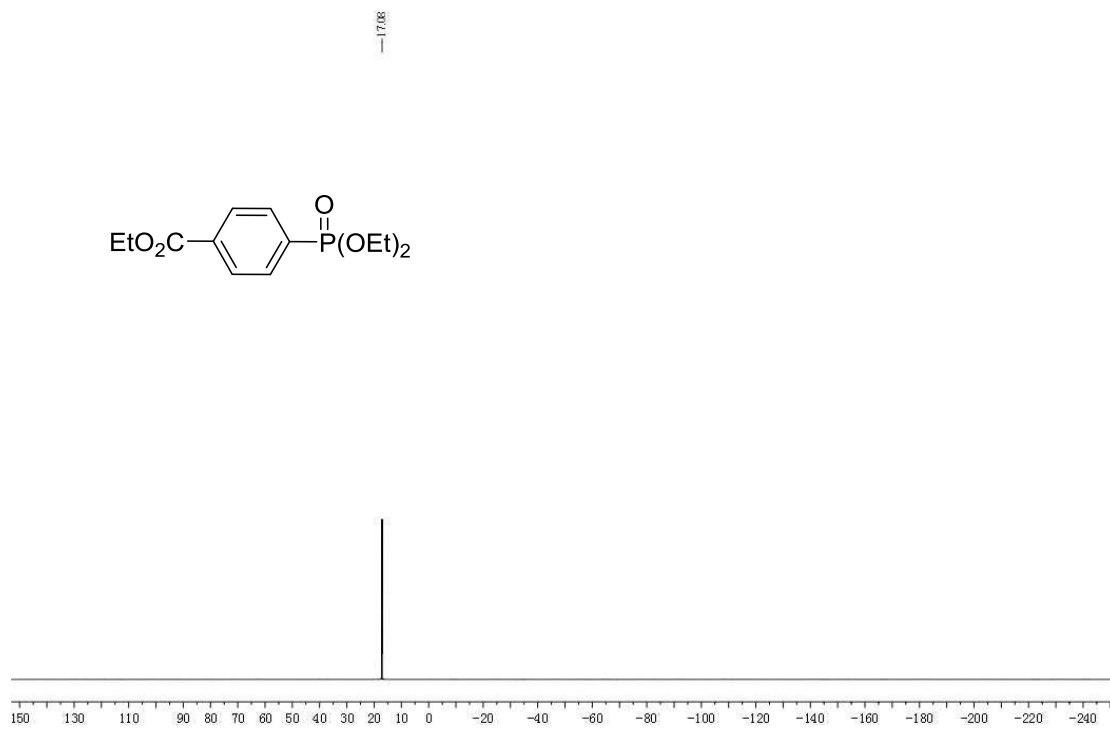

### $^1\text{H}$ NMR (600 MHz, $\text{CDCl}_3$ ) spectrum for 3q

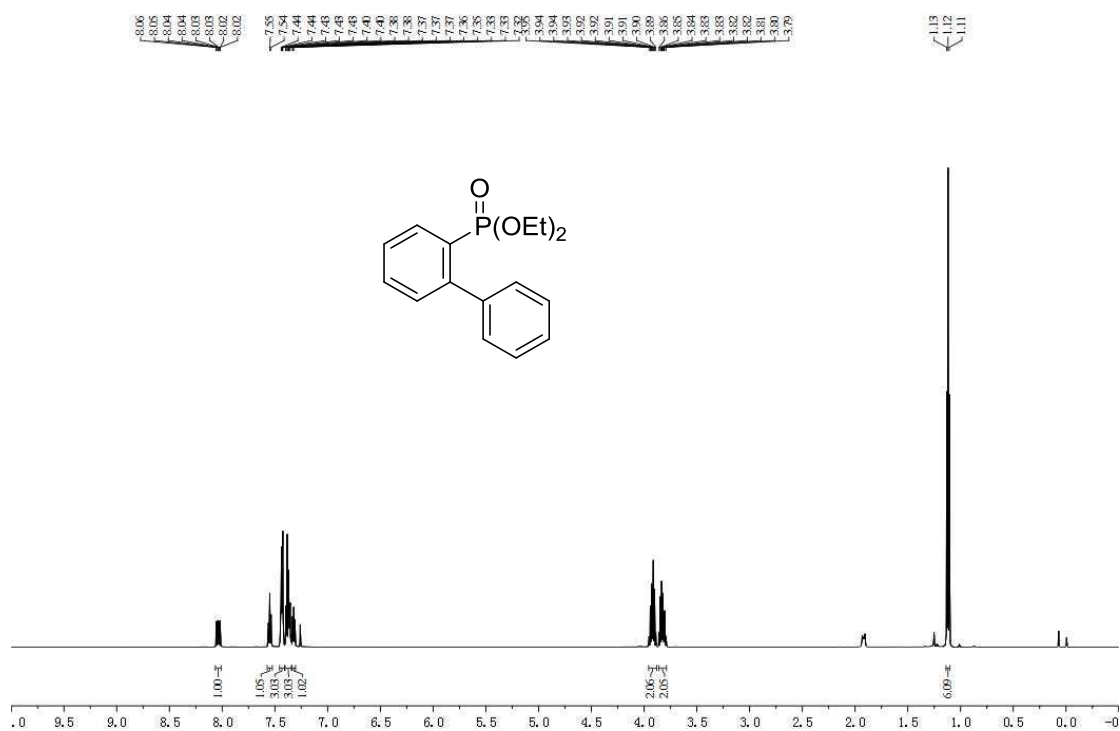

### $^{13}\text{C}$ NMR (151 MHz, $\text{CDCl}_3$ ) spectrum for 3q

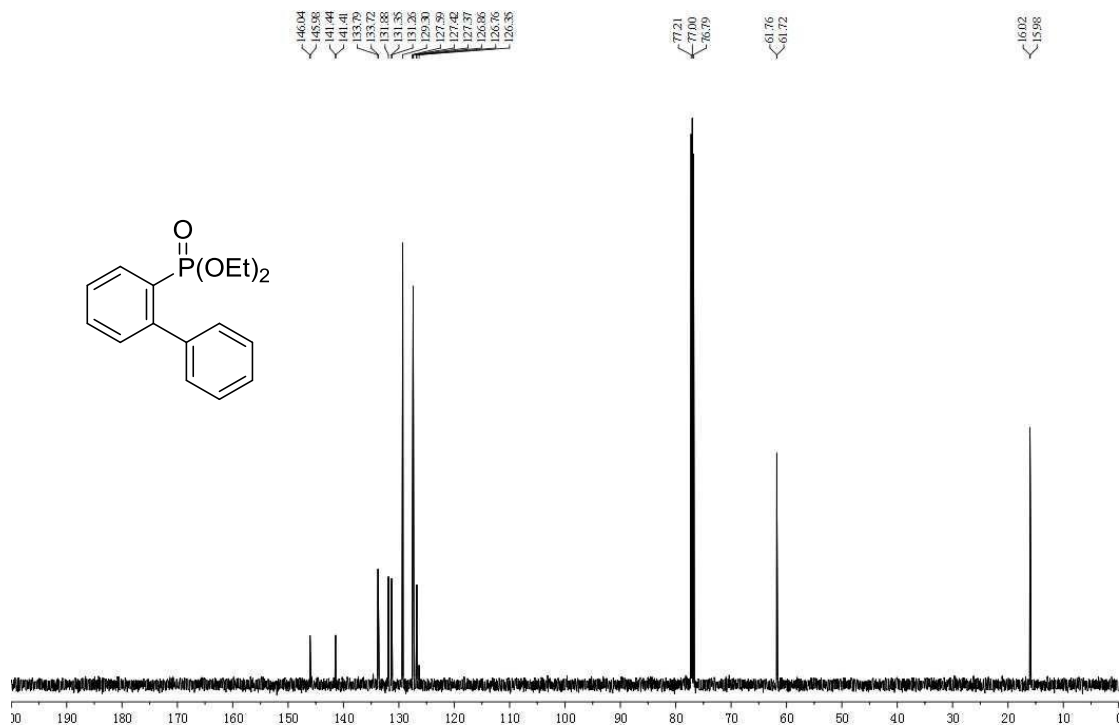

**<sup>31</sup>P NMR (243 MHz, CDCl<sub>3</sub>) spectrum for 3q**

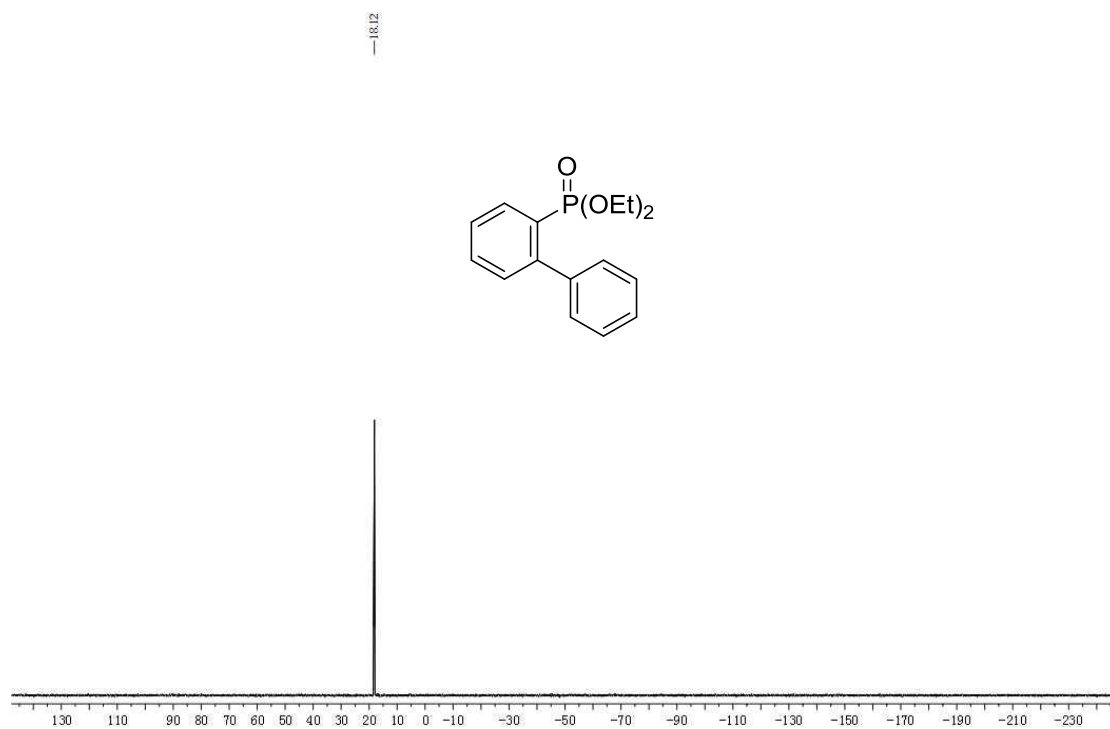

**<sup>1</sup>H NMR (600 MHz, CDCl<sub>3</sub>) spectrum for 3r**

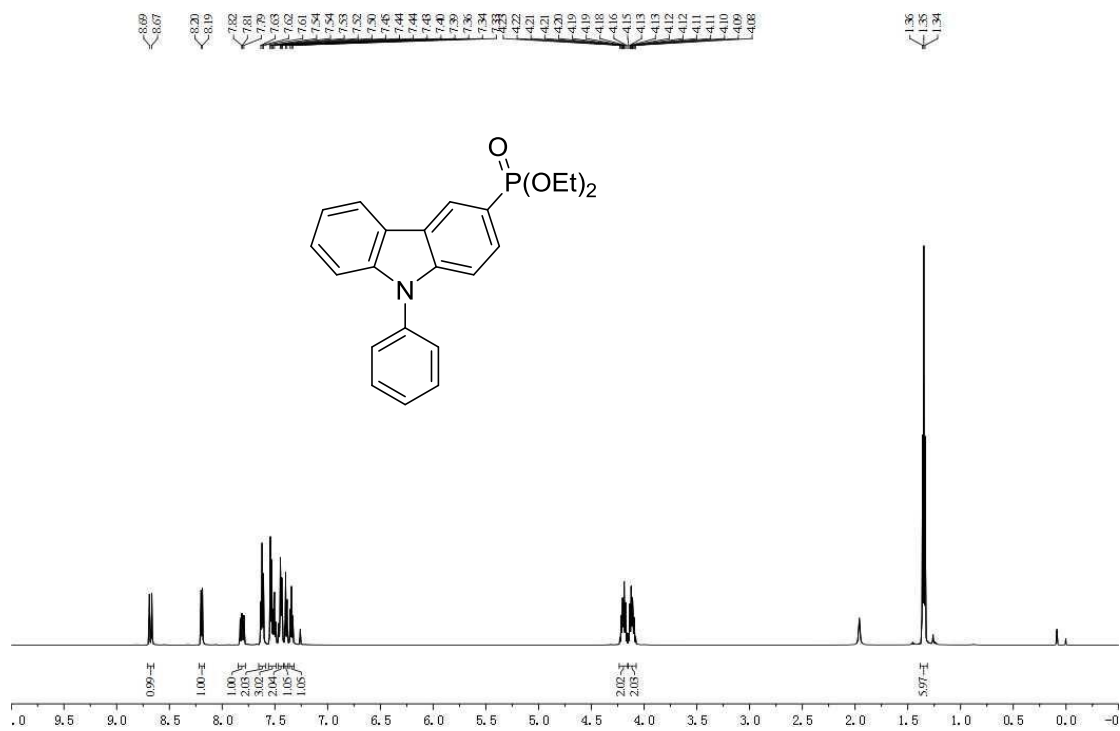

**<sup>13</sup>C NMR (151 MHz, CDCl<sub>3</sub>) spectrum for 3r**

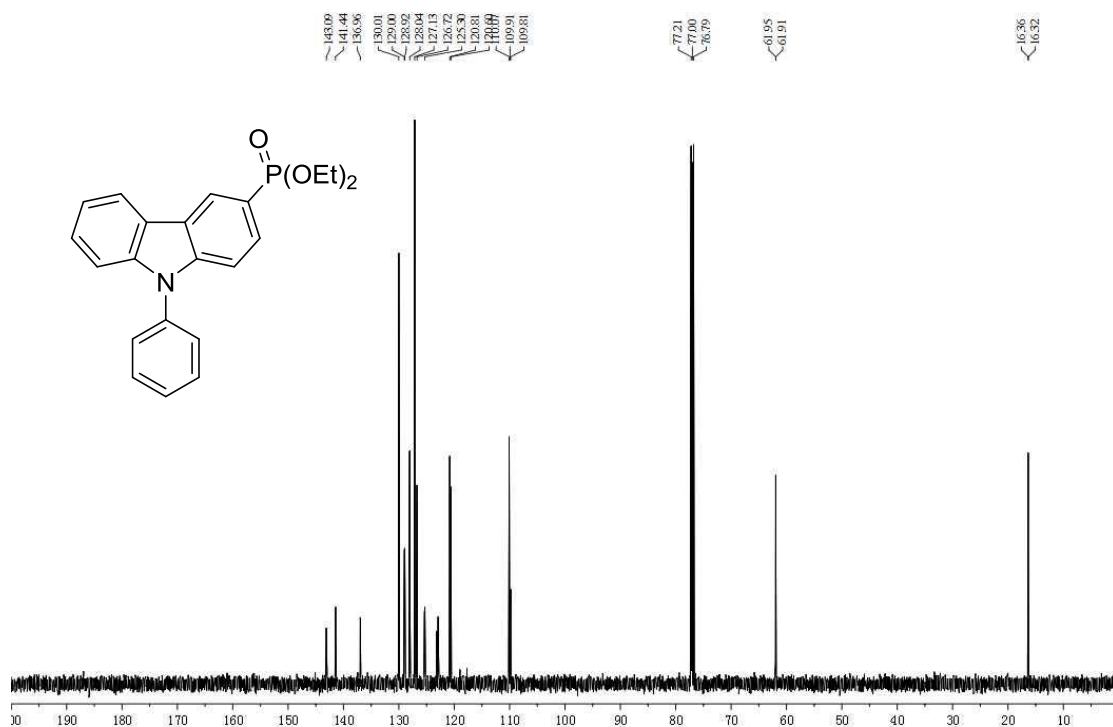

**<sup>31</sup>P NMR (243 MHz, CDCl<sub>3</sub>) spectrum for 3r**

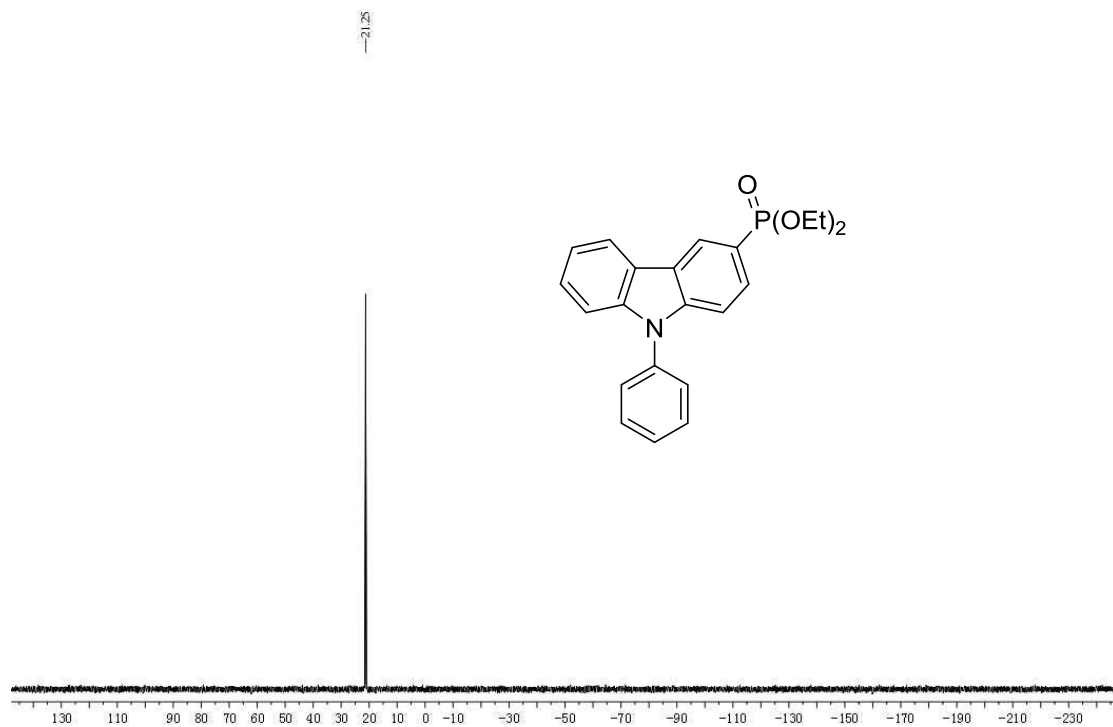

**<sup>1</sup>H NMR (400 MHz, CDCl<sub>3</sub>) spectrum for 3s**

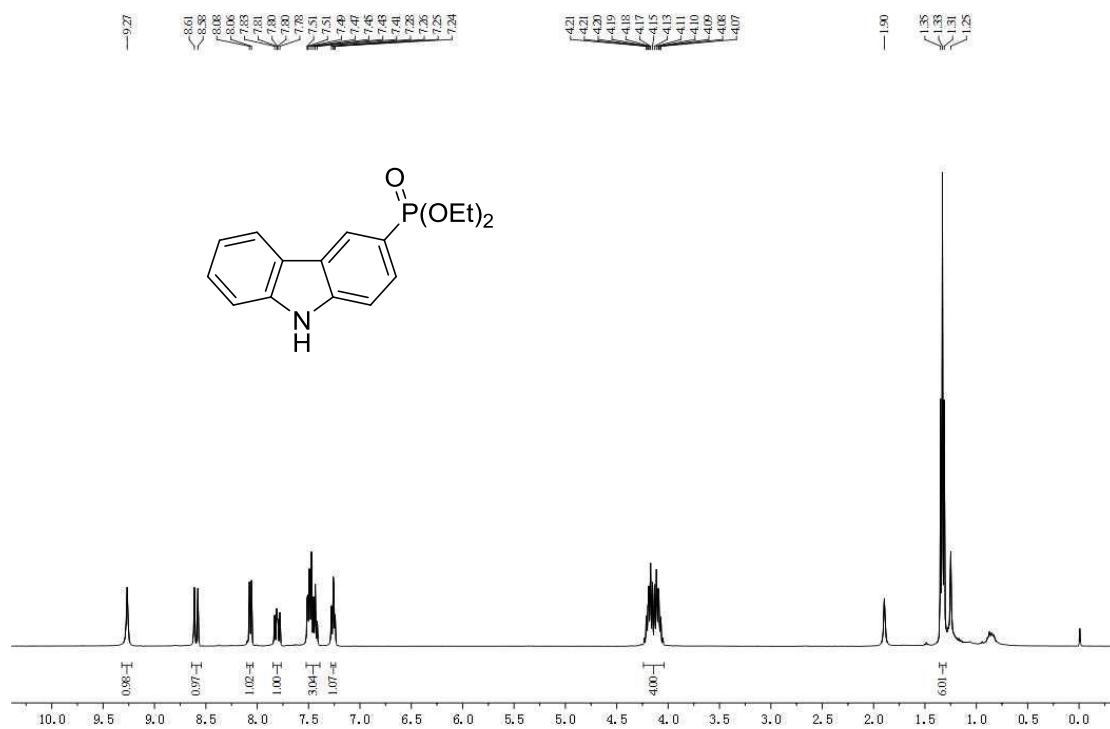

**<sup>13</sup>C NMR (101 MHz, CDCl<sub>3</sub>) spectrum for 3s**

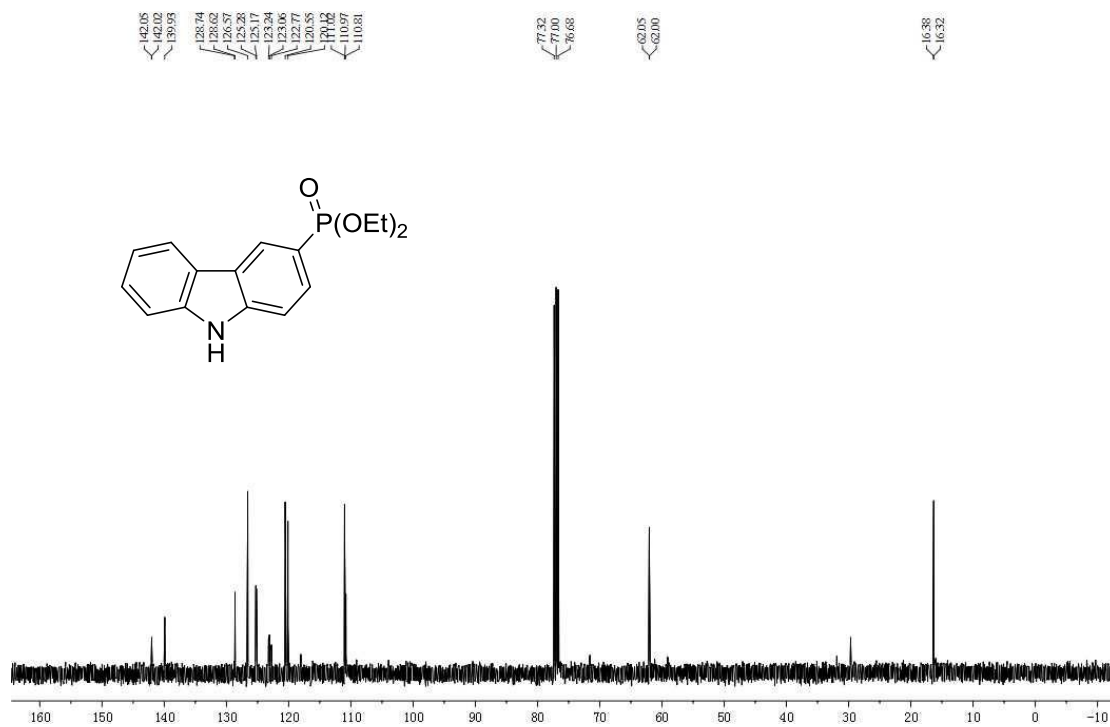

<sup>31</sup>P NMR (162 MHz, CDCl<sub>3</sub>) spectrum for 3s

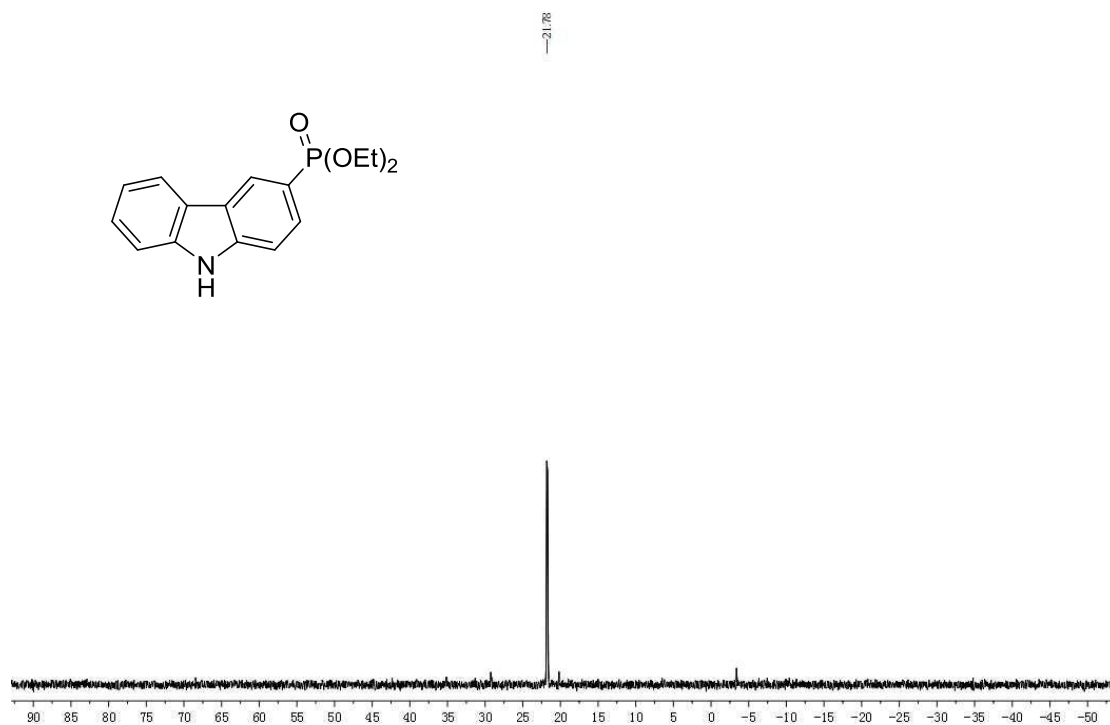

<sup>1</sup>H NMR (600 MHz, CDCl<sub>3</sub>) spectrum for 3t

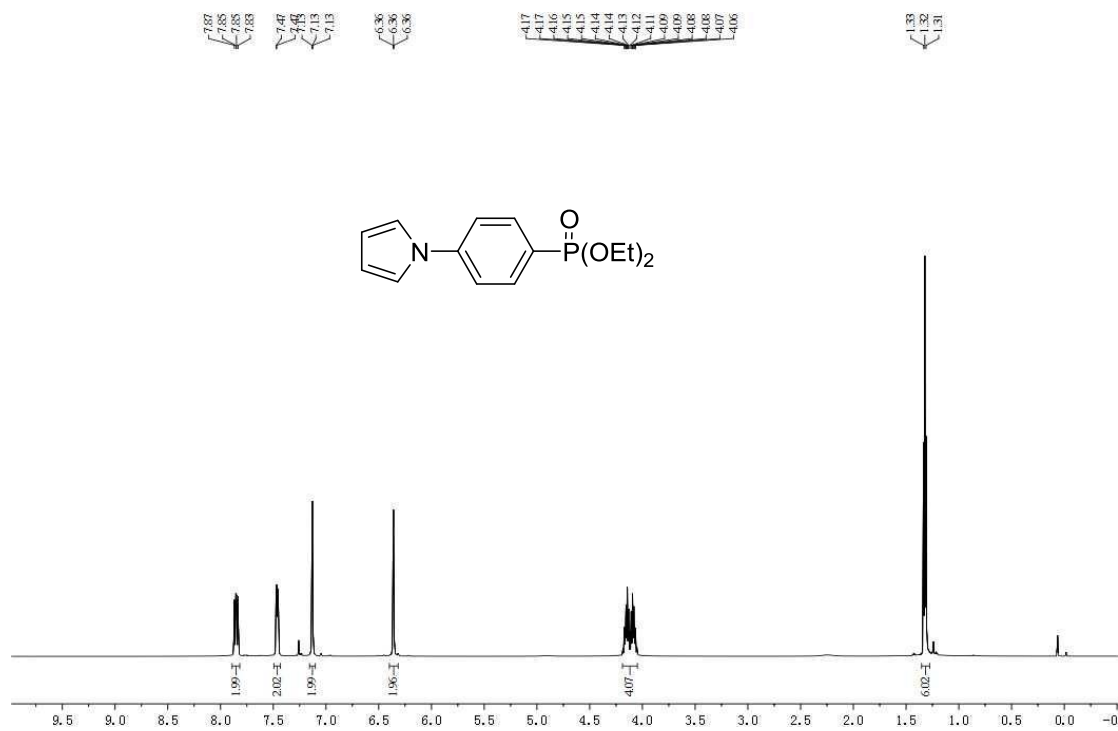

**<sup>13</sup>C NMR (151 MHz, CDCl<sub>3</sub>) spectrum for 3t**

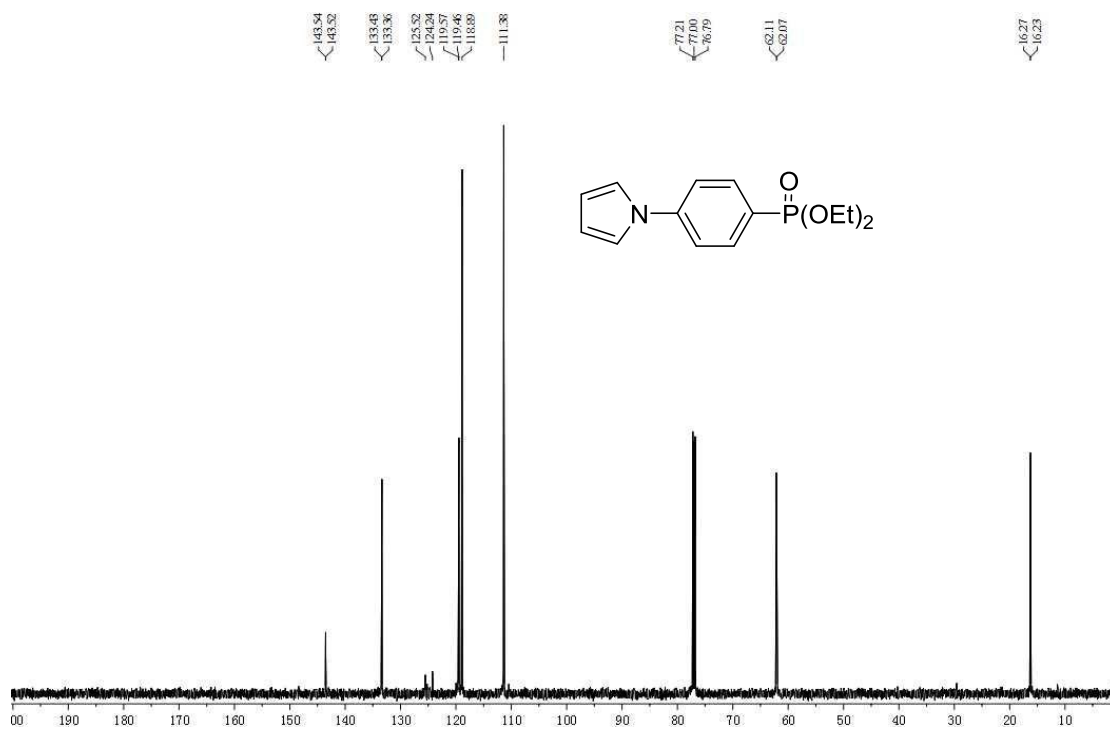

**<sup>31</sup>P NMR (243 MHz, CDCl<sub>3</sub>) spectrum for 3t**

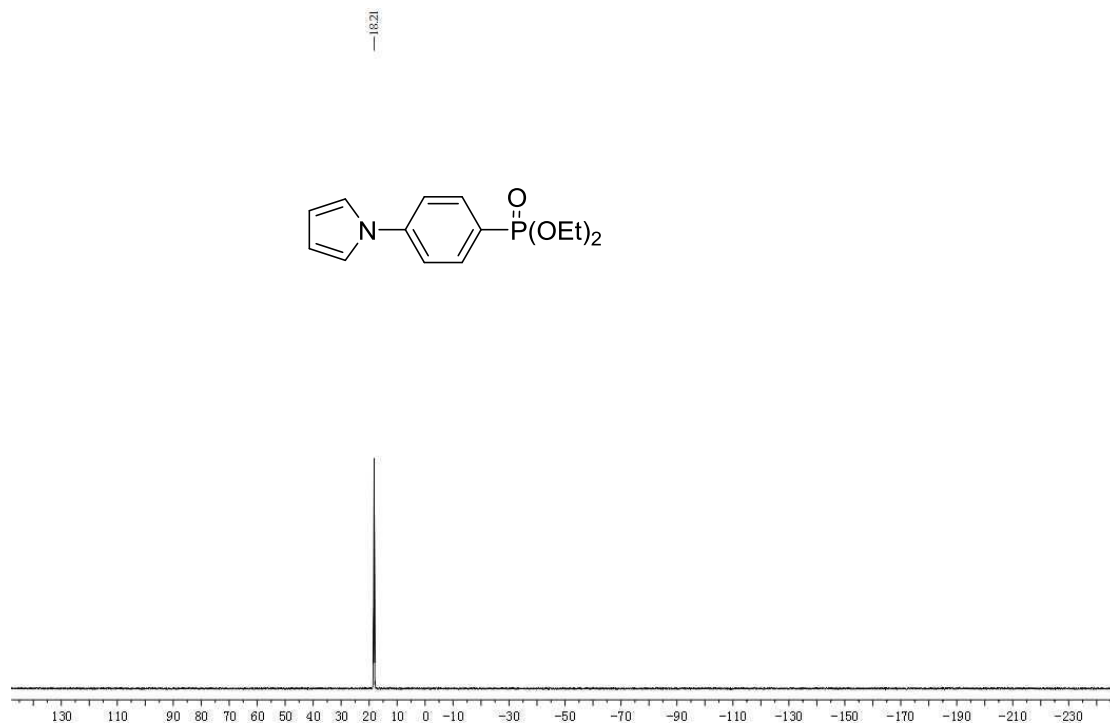

**$^1\text{H}$  NMR (400 MHz,  $\text{CDCl}_3$ ) spectrum for 3u**

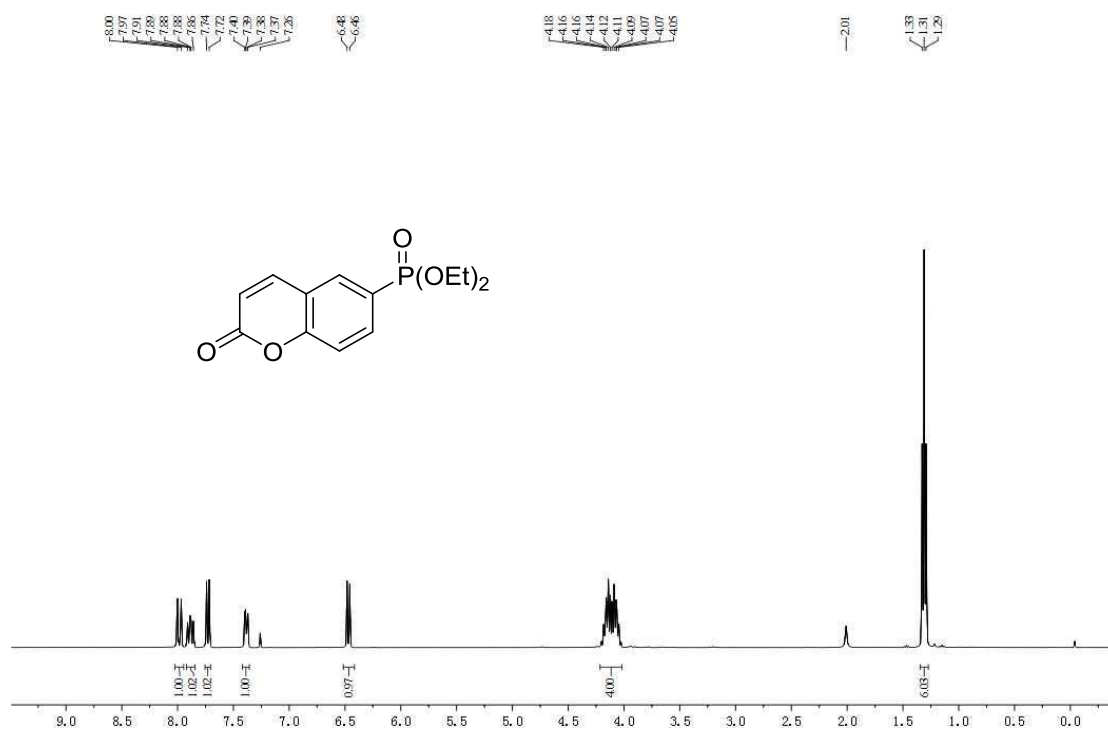

**$^{13}\text{C}$  NMR (101 MHz,  $\text{CDCl}_3$ ) spectrum for 3u**

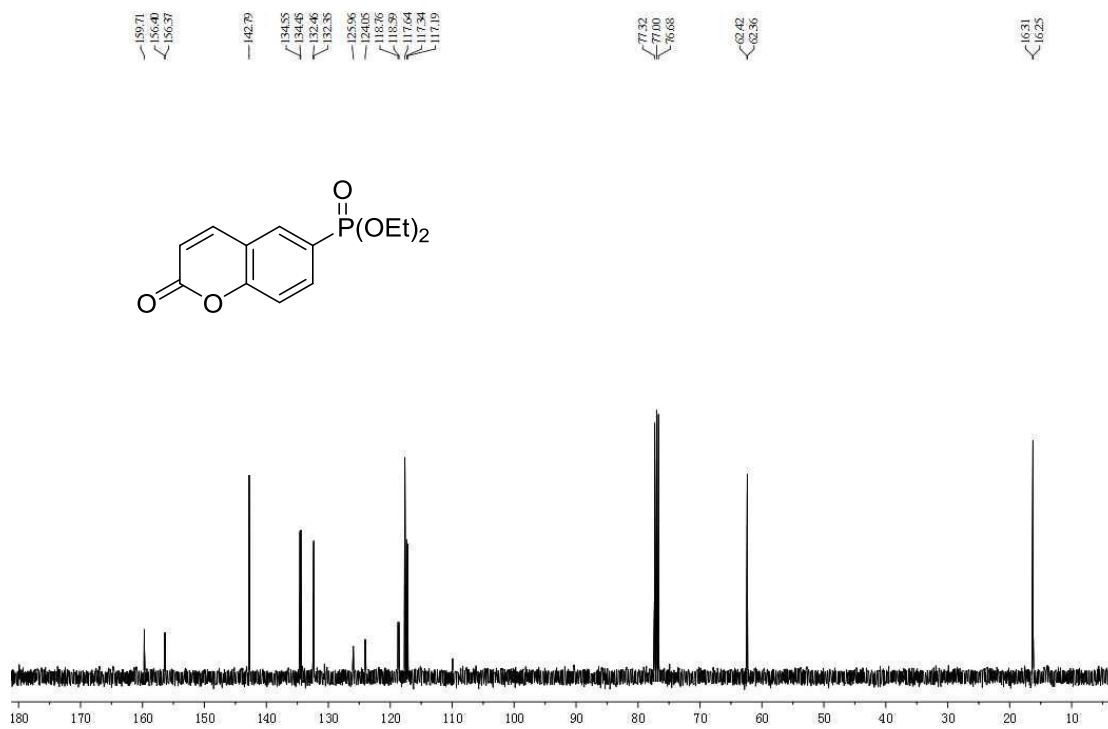



**<sup>31</sup>P NMR (162 MHz, CDCl<sub>3</sub>) spectrum for 3u**

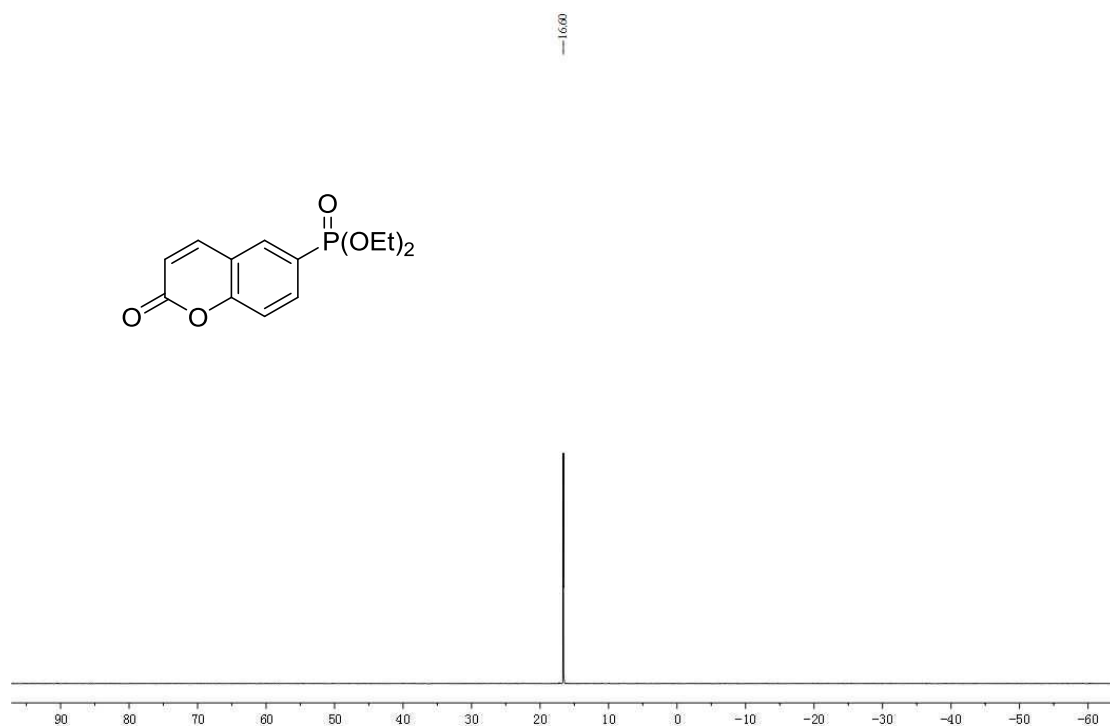

**<sup>1</sup>H NMR (400 MHz, CDCl<sub>3</sub>) spectrum for 3v**

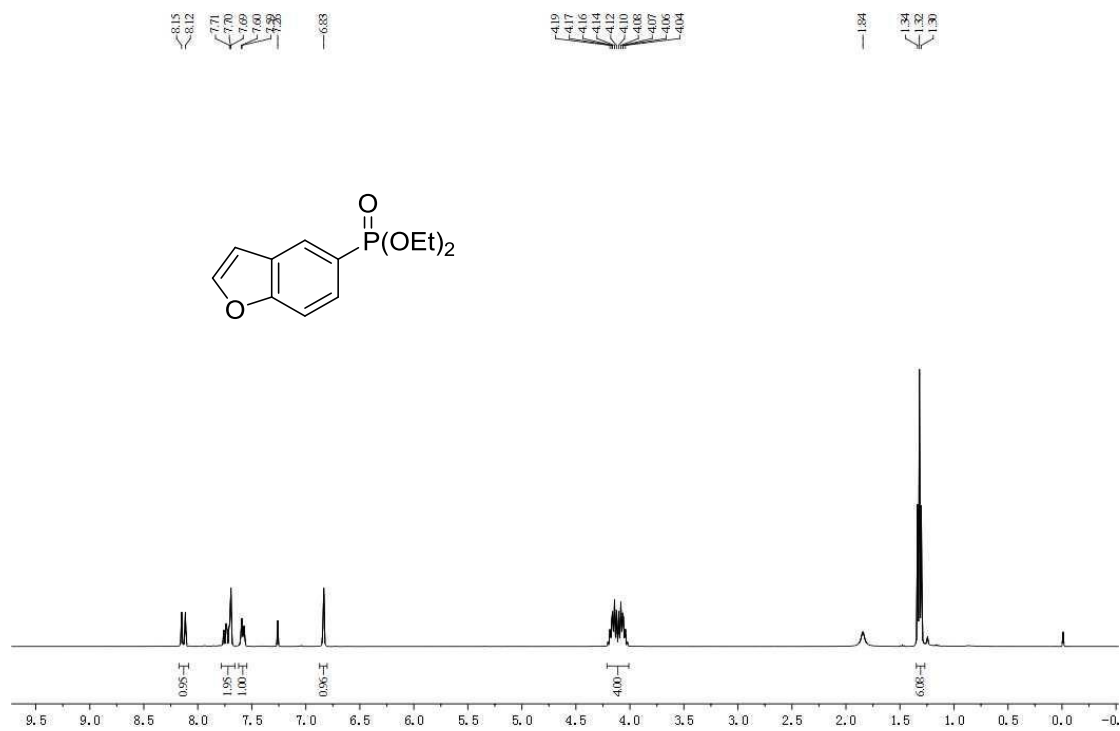

**<sup>13</sup>C NMR (101 MHz, CDCl<sub>3</sub>) spectrum for 3v**

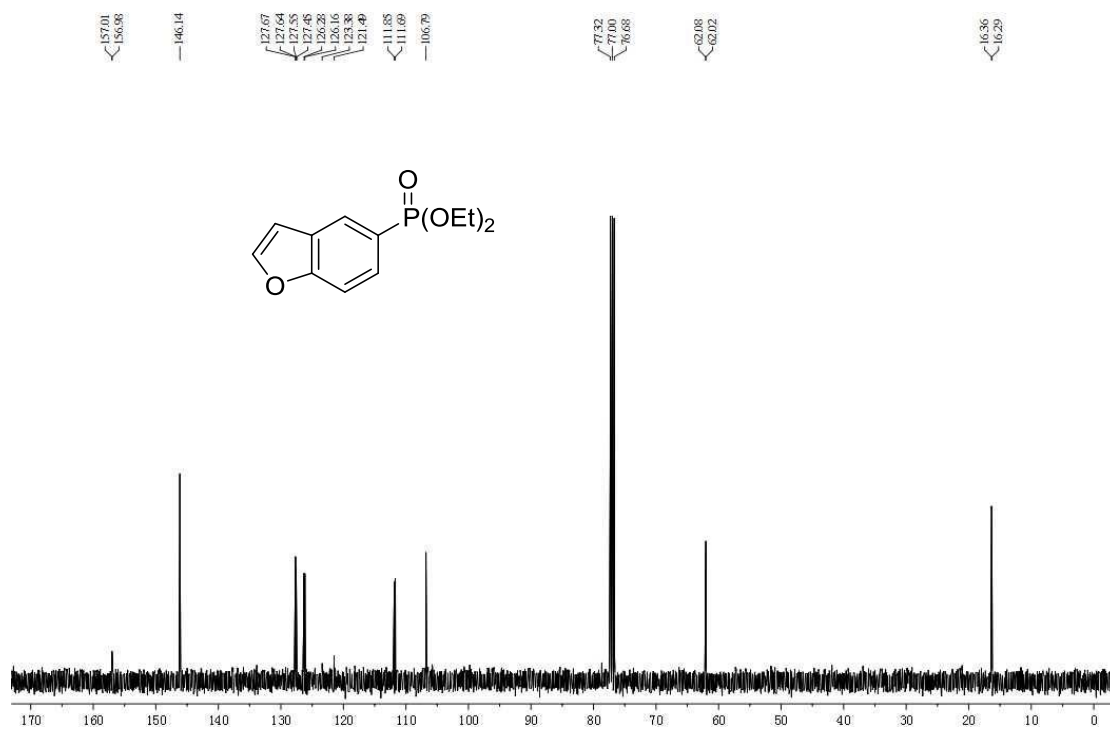

**<sup>31</sup>P NMR (162 MHz, CDCl<sub>3</sub>) spectrum for 3v**

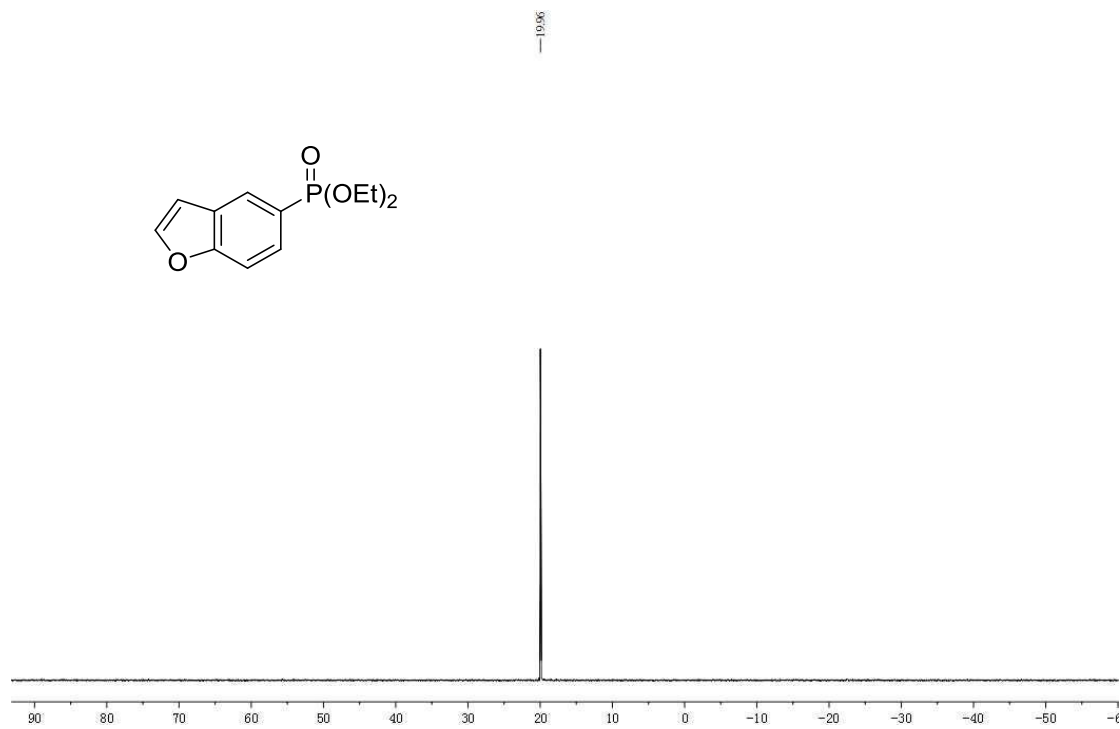

**<sup>1</sup>H NMR (400 MHz, CDCl<sub>3</sub>) spectrum for 3w**

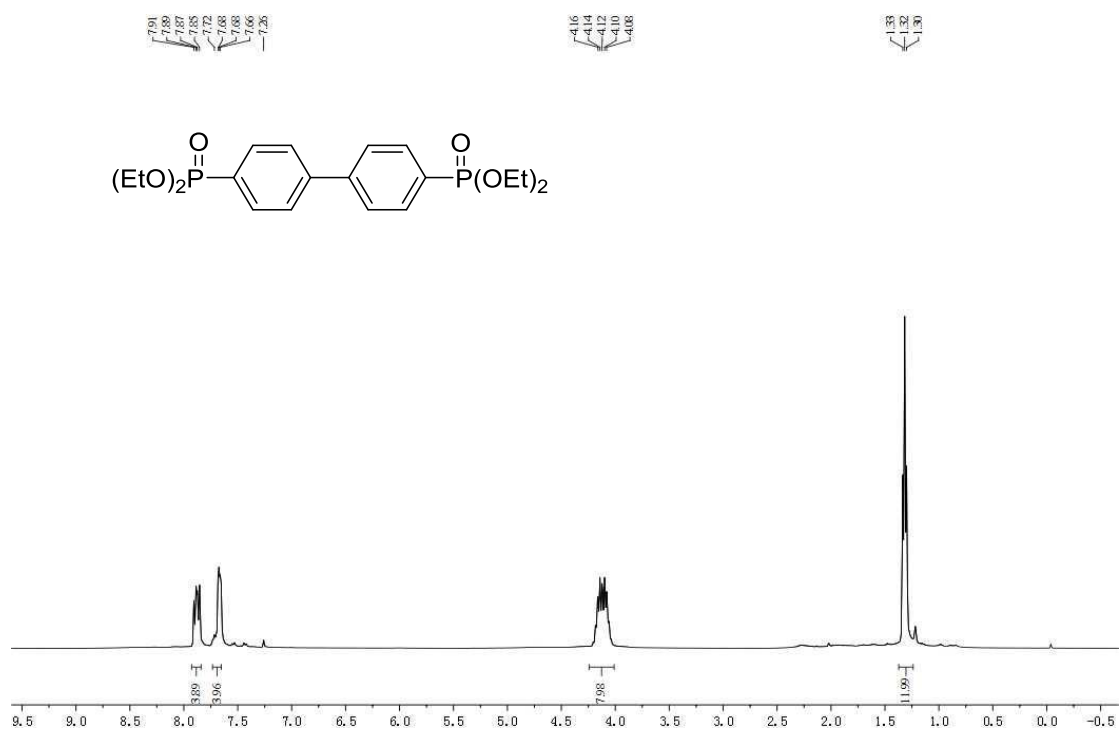

**<sup>13</sup>C NMR (101 MHz, CDCl<sub>3</sub>) spectrum for 3w**

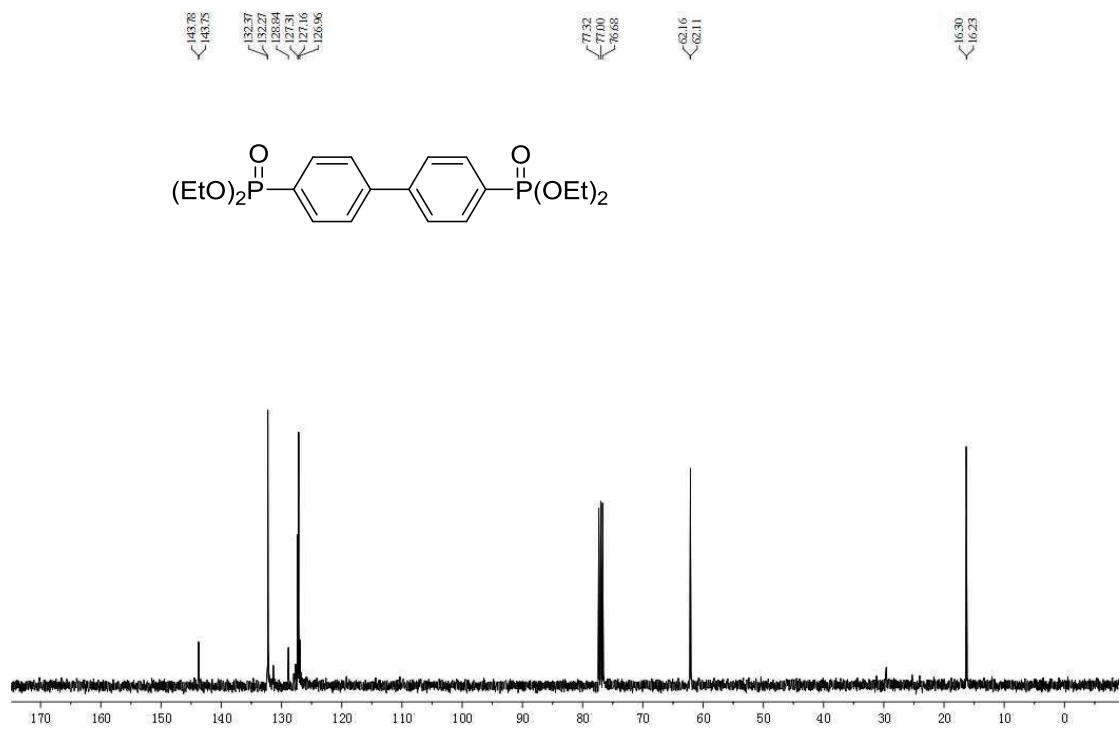

**$^{31}\text{P}$  NMR (162 MHz,  $\text{CDCl}_3$ ) spectrum for 3w**

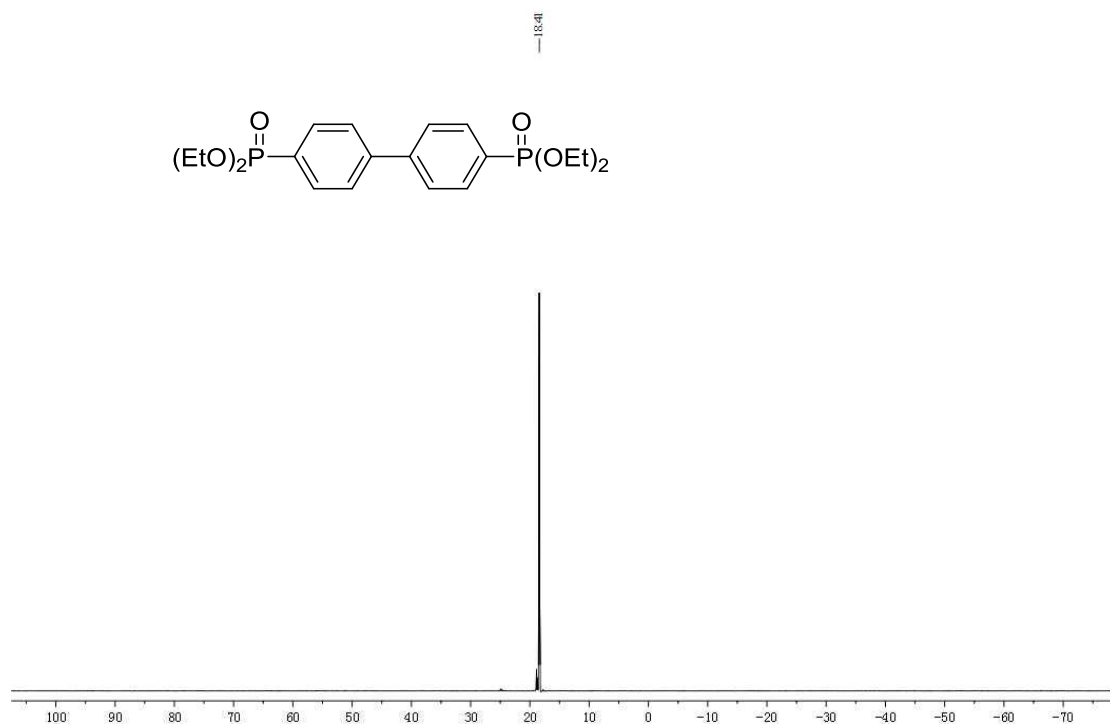

**$^1\text{H}$  NMR (400 MHz,  $\text{CDCl}_3$ ) spectrum for 3xa**

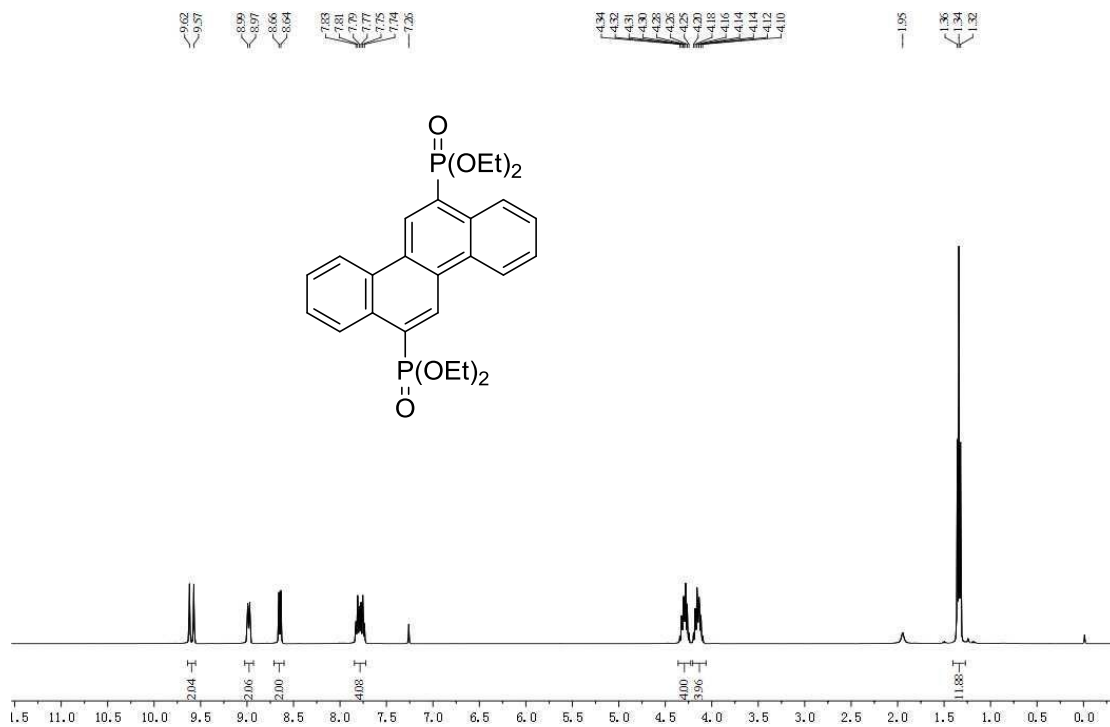

**<sup>13</sup>C NMR (101 MHz, CDCl<sub>3</sub>) spectrum for 3xa**

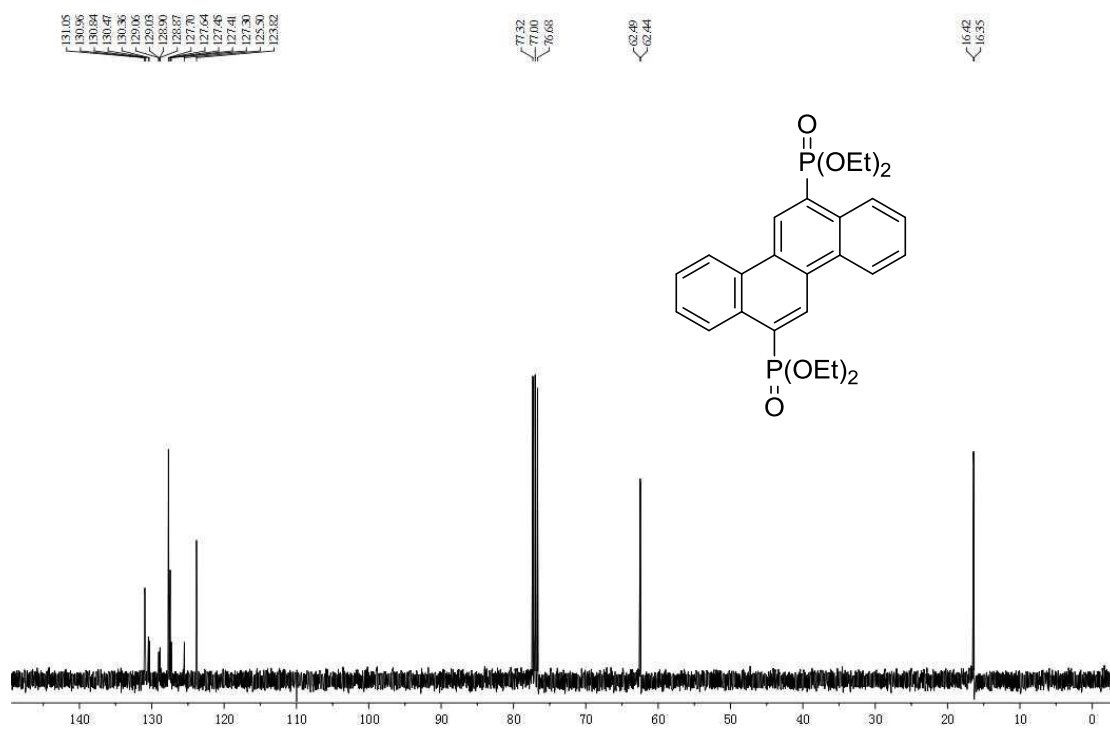

**<sup>31</sup>P NMR (162 MHz, CDCl<sub>3</sub>) spectrum for 3xa**

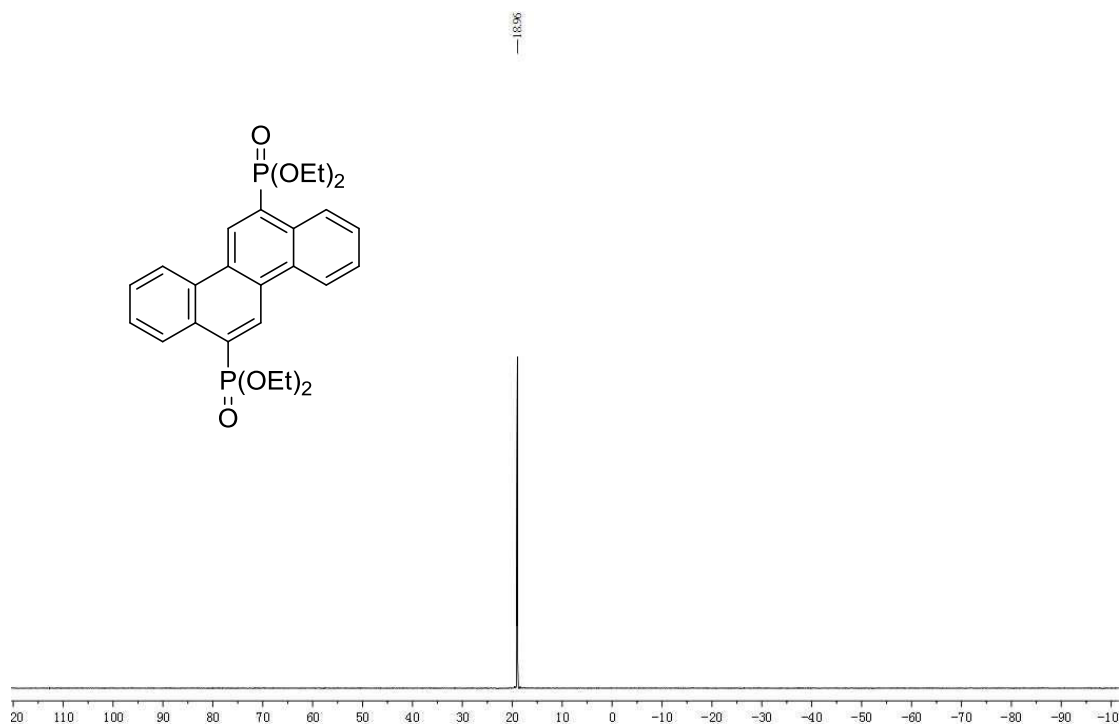

**<sup>1</sup>H NMR (400 MHz, CDCl<sub>3</sub>) spectrum for 3xb**

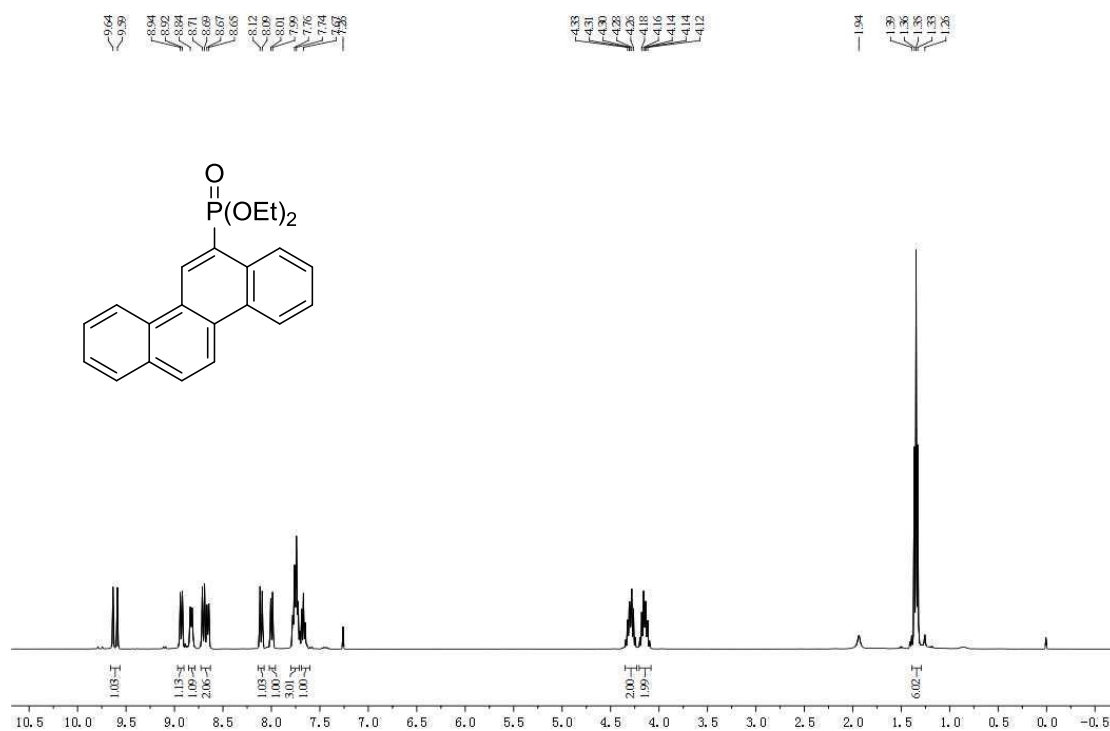

**<sup>13</sup>C NMR (101 MHz, CDCl<sub>3</sub>) spectrum for 3xb**

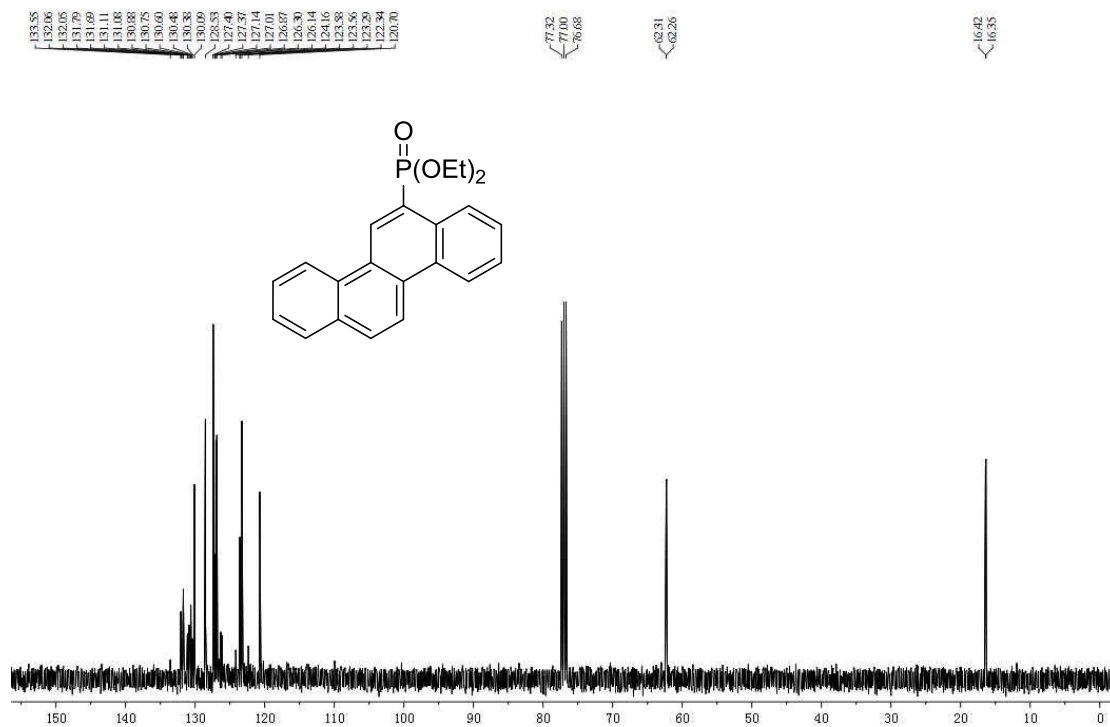

**<sup>31</sup>P NMR (162 MHz, CDCl<sub>3</sub>) spectrum for 3xb**

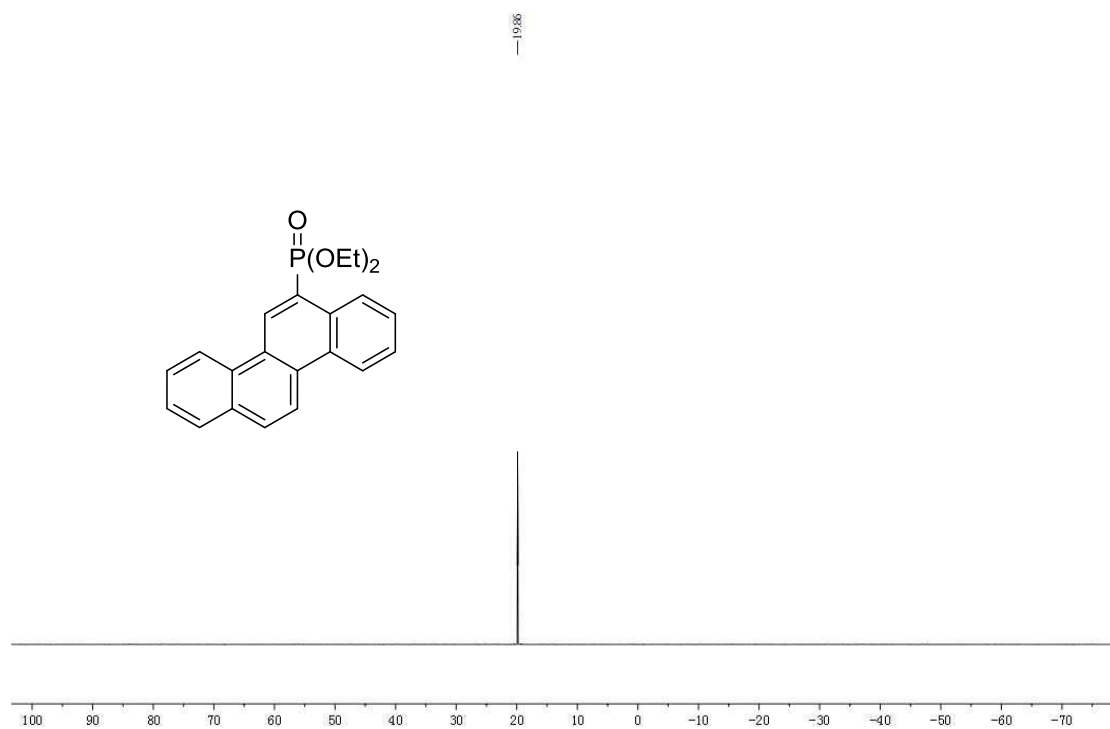

**<sup>1</sup>H NMR (400 MHz, CDCl<sub>3</sub>) spectrum for 3y**

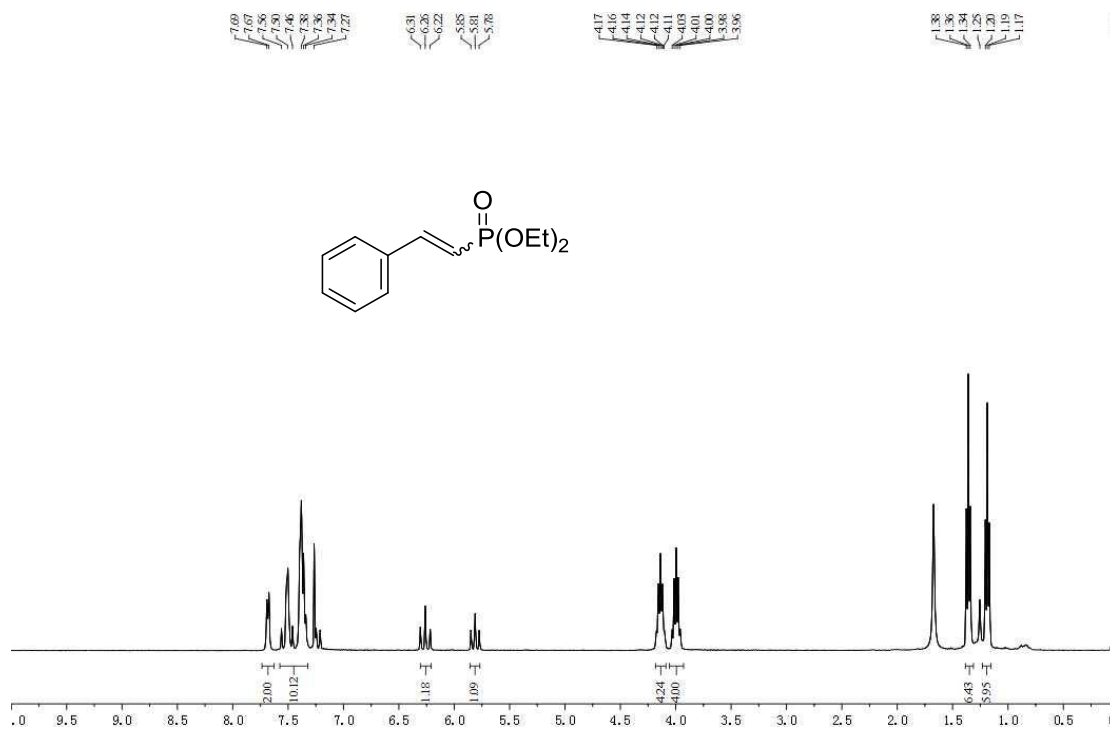

**<sup>13</sup>C NMR (101 MHz, CDCl<sub>3</sub>) spectrum for 3y**

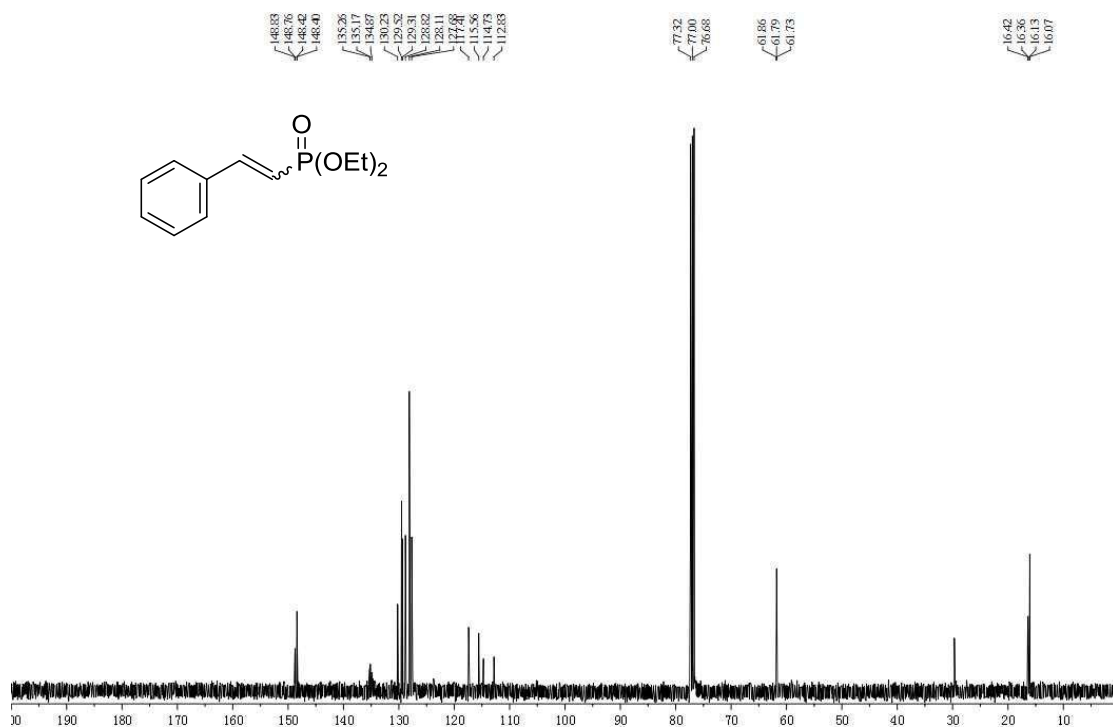

**<sup>31</sup>P NMR (162 MHz, CDCl<sub>3</sub>) spectrum for 3y**

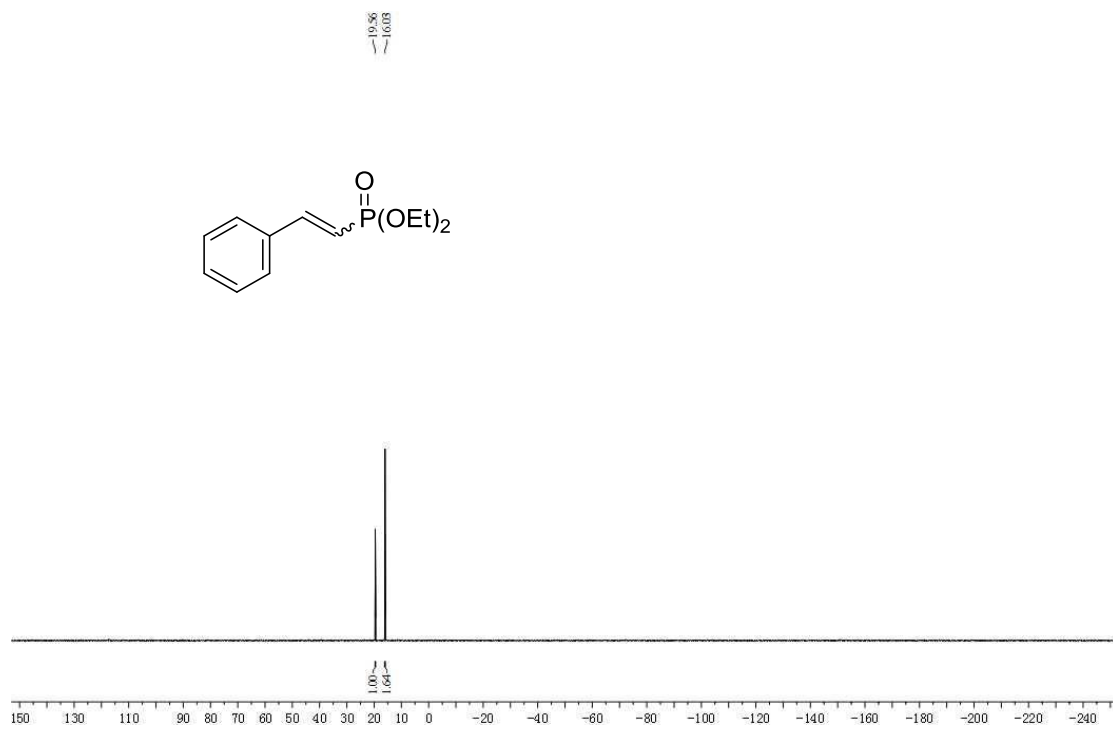



<sup>1</sup>H NMR (400 MHz, CDCl<sub>3</sub>) spectrum for 3z

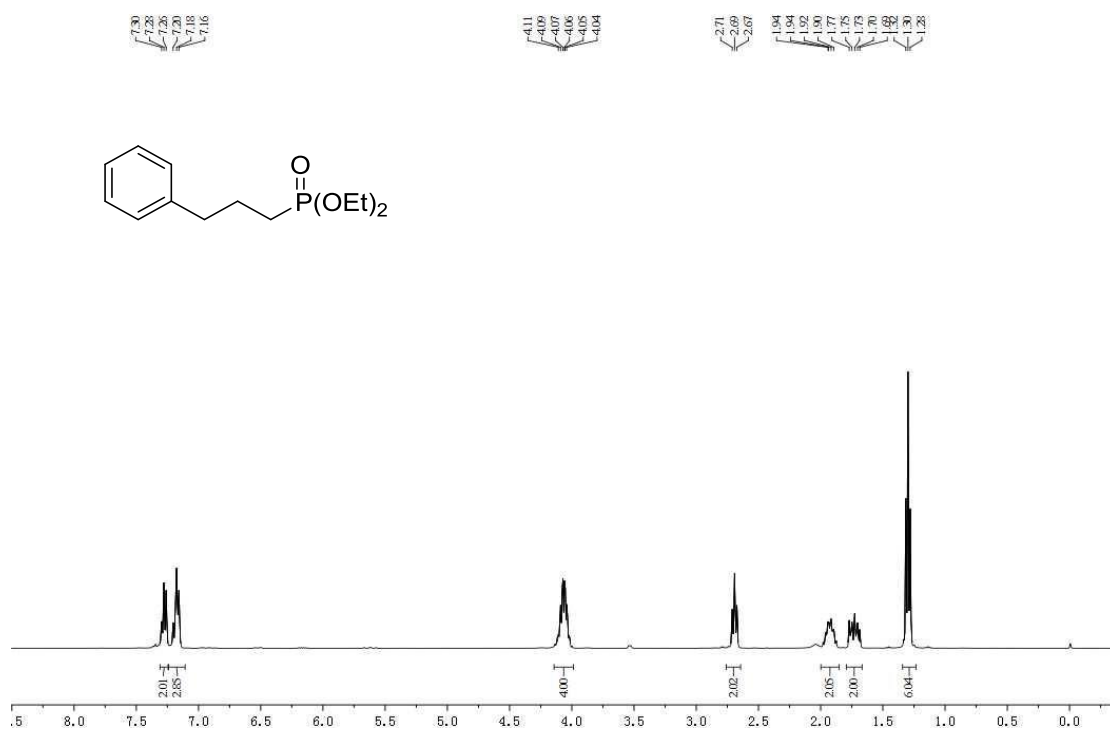

<sup>13</sup>C NMR (101 MHz, CDCl<sub>3</sub>) spectrum for 3z

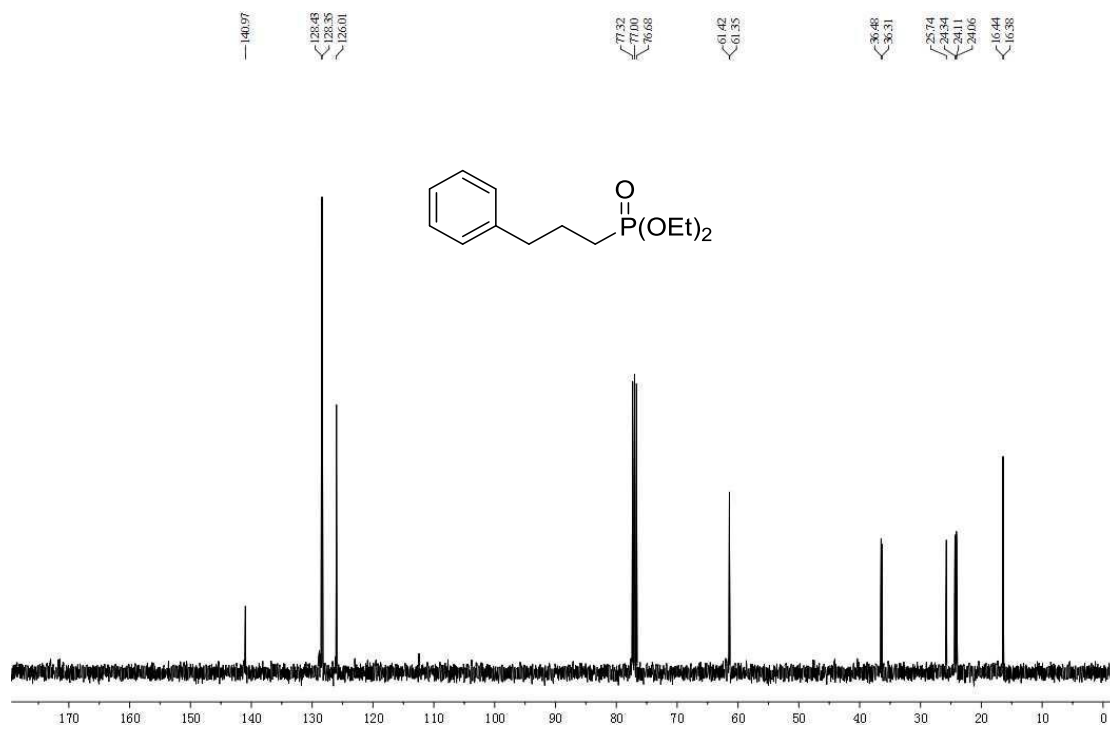



**<sup>13</sup>C NMR (101 MHz, CDCl<sub>3</sub>) spectrum for 4**

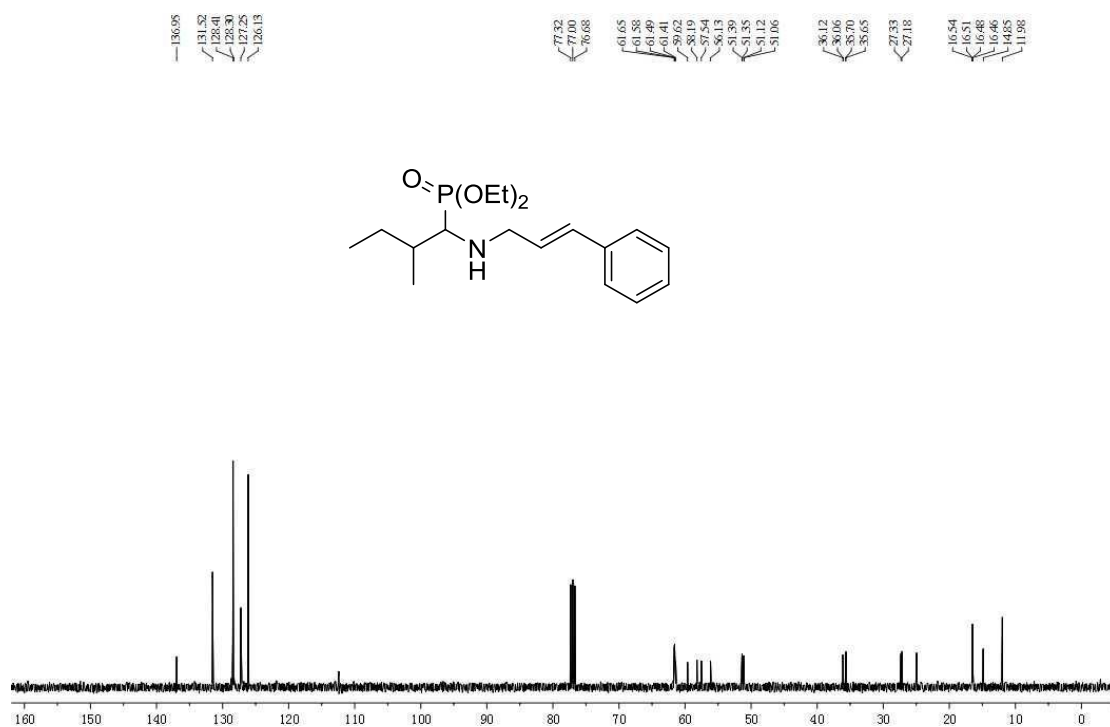

**<sup>31</sup>P NMR (162 MHz, CDCl<sub>3</sub>) spectrum for 4**

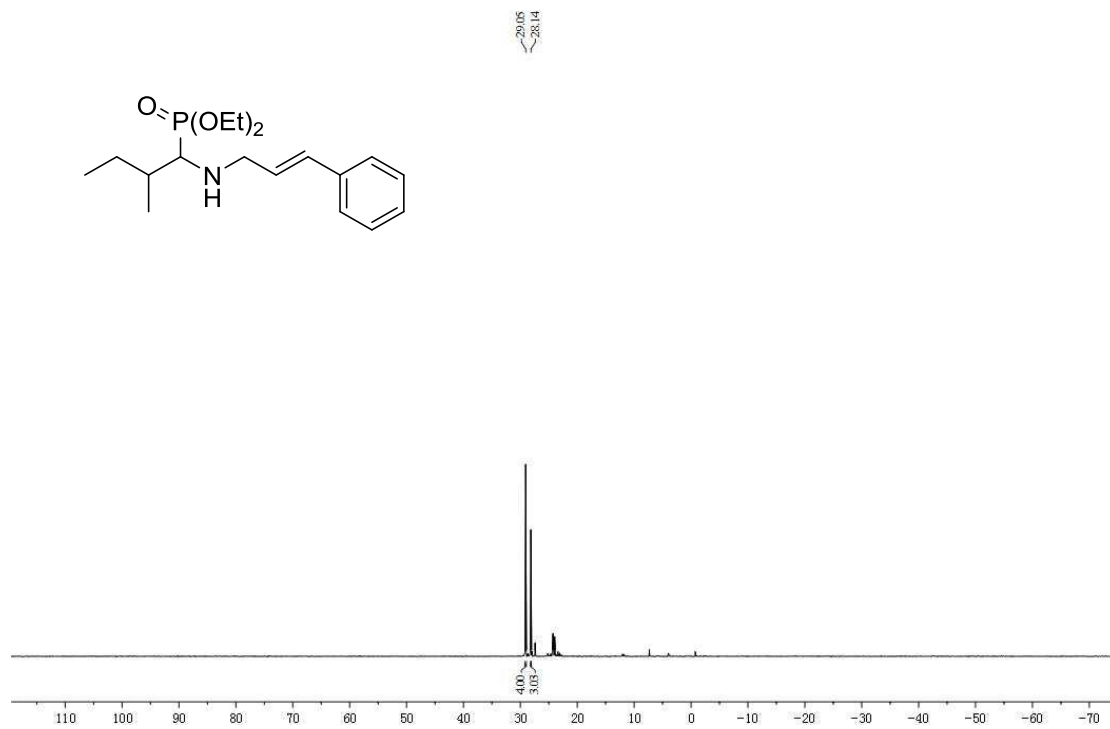

### <sup>1</sup>H NMR (600 MHz, CDCl<sub>3</sub>) spectrum for 3bb

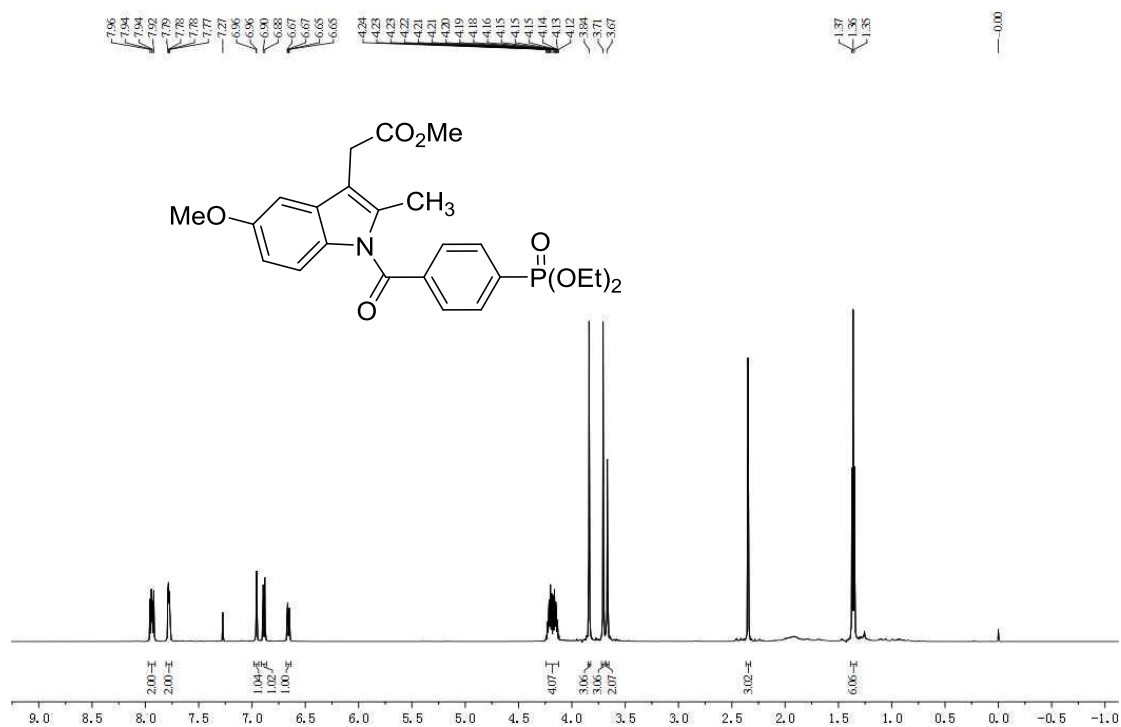

### <sup>13</sup>C NMR (151 MHz, CDCl<sub>3</sub>) spectrum for 3bb

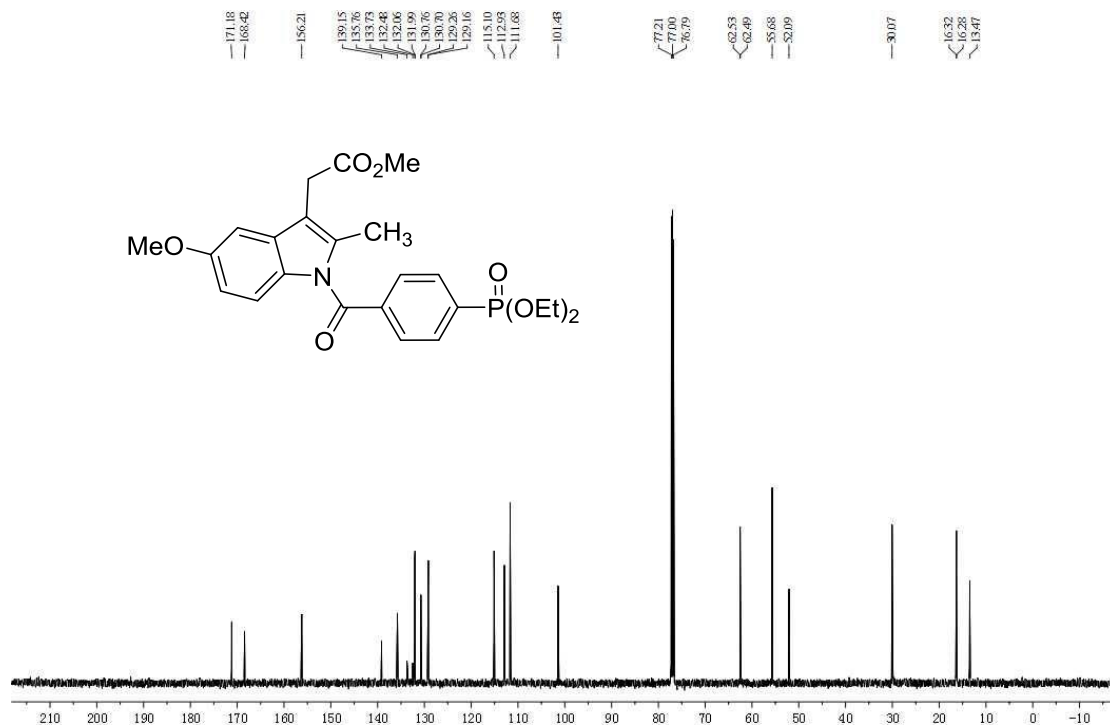

<sup>31</sup>P NMR (243 MHz, CDCl<sub>3</sub>) spectrum for 3b

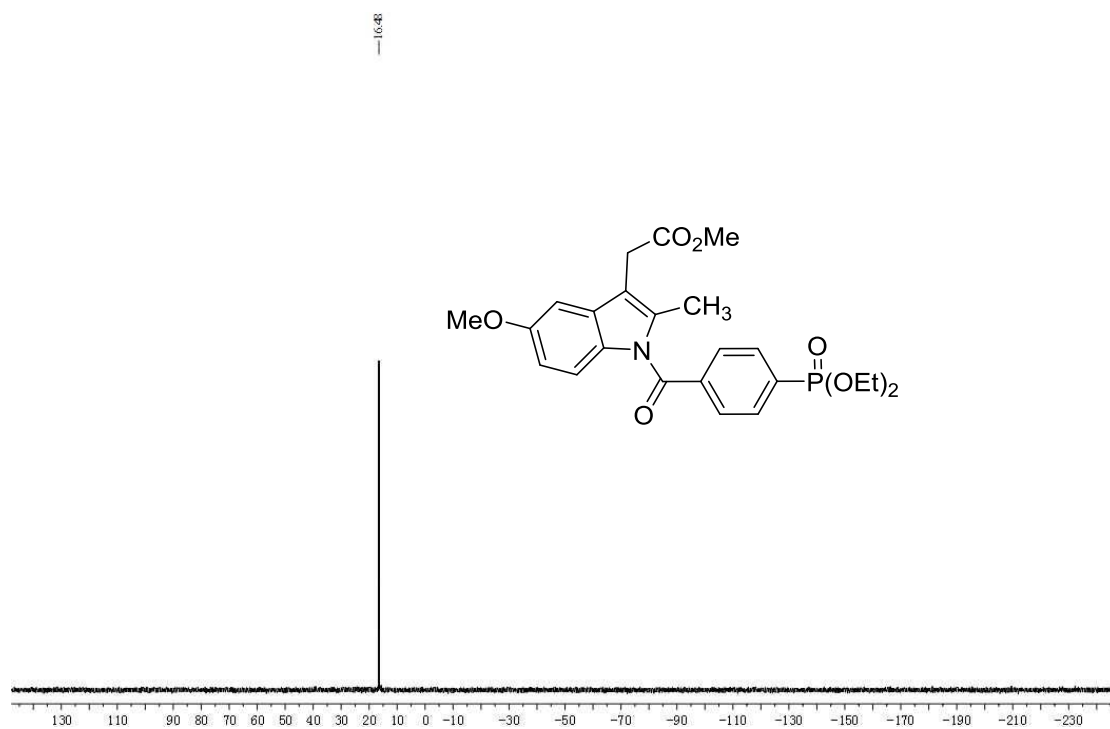

Supplement: d4cc03702b1.pdf [file d4cc03702b1.pdf]
